# Supplementary material
Source: publisher figshare collection journal article supplement (https://acs.figshare.com/ndownloader/files/26963442)
Supplement: Supplementary file 1 [file 26963442]

# Preparations of Sulfamates and Sulfamides Using a Selective Sulfamoylation Agent

Hai-Ming Wang,<sup>a</sup> Chao-Dong Xiong,<sup>c,d</sup> Xiao-Qu Chen,<sup>b</sup> Chun Hu\*<sup>a</sup> and Dong-Yu Wang\*<sup>b</sup>

<sup>a</sup> Key Laboratory of Structure-based Drug Design & Discovery, Ministry of Education; School of Pharmaceutical Engineering, Shenyang Pharmaceutical University, Shenyang 110016, China.

<sup>b</sup> School of Pharmacy, Shanghai Jiao Tong University, 800 Dongchuan Road, Shanghai 200240, China.

<sup>c</sup> CAS Key Laboratory of Receptor Research, Shanghai Institute of *Materia Medica* (SIMM), Chinese Academy of Sciences, Shanghai 201203, China.

<sup>d</sup> University of Chinese Academy of Sciences, Beijing 100049, China.

## Table of Contents

|                                                                                                                                                           |     |
|-----------------------------------------------------------------------------------------------------------------------------------------------------------|-----|
| 1. General Methods for Experiments                                                                                                                        | S1  |
| 2. Procedure for the Preparation of Sulfamoylation Reagent <b>1</b> and Measurement of Saturated Solubility                                               | S1  |
| 3. Optimization for Reaction Conditions                                                                                                                   | S2  |
| 4. General Procedure for the Sulfamoylation of Alcohols (Phenols).                                                                                        | S2  |
| 5. General Procedure for the Sulfamoylation of Amines.                                                                                                    | S3  |
| 6. Procedure for the Sulfamoylation with Various Pharmaceuticals and Bioactive Molecules, or Their Derivatives Containing an OH or NH <sub>2</sub> Moiety | S3  |
| 7. Procedure for the Selective Sulfamoylation of Compounds with Different Nucleophilic Groups.                                                            | S4  |
| 8. Characterization of Products                                                                                                                           | S5  |
| 9. Copies of NMR spectra data                                                                                                                             | S23 |
| 10. References                                                                                                                                            | S65 |

## 1. General Methods for Experiments

Solvents and chemical reagents were obtained from commercial sources and used without further purification.  $^1\text{H}$  NMR spectral data were recorded in chloroform-d, DMSO-d<sub>6</sub>, or Methanol-d<sub>4</sub> on Varian Mercury 400, 500 or 600 NMR spectrometer, and  $^{13}\text{C}$  NMR was recorded in chloroform-d, DMSO-d<sub>6</sub> or methanol-d<sub>4</sub> on Varian Mercury 500, 600 NMR spectrometer. Low-resolution mass spectra (MS) and high-resolution mass spectra (HRMS) were recorded on a Thermo Fisher Finnigan LTQ or Agilent G6520 Q-TOF spectrometer. Column chromatography was carried out on silica gel (200–300 mesh). All reactions were monitored using thin layer chromatography (TLC) on silica gel plates (15 mm × 50mm).

## 2. Procedure for the Preparation of Sulfamoylation Reagent **1** and Measurement of Saturated Solubility

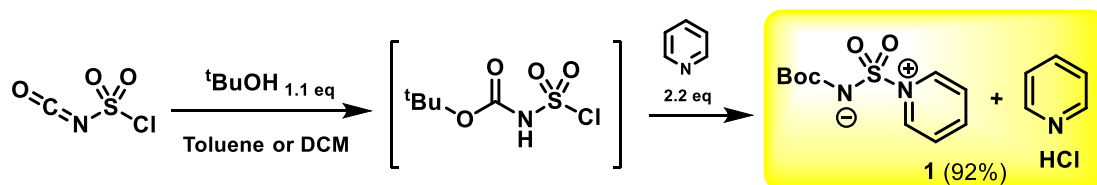

In order to prepare **1**, Tert-butyl alcohol (1630 mg, 22 mmol, 1.1 equiv) and anhydrous toluene (400.0 mL, 3.76 mol, 16.3 equiv) were added to a reaction vessel under nitrogen and the mixture was cooled to 0 °C. chlorosulfonyl isocyanate (2830 mg, 20 mmol, 1.0 equiv) was added at a rate that kept the temperature below 0 °C and the mixture was stirred for 1 hour. Pyridine (3480 mg, 44 mmol, 2.2 equiv) was added while keeping the temperature below 0 °C and the mixture was then stirred for 4 hours at room temperature. Sulfamoylating reagent **1** was collected by filtration and dried under vacuum giving a white solid (6863 mg, 18.4 mmol, 92% yield).

To Measure the saturated solubility of sulfamoylation reagent **1**, acetonitrile-d<sub>3</sub> (1.0 ml), **1** (1.0 mmol) were added to a vial at room temperature and the mixture was stirred for 5 min. After a filtration, the concentration of **1** was calculated based on  $^1\text{H}$ -NMR analysis with mesitylene as an internal standard. The saturated solubility of Burgess-type reagent (**C**) was measured with the same procedure.

### 3. Optimization for Reaction Conditions.

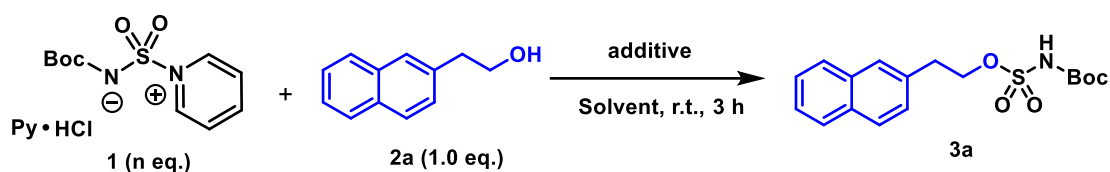

| Entry    | n        | Additive                        | Solvent    | <b>3a</b> yield <sup>[b]</sup> |
|----------|----------|---------------------------------|------------|--------------------------------|
| 1        | 1.5      | —                               | DCM        | 80%                            |
| <b>2</b> | <b>2</b> | <b>—</b>                        | <b>DCM</b> | <b>82%</b>                     |
| 3        | 2.5      | —                               | DCM        | 79%                            |
| 4        | 1.5      | —                               | THF        | 51%                            |
| 5        | 1.5      | —                               | DMF        | 43%                            |
| 6        | 1.5      | —                               | MeCN       | 79%                            |
| 7        | 1.5      | —                               | DCE        | 71%                            |
| 8        | 1.5      | Cs <sub>2</sub> CO <sub>3</sub> | DCM        | 77%                            |
| 9        | 1.5      | KO <sup>t</sup> Bu              | DCM        | 61%                            |
| 10       | 1.5      | DIPEA                           | DCM        | 53%                            |
| 11       | 1.5      | K <sub>2</sub> CO <sub>3</sub>  | DCM        | 73%                            |
| 12       | 1.5      | CF <sub>3</sub> COOH            | DCM        | 34%                            |
| 13       | 1.5      | AlCl <sub>3</sub>               | DCM        | 32%                            |
| 14       | 1.5      | CH <sub>3</sub> COOH            | DCM        | 43%                            |

<sup>[a]</sup> Reaction conditions: 2-(naphthalen-2-yl)ethan-1-ol (**2a**, 0.2 mmol), **1** (n eq.), additive (0.4 mmol), Ligand (0.024 mmol), Solvent (1 ml), room temperature, 3 h.

<sup>[b]</sup> Yields were calculated based on <sup>1</sup>H-NMR analysis with mesitylene as an internal standard.

### 4. General Procedure for the Reactions of Sulfamoylation Reagent **1** with

#### Alcohols (Phenol)

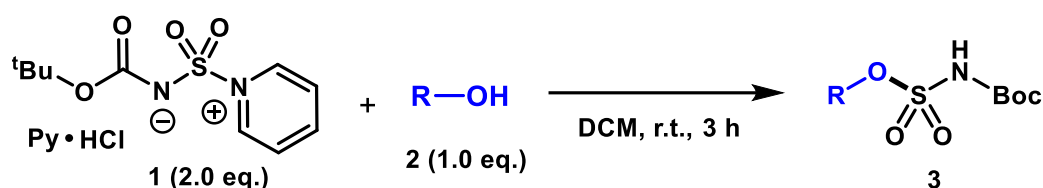

Alcohol (0.2 mmol), **1** (0.3 mmol) and dry dichloromethane (3 mL) were added to a reaction vessel at room temperature and the mixture was stirred for 3 hours. After the completion of the reaction as indicated by TLC, the mixture was concentrated under a reduced pressure. Saturated aqueous Na<sub>2</sub>CO<sub>3</sub> (50 mL) was added to the residue and the resulting mixture was extracted with EA. The organic layers were washed with HCl (0.5M) in water. The organic layer was dried over Na<sub>2</sub>SO<sub>4</sub>, concentrated under a

reduced pressure. The residue was purified by flash column chromatography on silica gel

Phenol (0.2 mmol), 1(0.4 mmol) and dry dichloromethane (3 mL) were added to a reaction vessel at room temperature and the mixture was stirred for 3.5 hours. After the completion of the reaction as indicated by TLC, the mixture was concentrated under a reduced pressure. Saturated aqueous Na<sub>2</sub>CO<sub>3</sub> (50 mL) was added to the residue and the resulting mixture was extracted with EA. The organic layers were washed with HCl (0.5M) in water. The organic layer was dried over Na<sub>2</sub>SO<sub>4</sub>, concentrated under a reduced pressure. The residue was purified by flash column chromatography on silica gel.

#### 5. General Procedure for the Reactions of Sulfamoylation Reagent 1 with RNHR'(H).

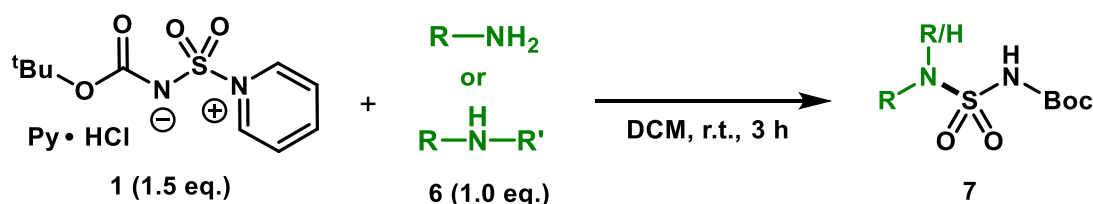

Aniline (0.2 mmol), 1(0.3 mmol) and dry dichloromethane (3 mL) were added to a reaction vessel at room temperature and the mixture was stirred for 3 hours. After the completion of the reaction as indicated by TLC, the mixture was concentrated under a reduced pressure. Saturated aqueous Na<sub>2</sub>CO<sub>3</sub> (50 mL) was added to the residue and the resulting mixture was extracted with EA. The organic layers were washed with HCl (0.5M) in water. The organic layer was dried over Na<sub>2</sub>SO<sub>4</sub>, concentrated under a reduced pressure. The residue was purified by flash column chromatography on silica gel

#### 6. General Procedure for the Reactions of Sulfamoylation Reagent 1 with Various Pharmaceuticals and Bioactive Molecules, or Their Derivatives Containing an OH or NH<sub>2</sub> Moiety.

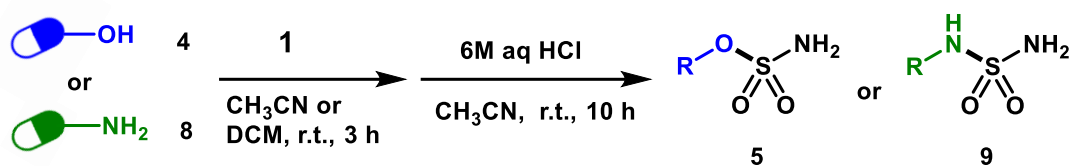

6 or 7 (0.2 mmol), 1 (0.4 mmol) and dry acetonitrile (3 mL) were added to the reaction vessel at room temperature, and the mixture was stirred for 3 hours. After the completion of the reaction indicated by TLC, HCl (12M) in water (0.5 mL) was added dropwise, and the mixture was stirred for 8 hours. After the completion of the reaction indicated by TLC, the mixture was concentrated under reduced pressure. Saturated aqueous Na<sub>2</sub>CO<sub>3</sub> (50 mL) was added to the residue, and the resulting mixture was extracted with EA. The organic layer was dried over Na<sub>2</sub>SO<sub>4</sub> and concentrated under reduced pressure. The residue was purified by flash column chromatography on silica gel.

## 7. General Procedure for the Reactions of Sulfamoylation Reagent 1 with Compounds with Different Nucleophilic Groups.

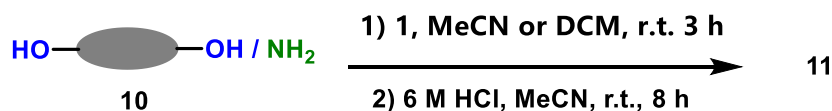

10 (0.2 mmol), 1 (0.3-0.4 mmol) and dry dichloromethane (3 mL) were added to the reaction vessel at room temperature, and the mixture was stirred for 3.3 hours. After the completion of the reaction was indicated by TLC, the solvent was evaporated, anhydrous acetonitrile (3 mL) was added, and HCl (12M) in water (0.5 mL) was added dropwise at room temperature. The mixture was concentrated under reduced pressure. Saturated aqueous Na<sub>2</sub>CO<sub>3</sub> (50 mL) was added to the residue, and the resulting mixture was extracted with EA. The combined organic layer was dried over Na<sub>2</sub>SO<sub>4</sub> and concentrated under reduced pressure. The residue was purified by flash column chromatography on silica gel.

## 8. Characterization of Products

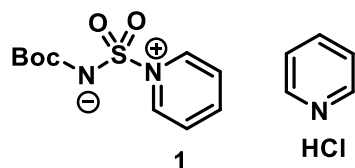

white-solid (6863.2mg, 92% yield). **<sup>1</sup>H NMR** (400 MHz, Chloroform-*d*)  $\delta$  8.92 (dd,  $J$  = 6.5, 1.4 Hz, 4H), 8.54 – 8.47 (m, 2H), 8.03 (dd,  $J$  = 7.8, 6.7 Hz, 4H), 7.65 (s, 1H), 1.36 (s, 9H). **<sup>13</sup>C NMR** (101 MHz, Chloroform-*d*)  $\delta$  152.8, 145.9, 141.4, 127.1, 80.9, 27.9. HRMS (ESI): (tert-butoxycarbonyl) (pyridin-1-ium-1-ylsulfonfyl) amide calc'd for C<sub>10</sub>H<sub>15</sub>N<sub>2</sub>O<sub>4</sub>S<sup>+</sup> [M+H]<sup>+</sup>: 259.0747, found: 259.0751.

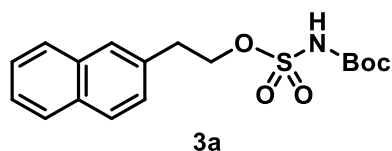

white-solid (57.5 mg, 82% yield). The product was purified by flash column chromatography on silica gel (eluent: dichloromethane/ammonia methanol = 10:1) **<sup>1</sup>H NMR** (400 MHz, Chloroform-*d*)  $\delta$  7.82 – 7.73 (m, 3H), 7.68 – 7.63 (m, 1H), 7.50 – 7.40 (m, 2H), 7.32 (dd,  $J$  = 8.5, 1.8 Hz, 1H), 4.57 (t,  $J$  = 7.1 Hz, 2H), 3.20 (t,  $J$  = 7.1 Hz, 2H), 1.39 (s, 9H). **<sup>13</sup>C NMR** (101 MHz, Chloroform-*d*)  $\delta$  133.6, 133.5, 132.4, 131.3, 128.4, 127.6, 127.6, 127.0, 126.2, 125.7, 84.2, 73.5, 35.4, 27.8. HRMS (ESI): calc'd for C<sub>17</sub>H<sub>25</sub>N<sub>2</sub>O<sub>5</sub>S<sup>+</sup> [M+ NH<sub>4</sub>]<sup>+</sup>: 369.1479, found: 369.1454.

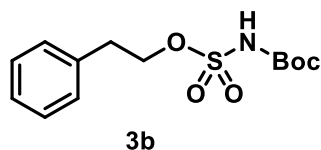

white-solid (50.58 mg, 84% yield) The product was purified by flash column chromatography on silica gel (eluent: dichloromethane/ammonia methanol = 8:1) **<sup>1</sup>H NMR** (400 MHz, Acetonitrile-*d*<sub>3</sub>)  $\delta$  7.38 – 7.24 (m, 5H), 4.51 – 4.46 (m, 2H), 3.05 (t,  $J$  = 6.6 Hz, 2H), 1.46 (s, 9H). **<sup>13</sup>C NMR** (101 MHz, Acetonitrile-*d*<sub>3</sub>)  $\delta$  149.1, 136.9, 128.9, 126.8, 117.3, 83.4, 73.3, 34.6, 27.1. HRMS (ESI): calc'd for C<sub>13</sub>H<sub>19</sub>NNaO<sub>5</sub>S<sup>+</sup> [M+ Na]<sup>+</sup>: 324.0876, found: 324.0884.

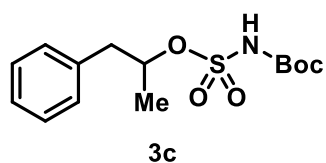

white-solid (56.72 mg, 90% yield) The product was purified by flash column chromatography on silica gel (eluent: dichloromethane/ammonia methanol = 8:1) **<sup>1</sup>H NMR** (400 MHz, Acetonitrile-*d*<sub>3</sub>) δ 7.39 – 7.01 (m, 5H), 4.97 (m, 1H), 3.04 – 2.86 (m, 2H), 1.42 (s, 9H), 1.27 (d, *J* = 6.3 Hz, 3H). **<sup>13</sup>C NMR** (101 MHz, Acetonitrile-*d*<sub>3</sub>) δ 149.3, 136.3, 129.7, 126.9, 117.3, 83.3, 83.3, 41.9, 27.2, 19.0 HRMS (ESI): calc'd for C<sub>14</sub>H<sub>25</sub>N<sub>2</sub>O<sub>5</sub>S<sup>+</sup> [M+ NH<sub>4</sub>]<sup>+</sup>: 333.1479, found: 333.1470.

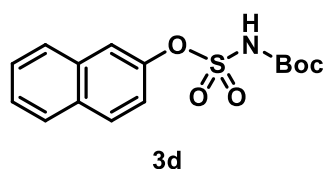

white-solid (48.46 mg, 75% yield) The product was purified by flash column chromatography on silica gel (eluent: dichloromethane/ammonia methanol = 10:1) **<sup>1</sup>H NMR** (400 MHz, Methanol-*d*<sub>4</sub>) δ 7.89 – 7.72 (m, 4H), 7.54 – 7.38 (m, 3H), 1.43 (s, 9H). **<sup>13</sup>C NMR** (101 MHz, Methanol-*d*<sub>4</sub>) δ 158.5, 149.3, 133.8, 131.6, 128.8, 127.3, 127.3, 126.1, 125.3, 121.5, 118.7, 78.5, 27.3. HRMS (ESI): calc'd for C<sub>15</sub>H<sub>17</sub>NNaO<sub>5</sub>S<sup>+</sup> [M+ Na]<sup>+</sup>: 346.0720, found: 346.0719.

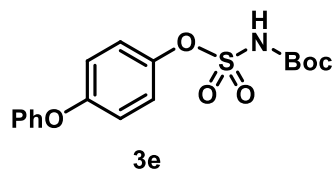

Colorless-oil (61.32 mg, 84% yield) The product was purified by flash column chromatography on silica gel (eluent: dichloromethane/ammonia methanol = 10:1) **<sup>1</sup>H NMR** (400 MHz, Chloroform-*d*) δ 7.33 – 7.17 (m, 4H), 7.11 – 7.04 (m, 1H), 6.97 – 6.85 (m, 4H), 1.40 (s, 9H). **<sup>13</sup>C NMR** (101 MHz, Chloroform-*d*) δ 156.7, 156.4, 148.5,



144.9, 130.0, 124.1, 123.2, 119.4, 119.3, 85.1, 27.9. HRMS (ESI): calc'd for  $C_{17}H_{23}N_2O_6S^+$   $[M+NH_4]^+$ : 383.1271, found: 383.1261.

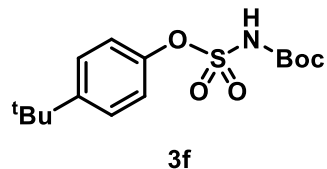

white-solid (56.59 mg, 86% yield) The product was purified by flash column chromatography on silica gel (eluent: dichloromethane/ammonia methanol = 7:1) **<sup>1</sup>H NMR** (400 MHz, Methanol-*d*<sub>4</sub>)  $\delta$  7.38 (d, *J* = 8.8 Hz, 2H), 7.21 (d, *J* = 8.8 Hz, 2H), 1.45 (s, 9H), 1.31 (s, 9H). **<sup>13</sup>C NMR** (101 MHz, Methanol-*d*<sub>4</sub>)  $\delta$  158.3, 149.3, 148.6, 125.8, 121.4, 78.6, 33.9, 30.5, 27.3. HRMS (ESI): calc'd for  $C_{15}H_{23}NNaO_5S^+$   $[M+Na]^+$ : 352.1189, found: 352.1192.

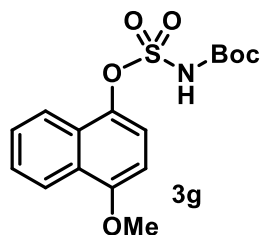

Brown-oil (57.89 mg, 82% yield) The product was purified by flash column chromatography on silica gel (eluent: dichloromethane/ammonia methanol = 8:1) **<sup>1</sup>H NMR** (400 MHz, Methanol-*d*<sub>4</sub>)  $\delta$  8.33 – 8.14 (m, 2H), 7.59 – 7.40 (m, 3H), 6.89 – 6.82 (m, 1H), 3.99 (s, 3H), 1.40 (s, 9H). **<sup>13</sup>C NMR** (101 MHz, Methanol-*d*<sub>4</sub>)  $\delta$  153.7, 140.3, 128.3, 126.4, 126.0, 125.4, 121.9, 121.5, 118.0, 102.6, 68.1, 54.9, 29.8. HRMS (ESI): calc'd for  $C_{16}H_{23}N_2O_6S^+$   $[M+NH_4]^+$ : 371.1271, found: 371.1253.

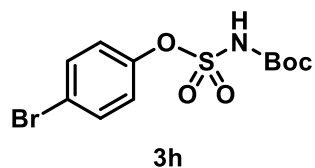

white-solid (49.14 mg, 70% yield) The product was purified by flash column chromatography on silica gel (eluent: dichloromethane/ammonia methanol = 8:1) **<sup>1</sup>H**

**NMR** (400 MHz, Methanol-*d*<sub>4</sub>)  $\delta$  7.54 – 7.50 (m, 2H), 7.24 – 7.20 (m, 2H), 1.45 (s, 9H). **<sup>13</sup>C NMR** (101 MHz, Chloroform-*d*)  $\delta$  154.5, 136.5, 136.1, 127.6, 122.6, 72.0, 33.7. HRMS (ESI): calc'd for C<sub>11</sub>H<sub>13</sub>BrNO<sub>5</sub>S<sup>-</sup> [M-H]<sup>-</sup>: 349.9703, found: 349.9702.

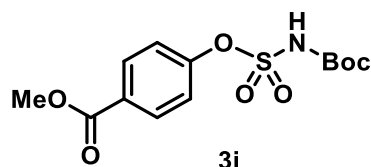

white-solid (50.31 mg, 76% yield) The product was purified by flash column chromatography on silica gel (eluent: dichloromethane/ammonia methanol = 7:1). **<sup>1</sup>H NMR** (400 MHz, Acetonitrile-*d*<sub>3</sub>)  $\delta$  8.08 – 7.99 (m, 2H), 7.40 – 7.32 (m, 2H), 3.87 (s, 3H), 1.41 (s, 9H). **<sup>13</sup>C NMR** (101 MHz, Acetonitrile-*d*<sub>3</sub>)  $\delta$  166.0, 158.9, 130.9, 121.7, 51.8, 27.3. HRMS (ESI): calc'd for C<sub>13</sub>H<sub>16</sub>NO<sub>7</sub>S<sup>-</sup> [M-H]<sup>-</sup>: 330.0653, found: 330.0653.

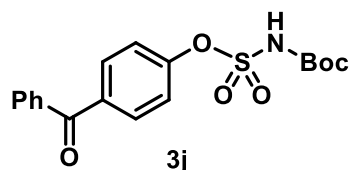

Yellow-oil (49.02 mg, 65% yield) The product was purified by flash column chromatography on silica gel (eluent: dichloromethane/ammonia methanol = 8:1). **<sup>1</sup>H NMR** (400 MHz, Chloroform-*d*)  $\delta$  7.85 – 7.64 (m, 4H), 7.58 – 7.51 (m, 1H), 7.49 – 7.33 (m, 4H), 1.41 (s, 9H). **<sup>13</sup>C NMR** (101 MHz, Chloroform-*d*)  $\delta$  195.5, 153.2, 137.0, 136.1, 132.8, 131.8, 130.0, 128.4, 121.8, 27.9. HRMS (ESI): calc'd for C<sub>18</sub>H<sub>20</sub>NO<sub>6</sub>S<sup>+</sup> [M+H]<sup>+</sup>: 378.1006, found: 378.0478.

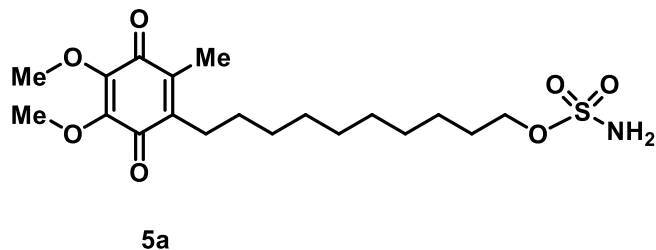

yellow-solid (67.55, 77% yield) The product was purified by flash column chromatography on silica gel (eluent: dichloromethane/ammonia methanol = 8:1) **<sup>1</sup>H NMR** (400 MHz, Methanol-*d*<sub>4</sub>) δ 4.11 (t, *J* = 6.5 Hz, 2H), 3.96 – 3.95 (m, 6H), 2.49 – 2.43 (m, 2H), 1.99 (s, 3H), 1.75 – 1.66 (m, 2H), 1.43 – 1.30 (m, 14H). **<sup>13</sup>C NMR** (101 MHz, Methanol-*d*<sub>4</sub>) δ 184.6, 184.2, 144.4, 144.4, 142.7, 138.7, 69.7, 60.2, 60.2, 29.4, 29.1, 29.0, 28.9, 28.7, 28.6, 28.2, 25.7, 25.2, 10.5. HRMS calc'd for C<sub>19</sub>H<sub>32</sub>NO<sub>7</sub>S<sup>+</sup> [M + H]<sup>+</sup> 418.1894, found 418.1898.

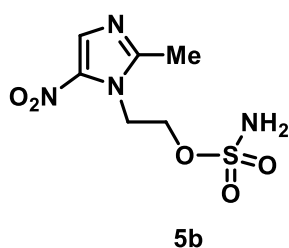

white-solid (40 mg, 80% yield) The product was purified by flash column chromatography on silica gel (eluent: dichloromethane/ammonia methanol = 8:1). **<sup>1</sup>H NMR** (400 MHz, Methanol-*d*<sub>4</sub>) δ 7.96 (s, 1H), 4.72 – 4.69 (m, 2H), 4.48 – 4.44 (m, 2H), 2.53 (s, 3H). **<sup>13</sup>C NMR** (101 MHz, Methanol-*d*<sub>4</sub>) δ 151.8, 131.4, 67.4, 45.2, 12.8. HRMS calc'd for C<sub>6</sub>H<sub>11</sub>N<sub>4</sub>O<sub>5</sub>S [M + H]<sup>+</sup> 251.0445, found 251.0421.

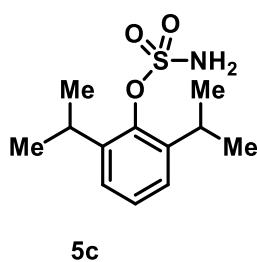

white-solid (38.57 mg, 75% yield) The product was purified by flash column chromatography on silica gel (eluent: dichloromethane/ammonia methanol = 9:1) **<sup>1</sup>H NMR** (400 MHz, Methanol-*d*<sub>4</sub>) δ 7.23 – 7.16 (m, 3H), 3.64 – 3.55 (m, 2H), 1.21 (d, 12H). **<sup>13</sup>C NMR** (101 MHz, Methanol-*d*<sub>4</sub>) δ 145.3, 142.6, 126.7, 124.0, 26.9, 22.7. HRMS calc'd for C<sub>12</sub>H<sub>19</sub>NO<sub>3</sub>S<sup>+</sup> [M + Na]<sup>+</sup> 280.0978, found 280.0994.

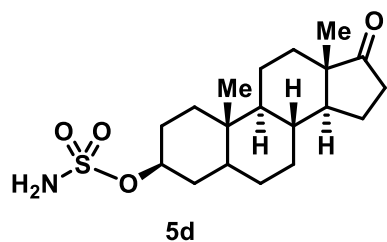

white-solid (54.64 mg, 74% yield) The product was purified by flash column chromatography on silica gel (eluent: dichloromethane/ammonia methanol = 10:1) **<sup>1</sup>H NMR** (400 MHz, Methanol-*d*<sub>4</sub>) δ 4.47 – 4.37 (m, 1H), 2.49 – 2.38 (m, 1H), 2.11 – 1.91 (m, 3H), 1.86 – 1.49 (m, 9H), 1.39 – 1.17 (m, 6H), 1.13 – 0.99 (m, 2H), 0.89 (d, *J* = 9.5 Hz, 6H), 0.81 – 0.72 (m, 1H). **<sup>13</sup>C NMR** (101 MHz, Methanol-*d*<sub>4</sub>) δ 80.8, 54.3, 51.3, 44.7, 36.6, 35.3, 35.2, 34.9, 34.6, 31.4, 30.6, 28.1, 28.1, 21.3, 20.2, 12.8, 11.1. HRMS calc'd for C<sub>19</sub>H<sub>32</sub>NO<sub>4</sub>S [M + H]<sup>+</sup> 370.2047, found 370.2038.

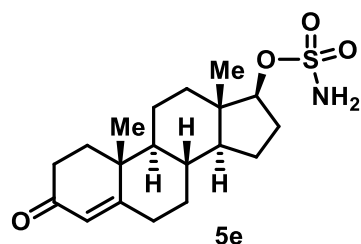

white-solid (59.48 mg, 81% yield) The product was purified by flash column chromatography on silica gel (eluent: dichloromethane/ammonia methanol = 10:1) **<sup>1</sup>H NMR** (400 MHz, Methanol-*d*<sub>4</sub>) δ 5.74 – 5.71 (m, 1H), 4.39 – 4.30 (m, 1H), 2.55 – 2.43 (m, 2H), 2.36 – 2.17 (m, 3H), 2.13 – 2.05 (m, 1H), 2.00 – 1.62 (m, 7H), 1.56 – 1.37 (m, 2H), 1.36 – 1.26 (m, 2H), 1.25 (s, 3H), 1.13 – 0.96 (m, 3H), 0.89 (s, 3H). **<sup>13</sup>C NMR** (101 MHz, Methanol-*d*<sub>4</sub>) δ 200.9, 173.4, 122.8, 88.5, 53.8, 49.6, 42.5, 38.6, 36.0, 35.3, 35.2, 33.3, 32.4, 31.3, 27.4, 22.8, 20.1, 16.3, 10.6. HRMS calc'd for C<sub>19</sub>H<sub>30</sub>NO<sub>4</sub>S<sup>+</sup> [M + H]<sup>+</sup> 368.1890, found 368.1862.

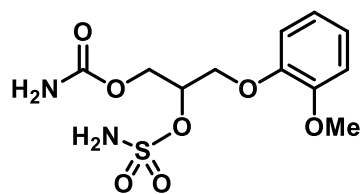

5f

white-solid (47.37 mg, 74% yield) The product was purified by flash column chromatography on silica gel (eluent: dichloromethane/ammonia methanol = 10:1). **<sup>1</sup>H NMR** (400 MHz, Methanol-*d*<sub>4</sub>) δ 7.03 – 6.84 (m, 4H), 5.06 – 4.94 (m, 1H), 4.42 (dd, *J* = 12.0, 4.0 Hz, 1H), 4.35 – 4.26 (m, 2H), 4.18 (dd, *J* = 10.6, 6.3 Hz, 1H), 3.82 (s, 3H). **<sup>13</sup>C NMR** (101 MHz, Methanol-*d*<sub>4</sub>) δ 157.8, 149.6, 147.8, 122.0, 120.8, 114.2, 112.2, 77.4, 67.7, 62.7, 55.1. HRMS calc'd for C<sub>11</sub>H<sub>16</sub>N<sub>2</sub>NaO<sub>7</sub>S<sup>+</sup> [M + Na]<sup>+</sup> 343.0570, found 343.0572.

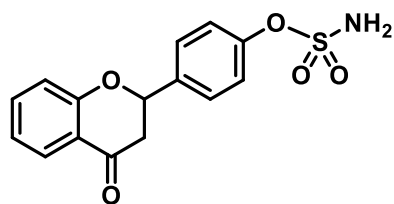

5g

white-solid (48.50 mg, 76% yield) The product was purified by flash column chromatography on silica gel (eluent: dichloromethane/ammonia methanol = 10:1). **<sup>1</sup>H NMR** (400 MHz, Methanol-*d*<sub>4</sub>) δ 7.92 – 7.80 (m, 1H), 7.67 – 7.52 (m, 3H), 7.38 (d, *J* = 8.3 Hz, 2H), 7.15 – 7.02 (m, 2H), 5.63 – 5.55 (m, 1H), 3.18 – 3.05 (m, 1H), 2.87 (dd, *J* = 16.9, 3.1 Hz, 1H). **<sup>13</sup>C NMR** (101 MHz, Methanol-*d*<sub>4</sub>) δ 192.4, 161.6, 150.7, 137.6, 136.2, 127.4, 126.3, 122.2, 121.3, 120.7, 117.8, 78.8, 43.9. HRMS calc'd for C<sub>15</sub>H<sub>14</sub>NO<sub>5</sub>S<sup>+</sup> [M + H]<sup>+</sup> 320.0587, found 320.0570.

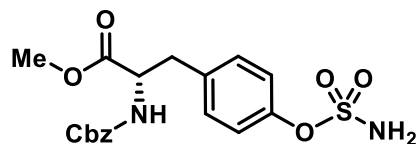

5h

white-solid (57.13 mg, 70% yield) The product was purified by flash column chromatography on silica gel (eluent: dichloromethane/ammonia methanol = 10:1) **<sup>1</sup>H NMR** (400 MHz, Methanol-*d*<sub>4</sub>) δ 7.55 – 7.07 (m, 9H), 5.03 (s, 2H), 4.48 – 4.39 (m, 1H), 3.71 (s, 3H), 3.24 – 3.12 (m, 1H), 3.01 – 2.88(m,1H). **<sup>13</sup>C NMR** (101 MHz, Methanol-*d*<sub>4</sub>) δ 172.3, 157.0, 149.6, 136.7, 135.7, 130.1, 128.1, 127.6, 127.3, 121.9, 66.2, 55.5, 51.4, 36.5. HRMS calc'd for C<sub>18</sub>H<sub>21</sub>N<sub>2</sub>O<sub>7</sub>S<sup>+</sup> [M + H]<sup>+</sup> 409.1064, found 409.1046.

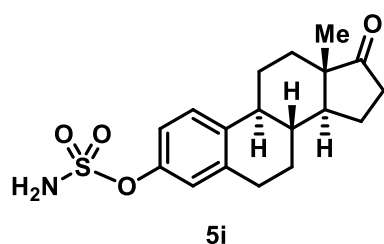

white-solid (56.54 mg, 81% yield) The product was purified by flash column chromatography on silica gel (eluent: dichloromethane/ammonia methanol = 10:1) **<sup>1</sup>H NMR** (400 MHz, Methanol-*d*<sub>4</sub>) δ 7.37 – 7.29 (m, 1H), 7.10 – 6.99 (m, 2H), 2.98 – 2.86 (m, 2H), 2.55 – 2.39 (m, 2H), 2.35 – 2.24 (m, 1H), 2.21 – 1.99 (m, 3H), 1.93 – 1.83 (m, 1H), 1.68 – 1.41 (m, 6H), 0.91 (s, 3H). **<sup>13</sup>C NMR** (101 MHz, Methanol-*d*<sub>4</sub>) δ 222.1, 148.6, 138.2, 138.2, 126.1, 121.8, 119.0, 50.2, 44.0, 38.1, 35.3, 31.3, 28.9, 26.0, 25.5, 21.1, 12.8. HRMS calc'd for C<sub>18</sub>H<sub>24</sub>NO<sub>4</sub>S<sup>+</sup> [M + H]<sup>+</sup> 409.1064, found 409.1046.

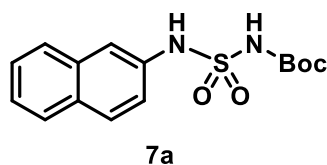

white-solid (54.76 mg, 85% yield) The product was purified by flash column chromatography on silica gel (eluent: dichloromethane/ammonia methanol = 8:1) **<sup>1</sup>H NMR** (400 MHz, Methanol-*d*<sub>4</sub>) δ 7.84 – 7.74 (m, 3H), 7.71 – 7.67 (m, 1H), 7.50 – 7.35 (m, 3H), 1.34 (s, 9H). **<sup>13</sup>C NMR** (101 MHz, Methanol-*d*<sub>4</sub>) δ 150.7, 135.0, 133.8, 131.0,

128.6, 127.3, 127.0, 126.3, 124.9, 120.4, 117.1, 82.0, 26.8. HRMS (ESI): calc'd for  $C_{15}H_{17}N_2O_4S^-$   $[M-H]^-$  321.0915, found: 321.0917.

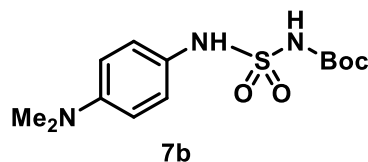

Yellow-solid (51.66 mg, 82% yield) The product was purified by flash column chromatography on silica gel (eluent: dichloromethane/ammonia methanol = 7:1)  $^1H$  NMR (400 MHz, Methanol- $d_4$ )  $\delta$  7.10 (d,  $J$  = 9.0 Hz, 2H), 6.73 (d,  $J$  = 9.0 Hz, 2H), 2.90 (s, 6H), 1.45 (s, 9H).  $^{13}C$  NMR (101 MHz, Methanol- $d_4$ )  $\delta$  151.1, 149.3, 126.3, 124.4, 113.0, 81.8, 39.8, 26.9. HRMS (ESI): calc'd for  $C_{13}H_{22}N_3O_4S^+$   $[M+H]^+$ : 316.1326, found: 316.1303.

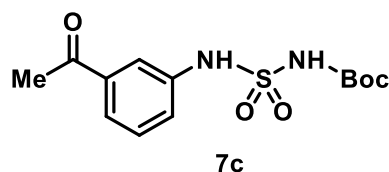

white-solid (47.1 mg, 75% yield) The product was purified by flash column chromatography on silica gel (eluent: dichloromethane/ammonia methanol = 7:1).  $^1H$  NMR (400 MHz, Methanol- $d_4$ )  $\delta$  7.84 (m, 1H), 7.77 (m, 1H), 7.49 – 7.43 (m, 2H), 2.59 (s, 3H), 1.38 (s, 9H).  $^{13}C$  NMR (101 MHz, Methanol- $d_4$ )  $\delta$  198.4, 138.2, 137.9, 129.2, 124.9, 124.2, 119.7, 81.9, 26.8, 25.4. HRMS (ESI): calc'd for  $C_{13}H_{22}N_3O_5S^+$   $[M+HH^4]^+$ : 332.1275, found: 332.1260.

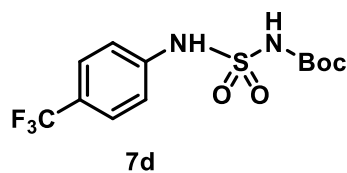

yellow-solid (53.4 mg, 78% yield) The product was purified by flash column chromatography on silica gel (eluent: dichloromethane/ammonia methanol = 8:1).  $^1H$

**NMR** (400 MHz, Methanol-*d*<sub>4</sub>)  $\delta$  7.62 – 7.58 (m, 2H), 7.38 – 7.34 (m, 2H), 1.36 (s, 9H). **<sup>13</sup>C NMR** (101 MHz, Methanol-*d*<sub>4</sub>)  $\delta$  150.4, 141.2, 126.0 (q, *J* = 3.8 Hz), 125.4 (q, *J* = 33.33 Hz), 124.3 (q, *J* = 271.69 Hz), 118.0, 82.2, 26.7. HRMS (ESI): calc'd for C<sub>12</sub>H<sub>14</sub>F<sub>3</sub>N<sub>2</sub>O<sub>4</sub>S<sup>-</sup> [M-H]<sup>-</sup>: 339.0632, found: 339.0627.

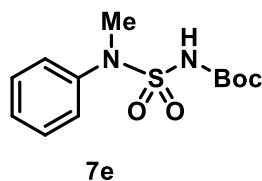

white-solid (50.35 mg, 88% yield) The product was purified by flash column chromatography on silica gel (eluent: dichloromethane/ammonia methanol = 7:1) **<sup>1</sup>H NMR** (400 MHz, Methanol-*d*<sub>4</sub>)  $\delta$  7.45 – 7.35 (m, 4H), 7.34 – 7.27 (m, 1H), 3.43 (s, 3H), 1.46 (s, 9H). **<sup>13</sup>C NMR** (101 MHz, Methanol-*d*<sub>4</sub>)  $\delta$  151.2, 141.4, 128.9, 127.0, 126.0, 82.1, 39.6, 26.9. HRMS (ESI): calc'd for C<sub>12</sub>H<sub>18</sub>N<sub>2</sub>NaO<sub>4</sub>S<sup>+</sup> [M+Na]<sup>+</sup>: 309.0879, found: 309.0863.

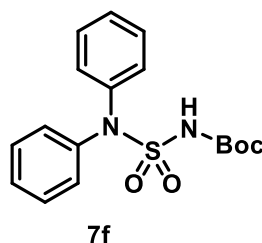

white-solid (63.36 mg, 91% yield) The product was purified by flash column chromatography on silica gel (eluent: dichloromethane/ammonia methanol = 8:1) **<sup>1</sup>H NMR** (400 MHz, Methanol-*d*<sub>4</sub>)  $\delta$  7.56 – 7.49 (m, 4H), 7.40 – 7.32 (m, 4H), 7.30 – 7.23 (m, 2H), 1.44 (s, 9H). **<sup>13</sup>C NMR** (101 MHz, Methanol-*d*<sub>4</sub>)  $\delta$  150.7, 141.8, 128.9, 128.0, 127.0, 82.0, 26.9. HRMS (ESI): calc'd for C<sub>17</sub>H<sub>20</sub>N<sub>2</sub>NaO<sub>4</sub>S<sup>+</sup> [M+Na]<sup>+</sup>: 371.1036, found: 371.1040.



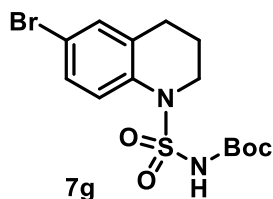

white-solid (62.4 mg, 80% yield) The product was purified by flash column chromatography on silica gel (eluent: dichloromethane/ammonia methanol = 8:1). **<sup>1</sup>H NMR** (400 MHz, Methanol-*d*<sub>4</sub>) δ 7.56 – 7.47 (m, 1H), 7.29 – 7.22 (m, 2H), 3.91 – 3.77 (m, 2H), 2.77 (t, *J* = 6.5 Hz, 2H), 2.04 – 1.91 (m, 2H), 1.34 (s, 9H). **<sup>13</sup>C NMR** (101 MHz, Methanol-*d*<sub>4</sub>) δ 136.2, 131.6, 131.4, 128.9, 122.9, 116.0, 82.1, 26.7, 26.7 21.9. HRMS (ESI): calc'd for C<sub>14</sub>H<sub>18</sub>BrN<sub>2</sub>O<sub>4</sub>S<sup>-</sup> [M-H]<sup>-</sup>: 389.0176, found: 339.0177.

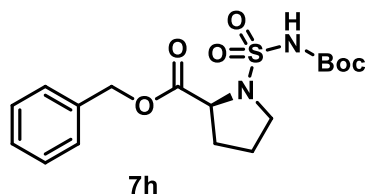

Colorless oil (57.6 mg, 75% yield) The product was purified by flash column chromatography on silica gel (eluent: dichloromethane/ammonia methanol = 8:1). **<sup>1</sup>H NMR** (400 MHz, Chloroform-*d*) δ 7.39 – 7.29 (m, 5H), 5.23 – 5.13 (m, 2H), 4.79 – 4.70 (m, 1H), 3.68 – 3.58 (m, 1H), 3.56 – 3.45 (m, 1H), 2.29 – 2.20 (m, 1H), 2.08 – 1.94 (m, 3H), 1.48 (s, 9H). **<sup>13</sup>C NMR** (101 MHz, Chloroform-*d*) δ 172.0, 150.1, 135.5, 128.6, 128.4, 128.1, 83.5, 67.1, 61.9, 49.0, 30.8, 28.0, 24.7. HRMS (ESI): calc'd for C<sub>17</sub>H<sub>28</sub>N<sub>3</sub>O<sub>6</sub>S<sup>+</sup> [M+NH<sub>4</sub>]<sup>+</sup>: 402.1693, found: 402.1691.

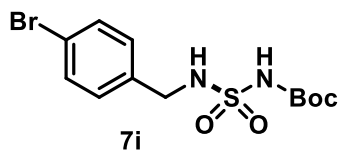

Yellow solid (48.0 mg, 66% yield) The product was purified by flash column chromatography on silica gel (eluent: dichloromethane/ammonia methanol = 10:1). **<sup>1</sup>H NMR** (400 MHz, Methanol-*d*<sub>4</sub>) δ 7.50 – 7.43 (m, 2H), 7.32 – 7.25 (m, 2H), 4.17 (s, 2H), 1.43 (s, 9H). **<sup>13</sup>C NMR** (101 MHz, Methanol-*d*<sub>4</sub>) δ 151.0, 136.7, 131.2, 129.7, 120.9, 81.8, 46.0, 26.9. HRMS (ESI): calc'd for C<sub>12</sub>H<sub>16</sub>BrN<sub>2</sub>O<sub>4</sub>S<sup>-</sup> [M-H]<sup>-</sup>: 363.0020, found: 363.0006.

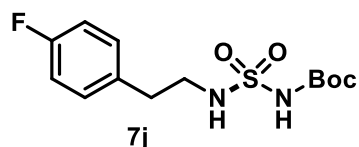

Yellow solid (44.5 mg, 70% yield) The product was purified by flash column chromatography on silica gel (eluent: dichloromethane/ammonia methanol = 10:1). **<sup>1</sup>H NMR** (400 MHz, Methanol-*d*<sub>4</sub>) δ 7.29 – 7.18 (m, 2H), 7.07 – 6.95 (m, 2H), 3.21 (t, *J* = 7.5 Hz, 2H), 2.83 (t, *J* = 7.5 Hz, 2H), 1.48 (s, 9H). **<sup>13</sup>C NMR** (101 MHz, Methanol-*d*<sub>4</sub>) δ 161.7 (d, *J* = 243.1 Hz), 151.3, 134.6 (d, *J* = 3.2 Hz), 130.1 (d, *J* = 8.0 Hz), 114.8 (d, *J* = 21.5 Hz), 81.9, 44.6, 34.5, 27.0. HRMS (ESI): calc'd for C<sub>13</sub>H<sub>18</sub>FN<sub>2</sub>O<sub>4</sub>S<sup>-</sup> [M-H]<sup>-</sup>: 317.0977, found: 317.0980.

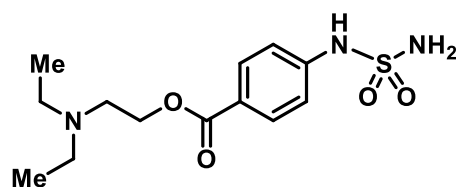

white-solid (42.75 mg, 75% yield) The product was purified by flash column chromatography on silica gel (eluent: dichloromethane/ammonia methanol = 6:1). **<sup>1</sup>H NMR** (400 MHz, Methanol-*d*<sub>4</sub>) δ 8.02 – 7.86 (m, 2H), 7.29 – 7.19 (m, 2H), 4.40 (t, *J* = 5.9 Hz, 2H), 2.90 (t, *J* = 5.9 Hz, 2H), 2.69 (q, *J* = 7.2 Hz, 4H), 1.10 (t, *J* = 7.2 Hz, 6H). **<sup>13</sup>C NMR** (101 MHz, Methanol-*d*<sub>4</sub>) δ 166.4, 144.0, 130.5, 123.3, 116.6, 62.2, 50.5, 10.2. HRMS calc'd for C<sub>13</sub>H<sub>22</sub>N<sub>3</sub>O<sub>4</sub>S<sup>+</sup> [M + H]<sup>+</sup> 316.1326, found 316.1317.

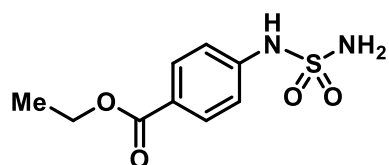

white-solid (40.50 mg, 83% yield) The product was purified by flash column chromatography on silica gel (eluent: dichloromethane/ammonia methanol = 10:1) **<sup>1</sup>H**

**NMR** (400 MHz, Methanol-*d*<sub>4</sub>)  $\delta$  7.96 – 7.87 (m, 2H), 7.27 – 7.17 (m, 2H), 4.31 (q, *J* = 7.1 Hz, 2H), 1.35 (t, *J* = 7.1 Hz, 3H). **<sup>13</sup>C NMR** (101 MHz, Methanol-*d*<sub>4</sub>)  $\delta$  166.6, 143.8, 130.4, 123.7, 116.6, 60.5, 13.2. HRMS calc'd for C<sub>9</sub>H<sub>13</sub>N<sub>2</sub>O<sub>4</sub>S<sup>+</sup> [M + H]<sup>+</sup> 245.0591, found 245.0581.

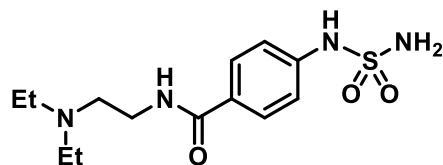

**9c**

white-solid (50.24 mg, 80% yield). The product was purified by flash column chromatography on silica gel (eluent: dichloromethane/ammonia methanol = 6:1). **<sup>1</sup>H NMR** (400 MHz, Methanol-*d*<sub>4</sub>)  $\delta$  7.90 – 7.74 (m, 2H), 7.42 – 7.07 (m, 2H), 3.72 (t, *J* = 6.1 Hz, 2H), 3.39 – 3.31 (m, 2H), 3.29 (q, *J* = 1.8 Hz, 4H), 1.33 (t, *J* = 7.3 Hz, 6H). **<sup>13</sup>C NMR** (151 MHz, Methanol-*d*<sub>4</sub>)  $\delta$  169.5, 143.1, 128.3, 126.4, 116.9, 51.9, 35.1, 7.8. HRMS calc'd for C<sub>13</sub>H<sub>23</sub>N<sub>4</sub>O<sub>3</sub>S<sup>+</sup> [M + H]<sup>+</sup> 315.1485, found 315.1479.

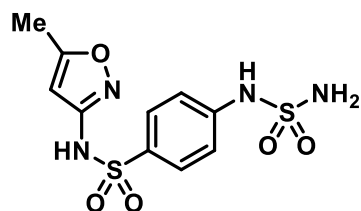

**9d**

white-solid (42.50 mg, 64% yield). The product was purified by preparative HPLC. **<sup>1</sup>H NMR** (400 MHz, Methanol-*d*<sub>4</sub>)  $\delta$  7.83 – 7.77 (m, 2H), 7.30 – 7.25 (m, 2H), 6.14 – 6.12 (m, 1H), 2.32 – 2.31 (m, 3H). **<sup>13</sup>C NMR** (101 MHz, Methanol-*d*<sub>4</sub>)  $\delta$  170.6, 157.9, 144.0, 132.3, 128.3, 116.8, 95.0, 10.9. HRMS calc'd for C<sub>10</sub>H<sub>13</sub>N<sub>4</sub>O<sub>5</sub>S<sub>2</sub><sup>+</sup> [M + H]<sup>+</sup> 333.0322, found 333.0313.

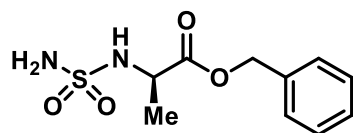

9e

white-solid (32.00 mg, 62% yield) The product was purified by flash column chromatography on silica gel (eluent: dichloromethane/ammonia methanol = 10:1). **<sup>1</sup>H NMR** (400 MHz, Methanol-*d*<sub>4</sub>) δ 7.54 – 7.17 (m, 5H), 5.22 – 5.15 (m, 2H), 4.10 (q, *J* = 7.2 Hz, 1H), 1.39 (d, *J* = 7.2 Hz, 3H). **<sup>13</sup>C NMR** (101 MHz, Methanol-*d*<sub>4</sub>) δ 173.4, 135.9, 128.2, 127.9, 127.9, 66.6, 51.7, 17.7. HRMS calc'd for C<sub>10</sub>H<sub>15</sub>N<sub>2</sub>O<sub>4</sub>S<sup>+</sup> [M + H]<sup>+</sup> 259.0747, found 259.0737.

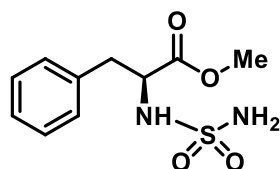

9f

white-solid (35.61 mg, 69% yield) The product was purified by flash column chromatography on silica gel (eluent: dichloromethane/ammonia methanol = 10:1) **<sup>1</sup>H NMR** (400 MHz, Methanol-*d*<sub>4</sub>) δ 7.35 – 7.17 (m, 5H), 4.23 (t, *J* = 7.0 Hz, 1H), 3.65 (s, 3H), 3.03 (d, *J* = 7.0 Hz, 2H). **<sup>13</sup>C NMR** (101 MHz, Methanol-*d*<sub>4</sub>) δ 172.8, 136.4, 129.1, 128.1, 126.6, 57.4, 51.3, 38.5. HRMS calc'd for C<sub>10</sub>H<sub>13</sub>N<sub>2</sub>O<sub>4</sub>S<sup>-</sup> [M - H]<sup>-</sup> 257.0602, found 257.0602.

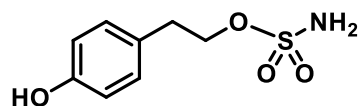

11a

10a (0.2 mmol), 1 (0.4 mmol) and dry dichloromethane (3 mL) were added to the reaction vessel at room temperature, and the mixture was stirred for 3.2 hours. After the completion of the reaction was indicated by TLC, the solvent was evaporated, anhydrous acetonitrile (3 mL) was added, and HCl (12M) in water (0.5 mL) was added

dropwise at room temperature. The mixture was concentrated under reduced pressure. Saturated aqueous Na<sub>2</sub>CO<sub>3</sub> (50 mL) was added to the residue, and the resulting mixture was extracted with EA. The combined organic layer was dried over Na<sub>2</sub>SO<sub>4</sub> and concentrated under reduced pressure. By comparing with the raw material NMR data and mass spectrum data, the correctness of the structure is proved. white-solid (34.72 mg, 80% yield). The product was purified by flash column chromatography on silica gel (eluent: dichloromethane/ammonia methanol = 6:1). **<sup>1</sup>H NMR** (400 MHz, Methanol-*d*<sub>4</sub>) δ 7.11 – 7.02 (m, 2H), 6.75 – 6.70 (m, 2H), 4.24 (t, *J* = 7.1 Hz, 2H), 2.91 (t, *J* = 7.1 Hz, 2H). **<sup>13</sup>C NMR** (101 MHz, Methanol-*d*<sub>4</sub>) δ 155.8, 129.6, 127.8, 114.9, 70.3, 34.1 HRMS calc'd for C<sub>8</sub>H<sub>10</sub>NO<sub>4</sub>S<sup>-</sup> [M - H]<sup>-</sup> 216.0336, found 216.0338.

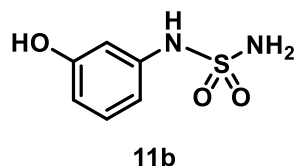

10b (0.2 mmol), 1 (0.3 mmol) and dry dichloromethane (3 mL) were added to the reaction vessel at room temperature, and the mixture was stirred for 3.4 hours. After the completion of the reaction was indicated by TLC, the solvent was evaporated, anhydrous acetonitrile (3 mL) was added, and HCl (12M) in water (0.5 mL) was added dropwise at room temperature. The mixture was concentrated under reduced pressure. Saturated aqueous Na<sub>2</sub>CO<sub>3</sub> (50 mL) was added to the residue, and the resulting mixture was extracted with EA. The combined organic layer was dried over Na<sub>2</sub>SO<sub>4</sub> and concentrated under reduced pressure. By comparing with the raw material NMR data and mass spectrum data, the correctness of the structure is proved white-solid (28.20 mg, 75% yield) The product was purified by flash column chromatography on silica gel (eluent: dichloromethane/ammonia methanol = 7:1). **<sup>1</sup>H NMR** (400 MHz, Methanol-*d*<sub>4</sub>) δ 7.08 (t, *J* = 8.1 Hz, 1H), 6.75 – 6.72 (m, 1H), 6.70 – 6.65 (m, 1H), 6.53 – 6.44 (m, 1H). **<sup>13</sup>C NMR** (101 MHz, Methanol-*d*<sub>4</sub>) δ 157.7, 140.0, 129.4, 110.4, 110.0, 106.3. HRMS calc'd for C<sub>6</sub>H<sub>9</sub>N<sub>2</sub>O<sub>3</sub>S<sup>+</sup> [M + H]<sup>+</sup> 189.0328, found 189.0328.

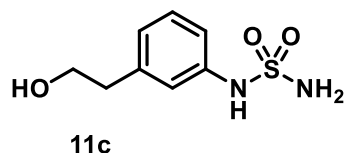

10c (0.2 mmol), 1 (0.2 mmol) and dry dichloromethane (3 mL) were added to the reaction vessel at room temperature, and the mixture was stirred for 1.5 hours, 1(0.1 mmol) was added. After the completion of the reaction was indicated by TLC, the solvent was evaporated, anhydrous acetonitrile (3 mL) was added, and HCl (12M) in water (0.5 mL) was added dropwise at room temperature. The mixture was concentrated under reduced pressure. Saturated aqueous Na<sub>2</sub>CO<sub>3</sub> (50 mL) was added to the residue, and the resulting mixture was extracted with EA. The combined organic layer was dried over Na<sub>2</sub>SO<sub>4</sub> and concentrated under reduced pressure. By comparing with the raw material NMR data and mass spectrum data, the correctness of the structure is proved .white-solid (33.70 mg, 78% yield) The product was purified by flash column chromatography on silica gel (eluent: dichloromethane/ammonia methanol = 7:1) **<sup>1</sup>H NMR** (400 MHz, Methanol-*d*<sub>4</sub>) δ 7.25 – 7.18 (m, 1H), 7.13 – 7.04 (m, 2H), 6.97 – 6.91 (m, 1H), 3.76 (t, *J* = 7.0 Hz, 2H), 2.80 (t, *J* = 7.0 Hz, 2H). **<sup>13</sup>C NMR** (101 MHz, Methanol-*d*<sub>4</sub>) δ 140.1, 138.9, 128.6, 123.7, 119.9, 117.2, 62.7, 38.8. HRMS calc'd for C<sub>8</sub>H<sub>16</sub>N<sub>3</sub>O<sub>3</sub>S<sup>+</sup> [M + NH<sub>4</sub>]<sup>+</sup> 234.0907 , found 234.0908.

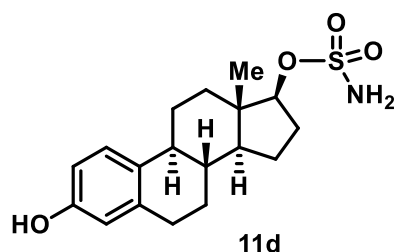

10d (0.2 mmol), 1 (0.3 mmol) and dry dichloromethane (3 mL) were added to the reaction vessel at room temperature, and the mixture was stirred for 3 hours. After the completion of the reaction was indicated by TLC, the solvent was evaporated, anhydrous acetonitrile (3 mL) was added, and HCl (12M) in water (0.5 mL) was added dropwise at room temperature. The mixture was concentrated under reduced pressure. Saturated aqueous Na<sub>2</sub>CO<sub>3</sub> (50 mL) was added to the residue, and the resulting mixture

was extracted with EA. The combined organic layer was dried over Na<sub>2</sub>SO<sub>4</sub> and concentrated under reduced pressure. By comparing with the raw material NMR data and mass spectrum data, the correctness of the structure is proved .white-solid (49.16 mg, 70% yield) The product was purified by flash column chromatography on silica gel (eluent: dichloromethane/ammonia methanol = 10:1) **<sup>1</sup>H NMR** (400 MHz, Methanol-*d*<sub>4</sub>) δ 7.06 (d, *J* = 8.5 Hz, 1H), 6.54 (dd, *J* = 8.4, 2.7 Hz, 1H), 6.47 (d, *J* = 2.7 Hz, 1H), 4.44 – 4.38 (m, 1H), 2.83 – 2.70 (m, 2H), 2.32 – 2.20 (m, 2H), 2.16 – 2.00 (m, 2H), 1.88 – 1.71 (m, 3H), 1.46 – 1.24 (m, 6H), 0.84 (s, 3H). **<sup>13</sup>C NMR** (101 MHz, Methanol-*d*<sub>4</sub>) δ 154.6, 137.4, 130.9, 125.9, 114.7, 112.4, 88.8, 49.1, 43.7, 43.0, 38.8, 36.3, 29.2, 27.5, 27.0, 26.0, 22.6, 10.8. HRMS calc'd for C<sub>18</sub>H<sub>26</sub>NO<sub>4</sub>S<sup>+</sup> [M + H]<sup>+</sup> 352.1577 , found 352.1572.

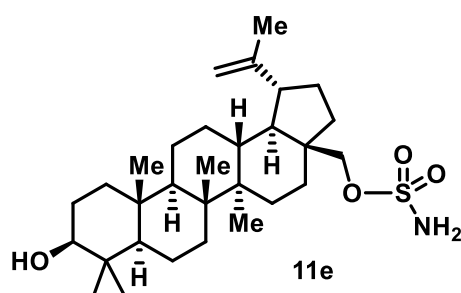

10e (0.2 mmol), 1 (0.4 mmol) and dry dichloromethane (3 mL) were added to the reaction vessel at room temperature, and the mixture was stirred for 3 hours. After the completion of the reaction was indicated by TLC, the solvent was evaporated, anhydrous acetonitrile (3 mL) was added, and HCl (12M) in water (0.5 mL) was added dropwise at room temperature. The mixture was concentrated under reduced pressure. Saturated aqueous Na<sub>2</sub>CO<sub>3</sub> (50 mL) was added to the residue, and the resulting mixture was extracted with EA. The combined organic layer was dried over Na<sub>2</sub>SO<sub>4</sub> and concentrated under reduced pressure. By comparing with the raw material NMR data and mass spectrum data, the correctness of the structure is proved . white-solid (64.60 mg, 62% yield) The product was purified by flash column chromatography on silica gel (eluent: dichloromethane/ammonia methanol = 10:1) **<sup>1</sup>H NMR** (400 MHz, DMSO-*d*<sub>6</sub>)

$\delta$  7.43 (s, 2H), 4.73 – 4.68 (m, 1H), 4.60 – 4.55 (m, 1H), 4.28 (d,  $J$  = 5.1 Hz, 1H), 4.12 (d,  $J$  = 9.6 Hz, 1H), 3.75 (d,  $J$  = 9.6 Hz, 1H), 3.02 – 2.89 (m, 1H), 2.45 – 2.37 (m, 1H), 2.03 – 1.85 (m, 1H), 1.84 – 1.53 (m, 10H), 1.48 – 1.22 (m, 10H), 1.19 – 0.94 (m, 10H), 0.88 – 0.75 (m, 7H), 0.70 – 0.60 (m, 4H).  **$^{13}\text{C}$  NMR** (151 MHz, DMSO- $d_6$ )  $\delta$  149.1, 109.5, 76.2, 66.7, 54.2, 49.1, 47.5, 46.6, 45.4, 41.6, 39.8, 37.9, 37.6, 36.6, 36.1, 33.1, 33.0, 28.2, 28.2, 27.5, 26.6, 25.8, 24.1, 19.7, 18.1, 17.3, 15.3, 15.2, 15.1, 13.9. HRMS calc'd for  $\text{C}_{30}\text{H}_{51}\text{ClNO}_4\text{S}^- [\text{M} + \text{Cl}]^-$  556.3233, found 556.3243.

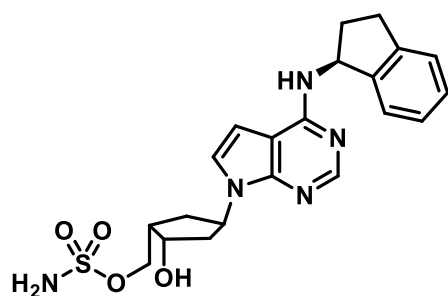

11f

10f (0.2 mmol), 1 (0.4 mmol) and dry acetonitrile (3 mL) were added to the reaction vessel at room temperature, and the mixture was stirred for 3 hours. After the completion of the reaction indicated by TLC, HCl (12M) in water (0.5 mL) was added dropwise and the mixture was stirred for 8 hours. After the completion of the reaction indicated by TLC, the mixture was concentrated under reduced pressure. Saturated aqueous  $\text{Na}_2\text{CO}_3$  (50 mL) was added to the residue, and the resulting mixture was extracted with EA. The organic layer was dried over  $\text{Na}_2\text{SO}_4$  and concentrated under reduced pressure. The residue was purified by flash column chromatography on silica gel. By comparing with the raw material NMR data and mass spectrum data, the correctness of the structure is proved. white-solid (34.72 mg, 80% yield). The product was purified by flash column chromatography on silica gel (eluent: dichloromethane/ammonia methanol = 10:1). colorless-solid (80% yield).  **$^1\text{H}$  NMR** (400 MHz, Methanol- $d_4$ )  $\delta$  8.18 (s, 1H), 7.29 – 7.01 (m, 5H), 6.64 (d,  $J$  = 3.6 Hz, 1H), 5.85 (t,  $J$  = 7.7 Hz, 1H), 5.53 – 5.35 (m, 1H), 4.54 – 4.45 (m, 1H), 4.43 – 4.33 (m, 1H), 4.29 – 4.15 (m, 1H), 3.10 – 2.97 (m, 1H), 2.96 – 2.73 (m, 2H), 2.68 – 2.57 (m, 1H), 2.42 – 2.14 (m, 3H), 2.09 – 1.92 (m, 2H).  **$^{13}\text{C}$  NMR** (101 MHz, Methanol- $d_4$ )  $\delta$  156.4,



---

150.6, 148.6, 143.8, 143.2, 127.4, 126.2, 124.3, 123.8, 121.2, 103.4, 99.1, 71.6, 69.4, 55.5, 52.6, 43.3, 42.1, 33.5, 33.2, 29.7. **ESI:**  $m/z [M + H]^+$  : 444.2 The characterization data were consistent with the literature<sup>1</sup>.

## 9. Copies of NMR spectra data

$^1\text{H}$  (400 MHz, Chloroform-*d*) and  $^{13}\text{C}$  (101 MHz, Chloroform-*d*) spectra of compound 1

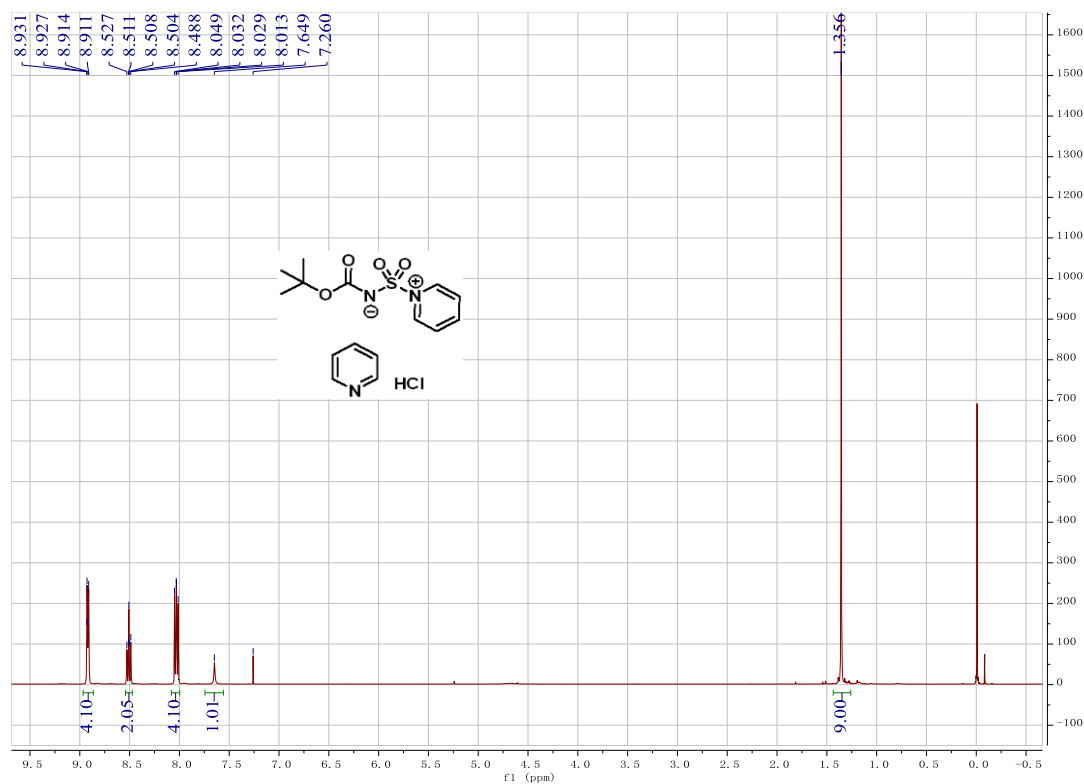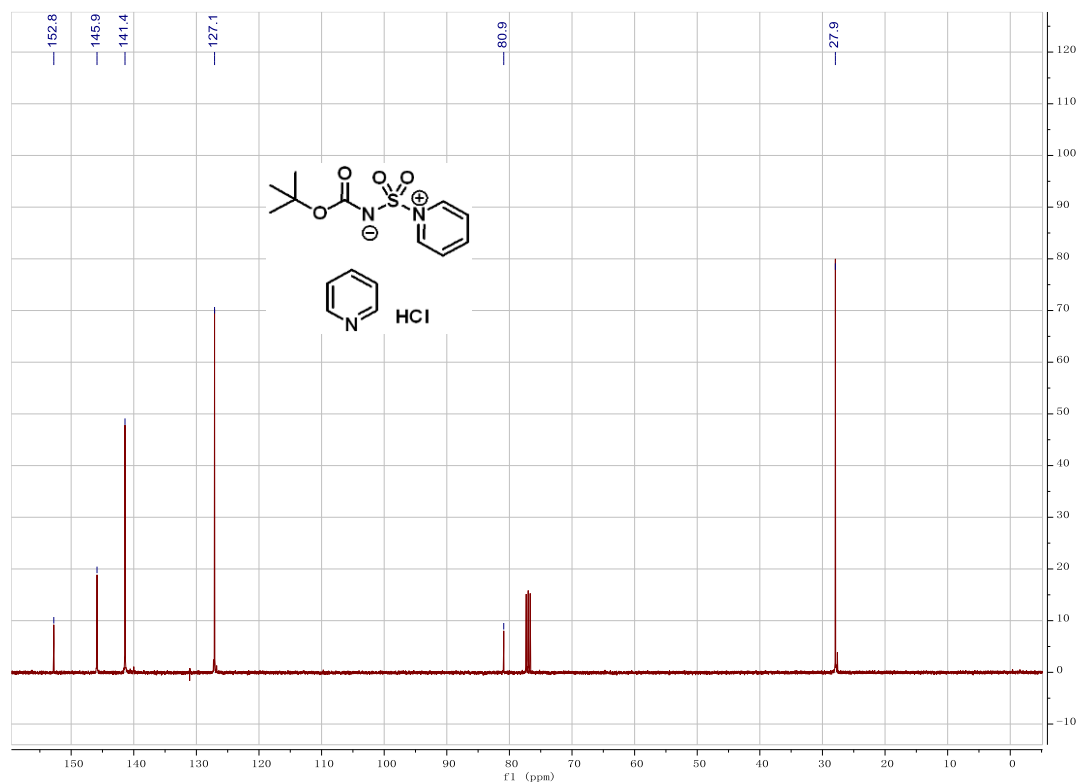

**$^1\text{H}$  (400 MHz, Chloroform-*d*) and  $^{13}\text{C}$  (101 MHz, Chloroform-*d*) spectra of compound 3a**

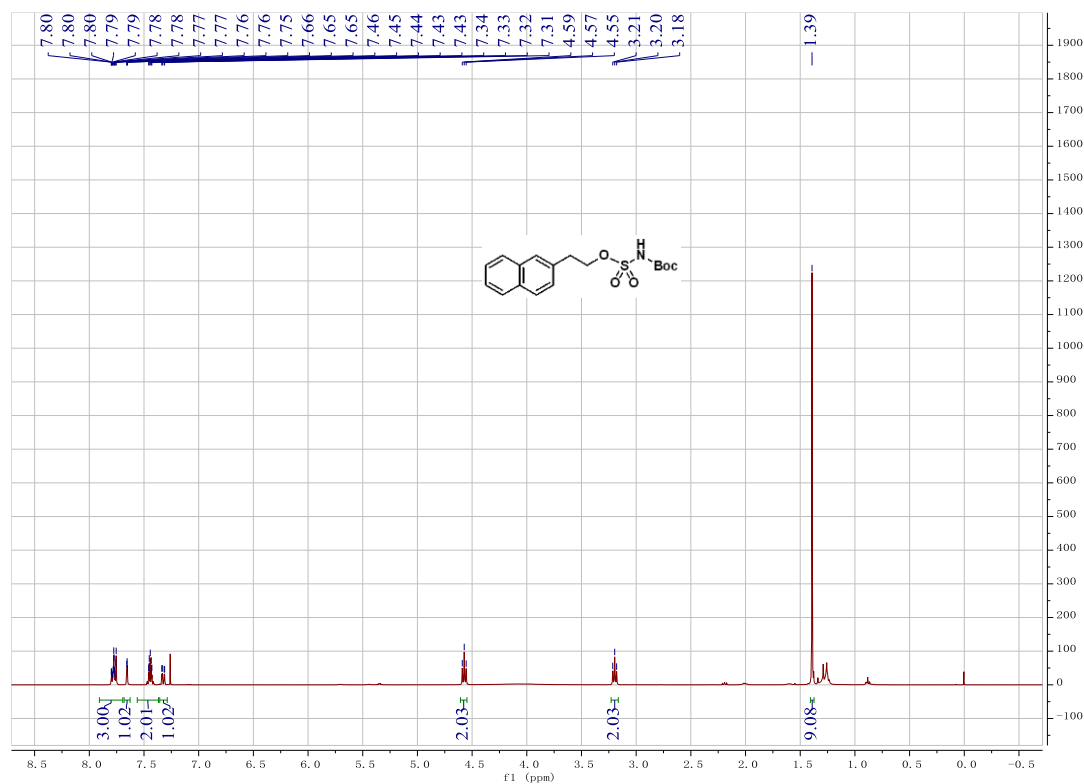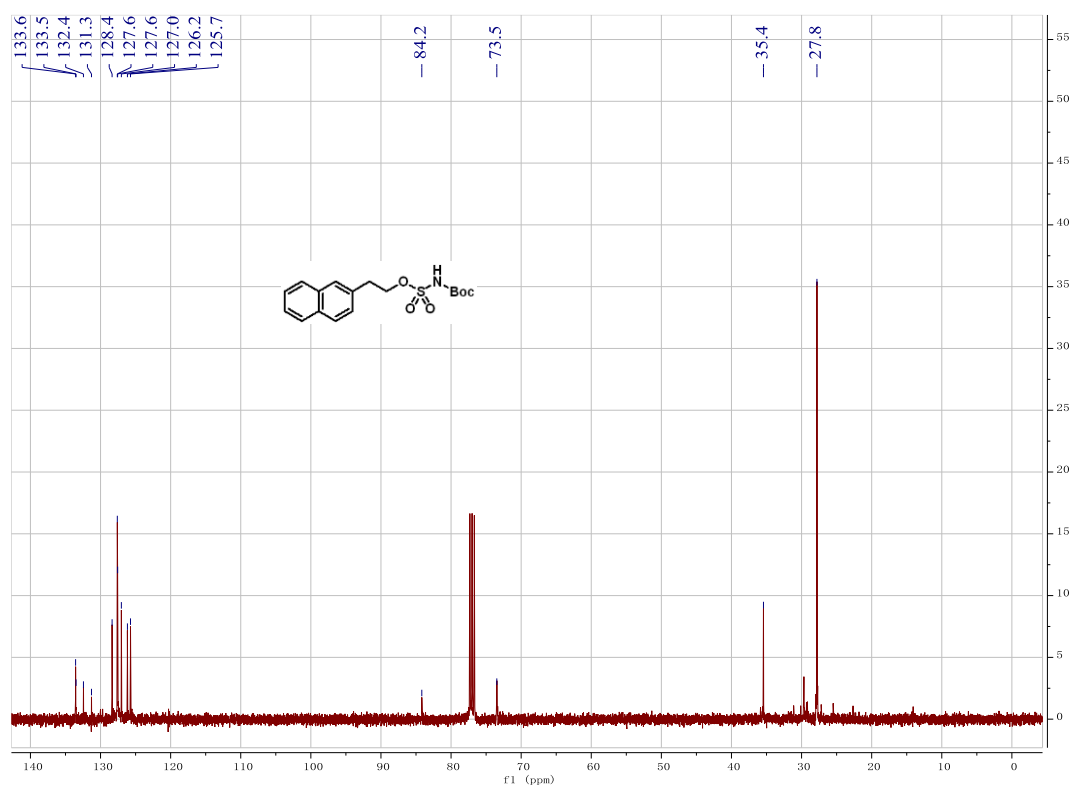

**$^1\text{H}$  (400 MHz, Acetonitrile- $d_3$ ) and  $^{13}\text{C}$  (101 MHz, Acetonitrile- $d_3$ ) spectra of compound 3b**

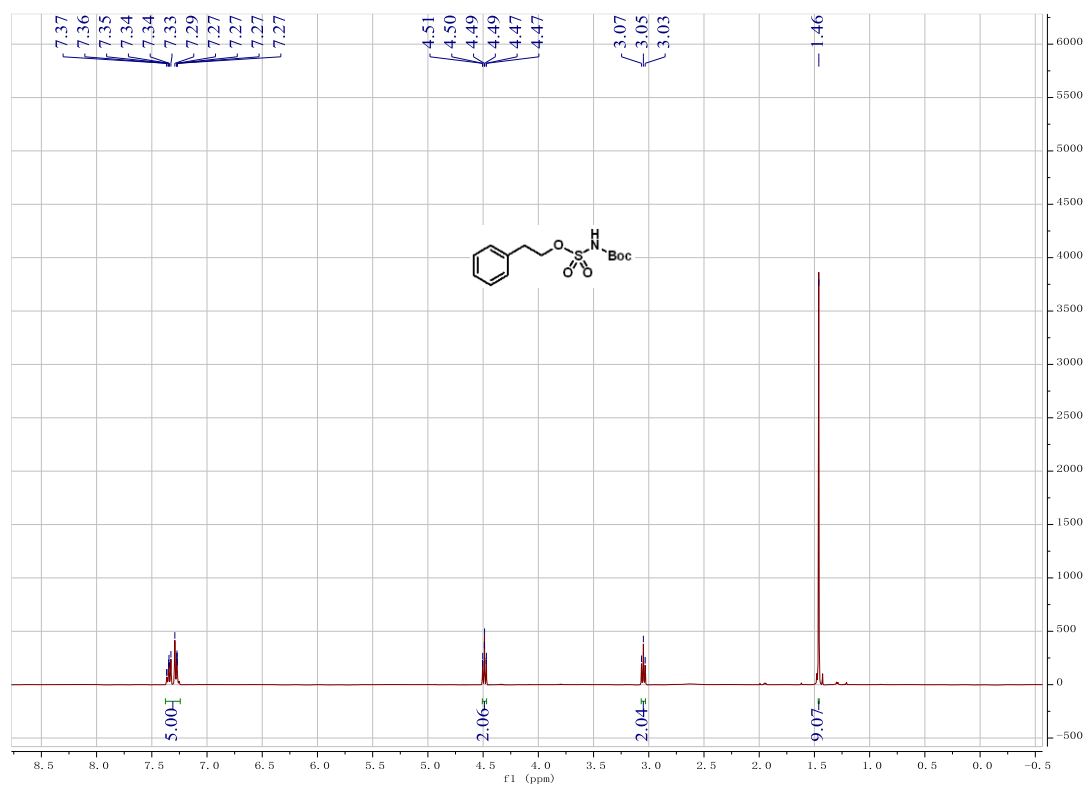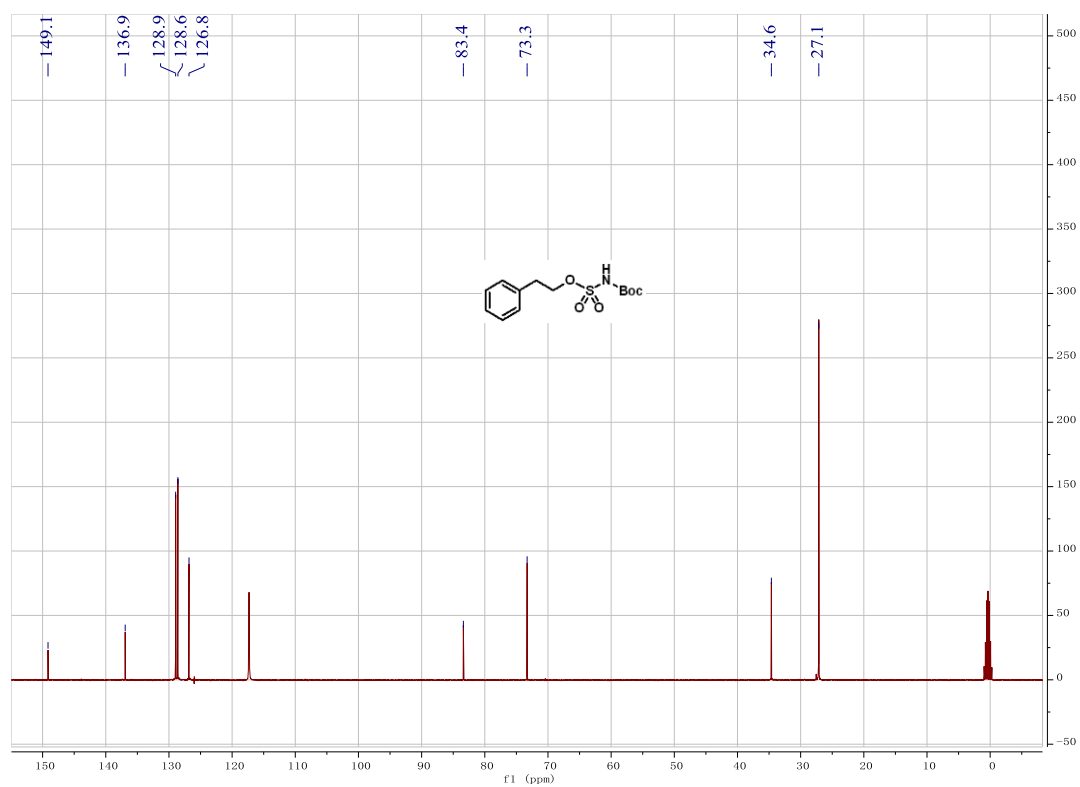

**$^1\text{H}$  (400 MHz, Acetonitrile- $d_3$ ) and  $^{13}\text{C}$  (400 MHz, Acetonitrile- $d_3$ ) spectra of compound **3c****

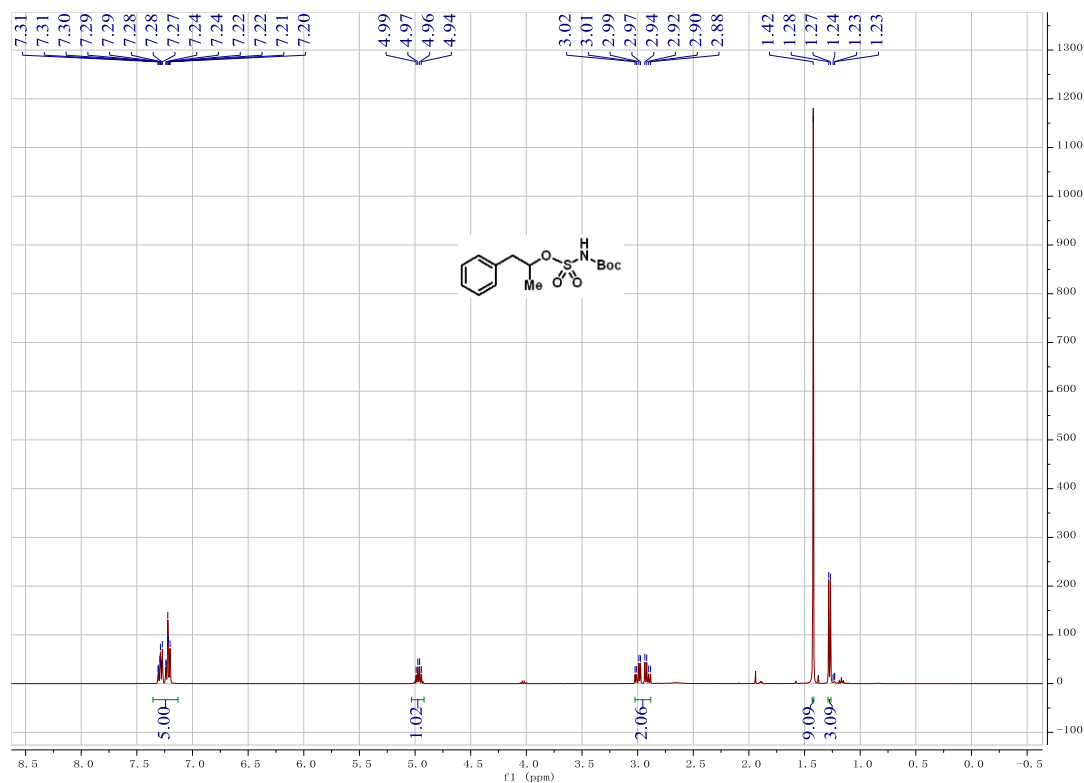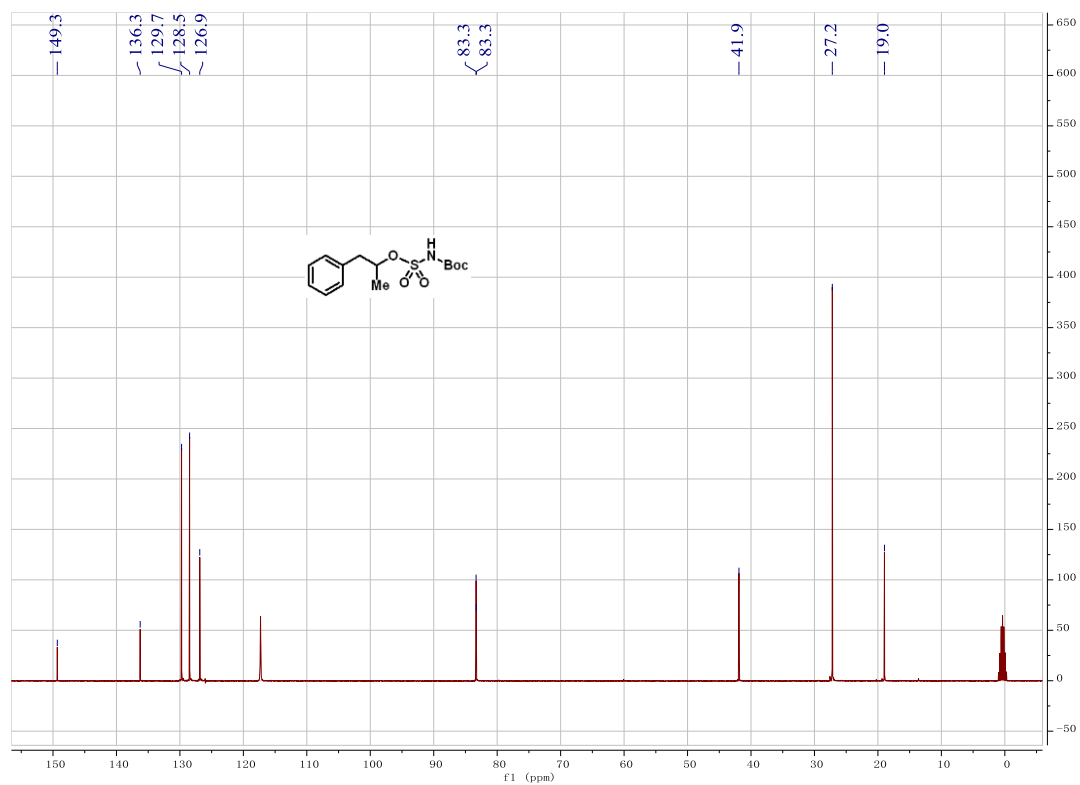

**$^1\text{H}$  (400 MHz, Methanol- $d_4$ ) and  $^{13}\text{C}$  (101 MHz, Methanol- $d_4$ ) spectra of compound 3d**

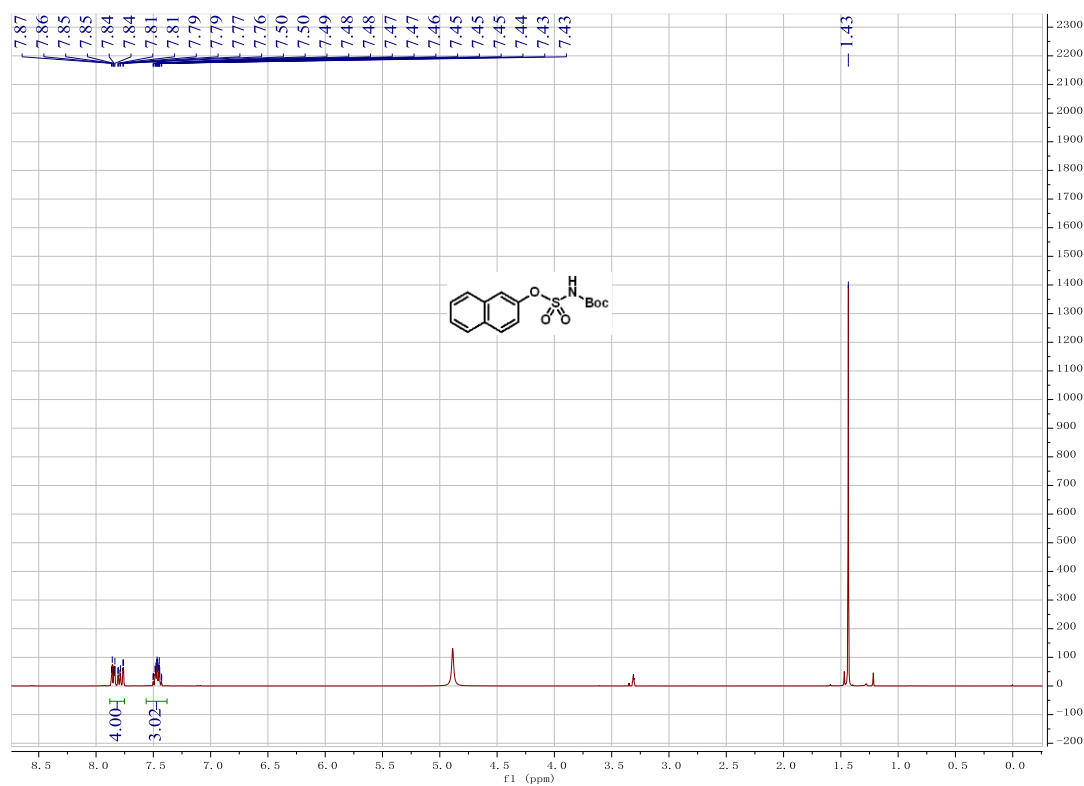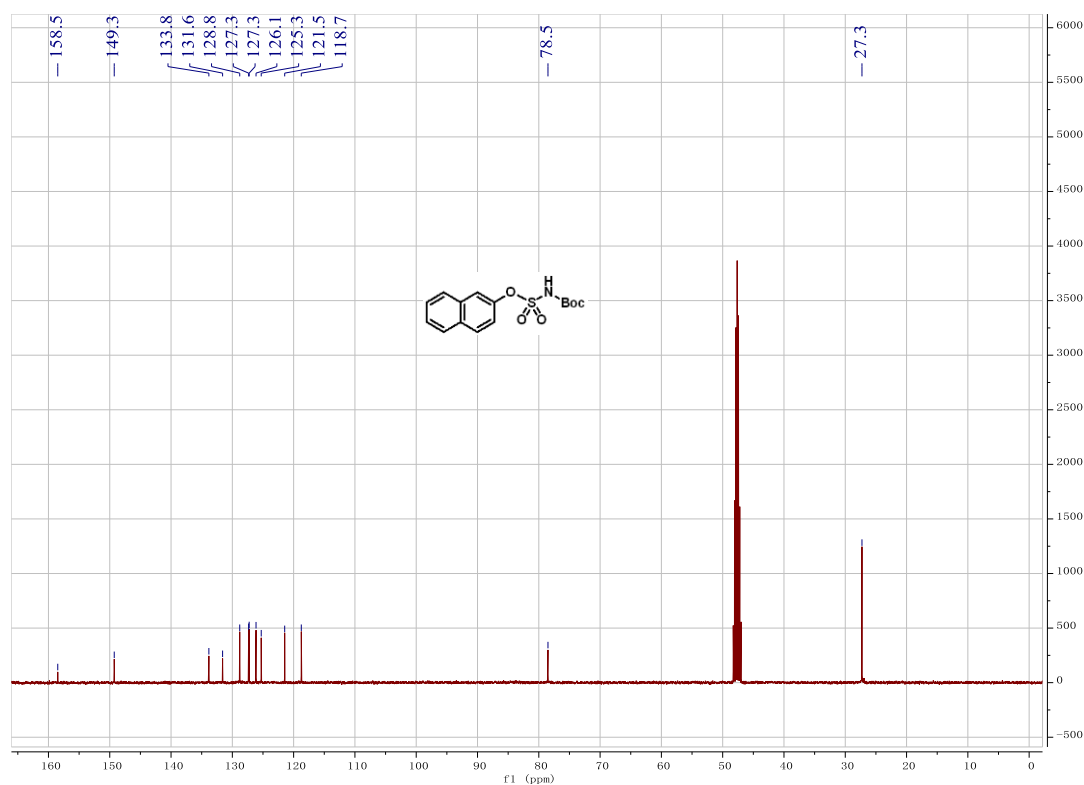

**$^1\text{H}$  (400 MHz, Chloroform-*d*) and  $^{13}\text{C}$  (101 MHz, Chloroform-*d*) spectra of compound 3e**

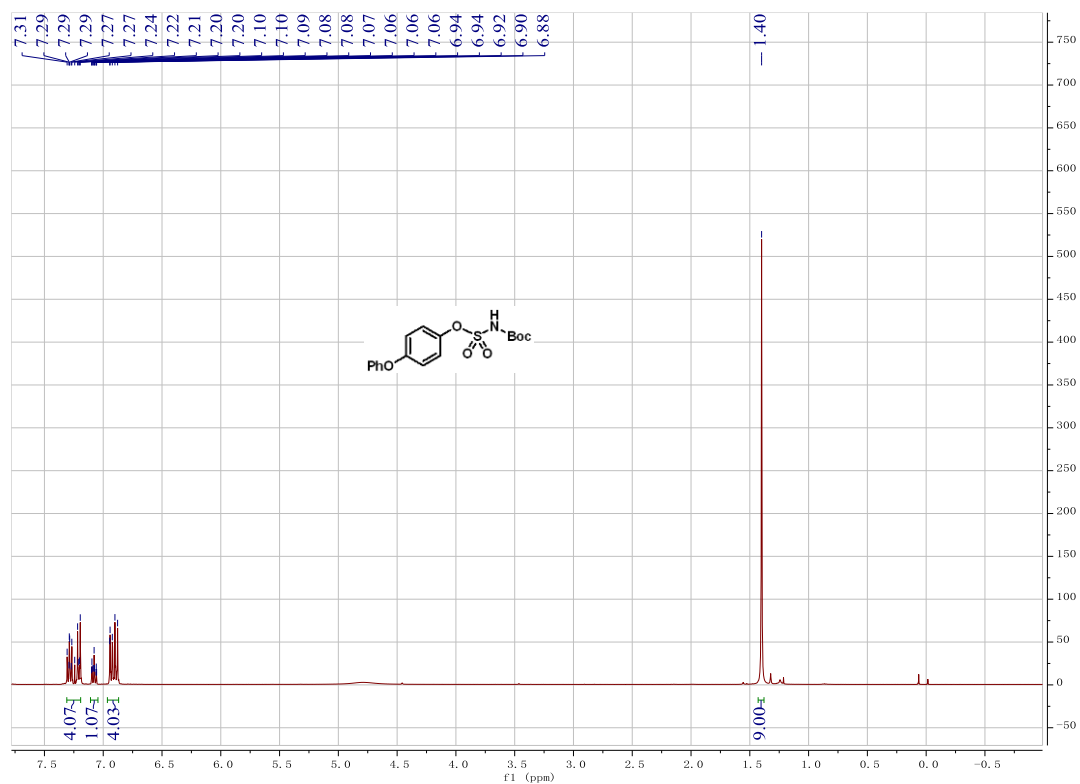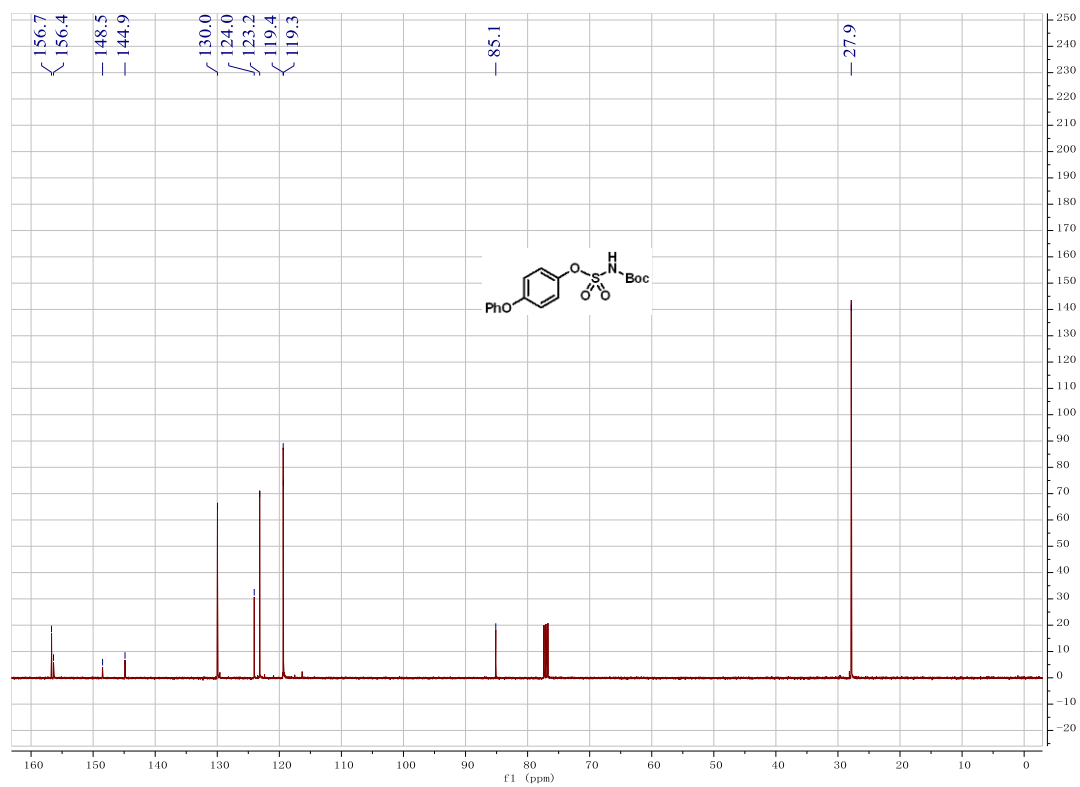

**$^1\text{H}$  (400 MHz, Methanol- $d_4$ ) and  $^{13}\text{C}$  (101 MHz, Methanol- $d_4$ ) spectra of compound 3f**

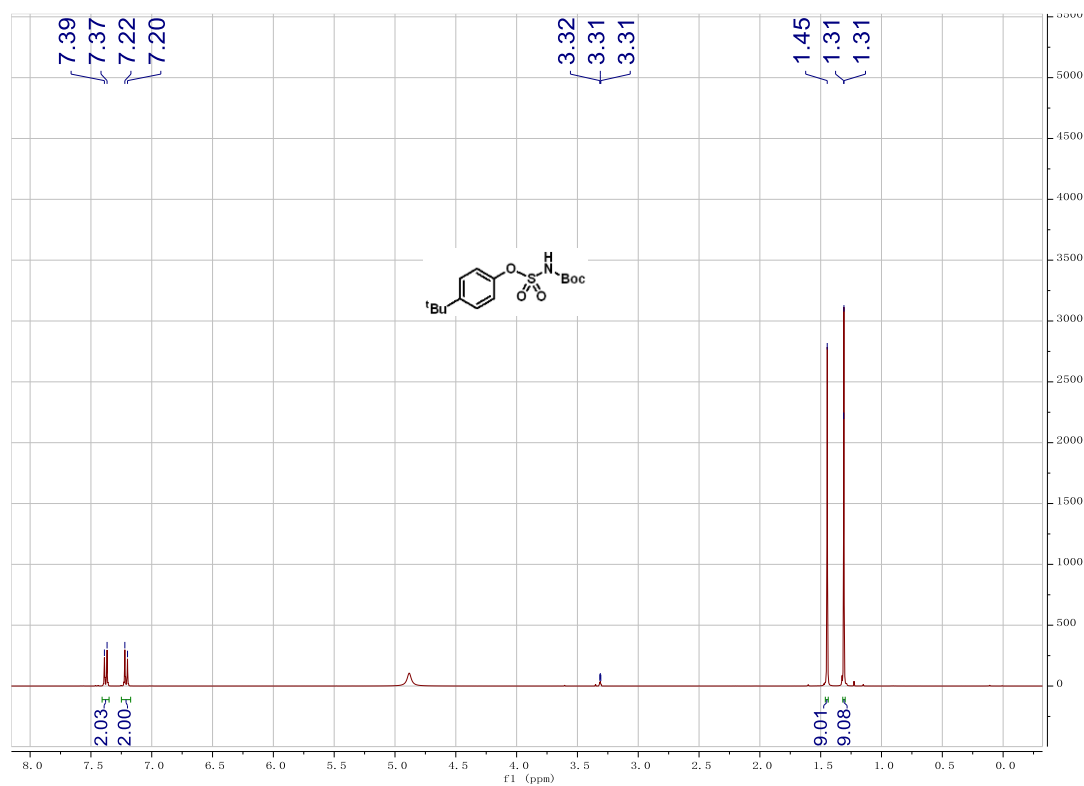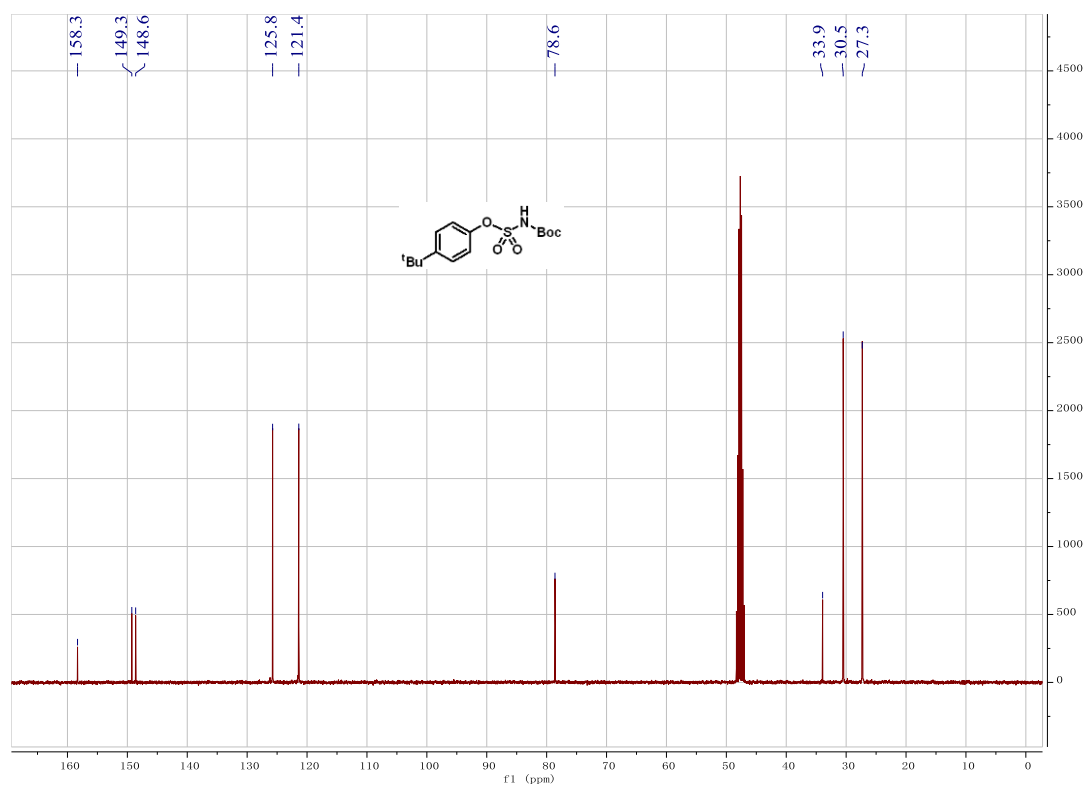



**$^1\text{H}$  (400 MHz, Methanol- $d_4$ ) and  $^{13}\text{C}$  (101 MHz, Methanol- $d_4$ ) spectra of compound 3g**

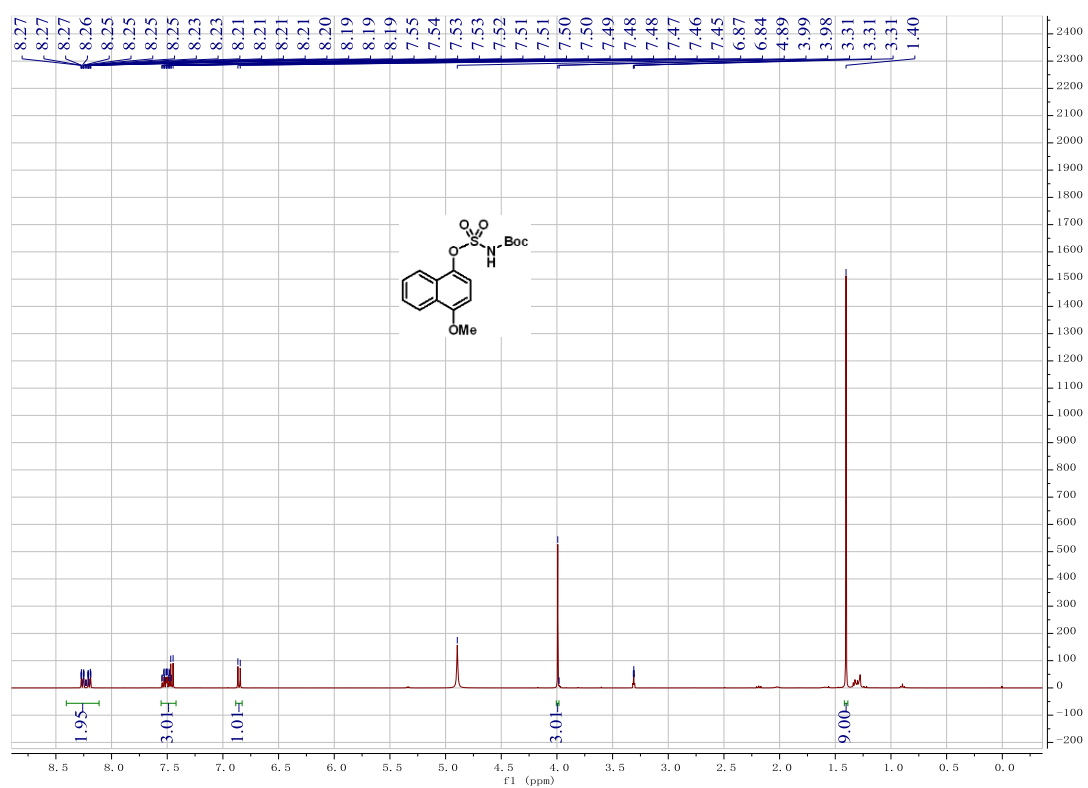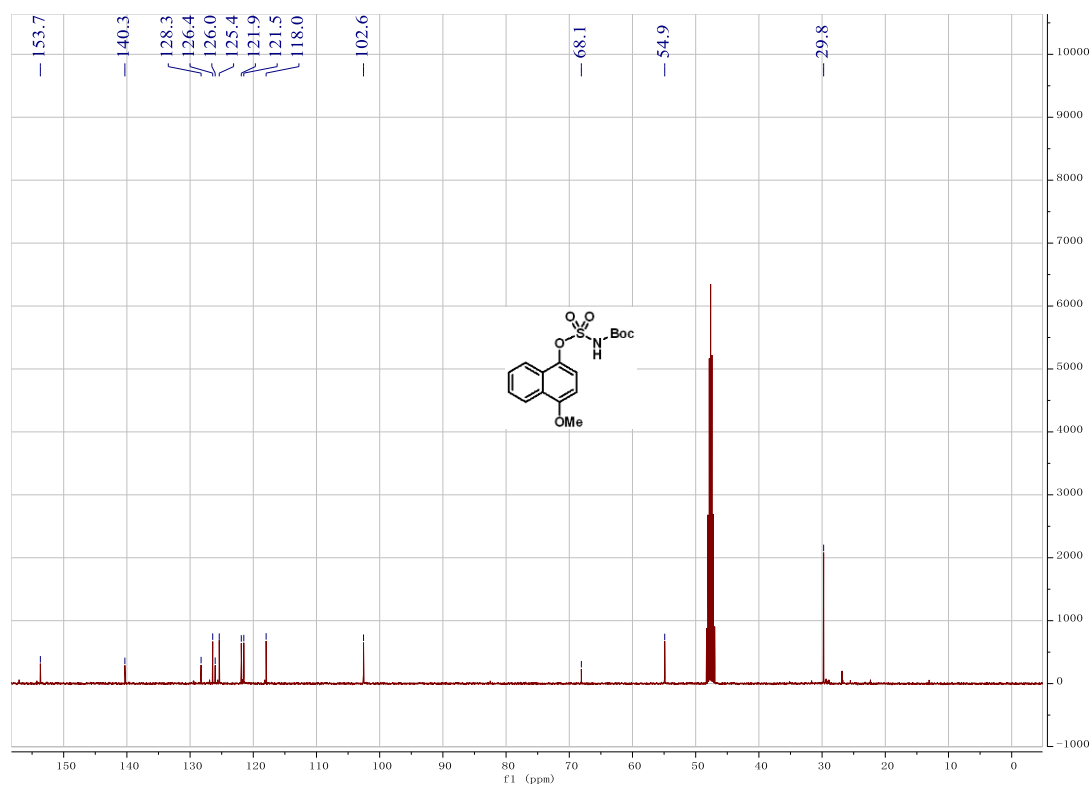

**$^1\text{H}$  (400 MHz, Methanol- $d_4$ ) and  $^{13}\text{C}$  (400 MHz, Methanol- $d_4$ ) spectra of compound 3h**

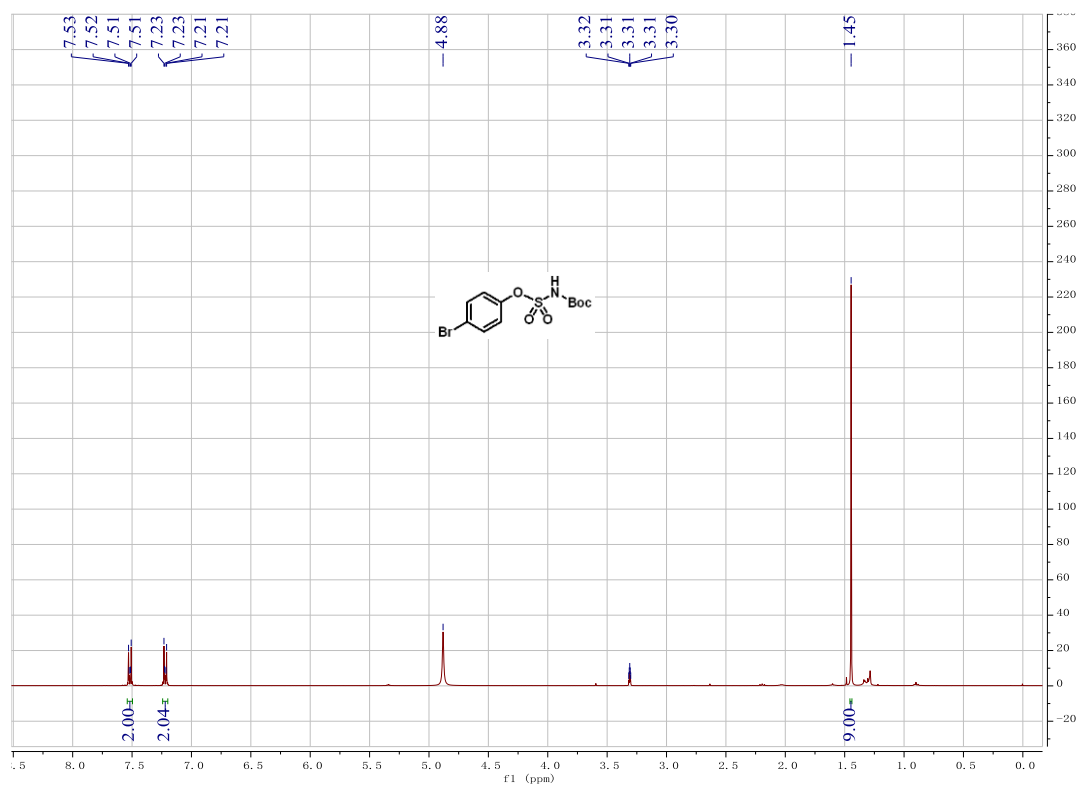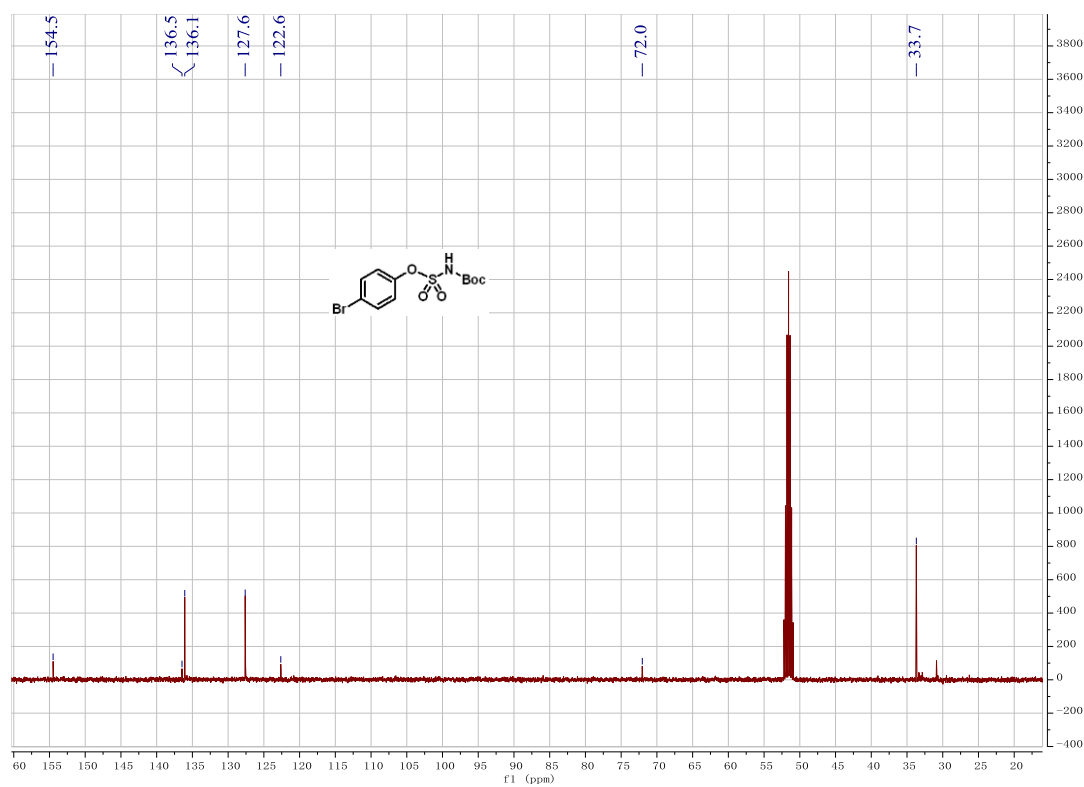

**$^1\text{H}$  (400 MHz, Acetonitrile- $d_3$ ) and  $^{13}\text{C}$  (101 MHz, Acetonitrile- $d_3$ ) spectra of compound 3i**

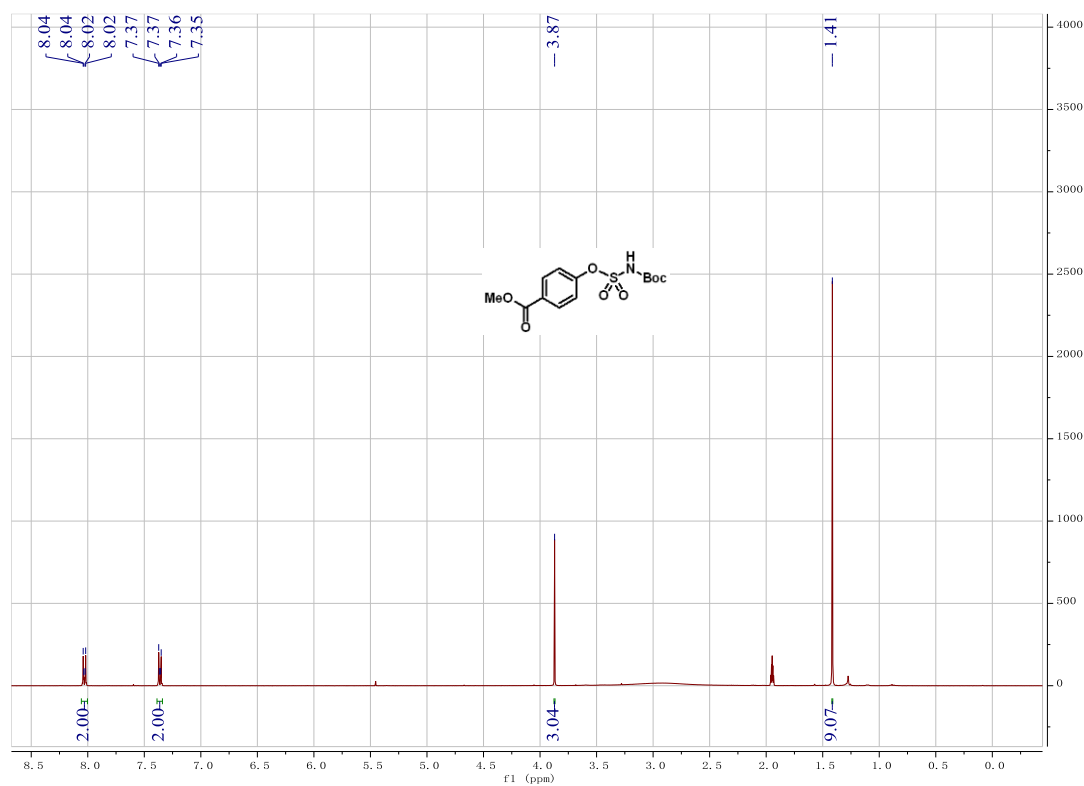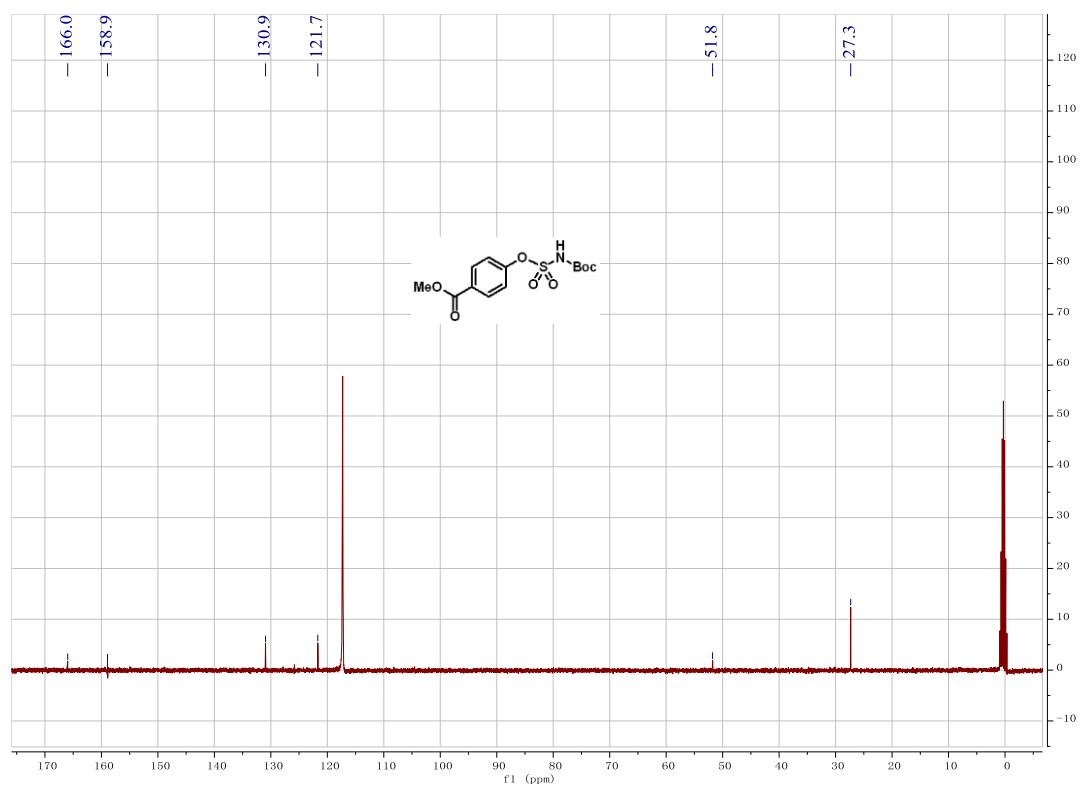

**$^1\text{H}$  (400 MHz, Chloroform-*d*) and  $^{13}\text{C}$  (101 MHz, Chloroform-*d*) spectra of compound 3j**

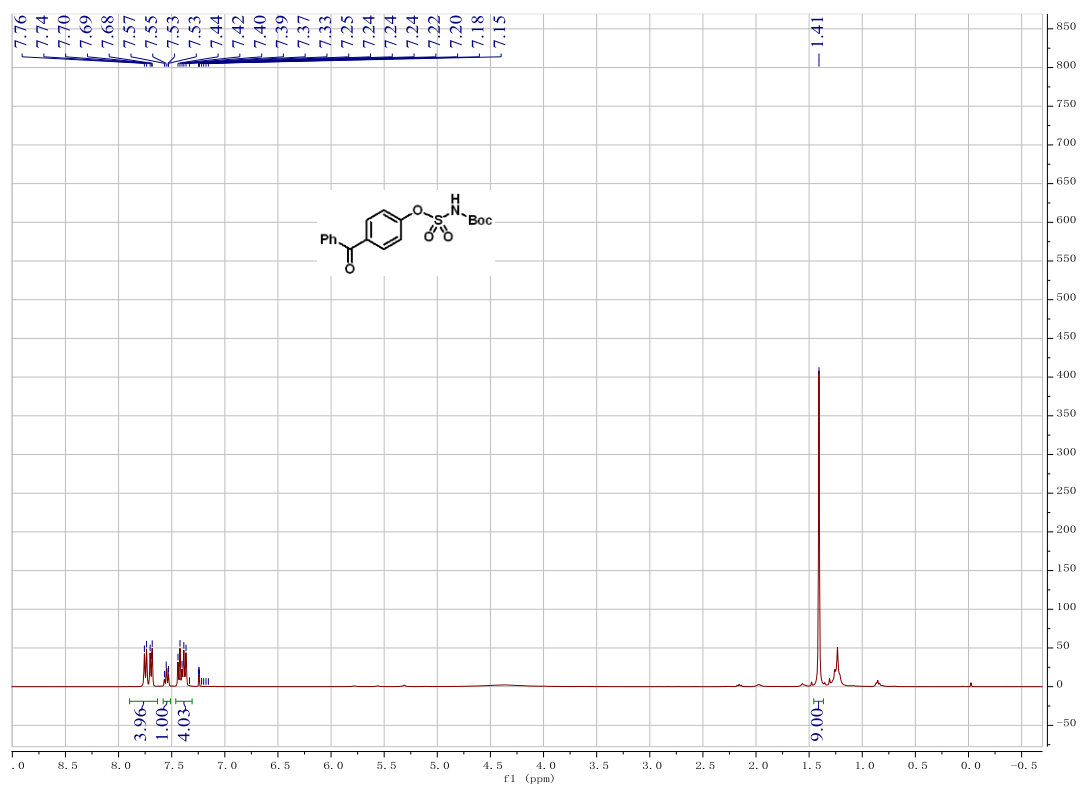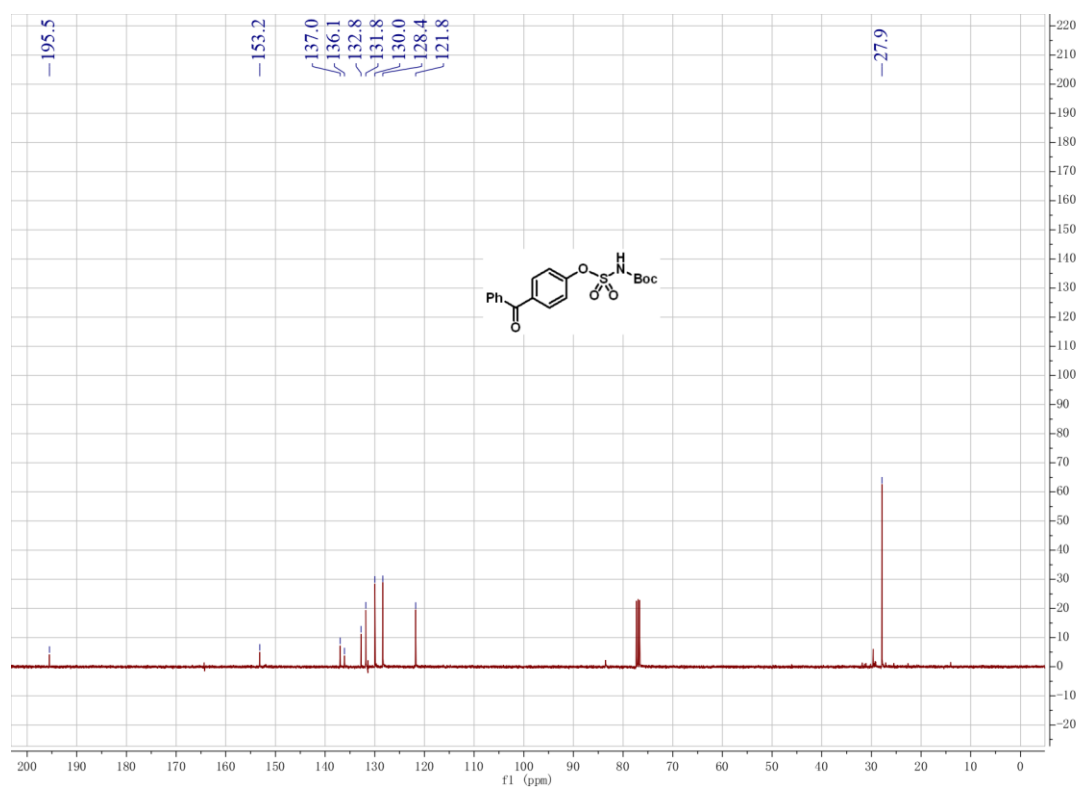

**$^1\text{H}$  (400 MHz, Methanol- $d_4$ ) and  $^{13}\text{C}$  (101 MHz, Methanol- $d_4$ ) spectra of compound 5a**

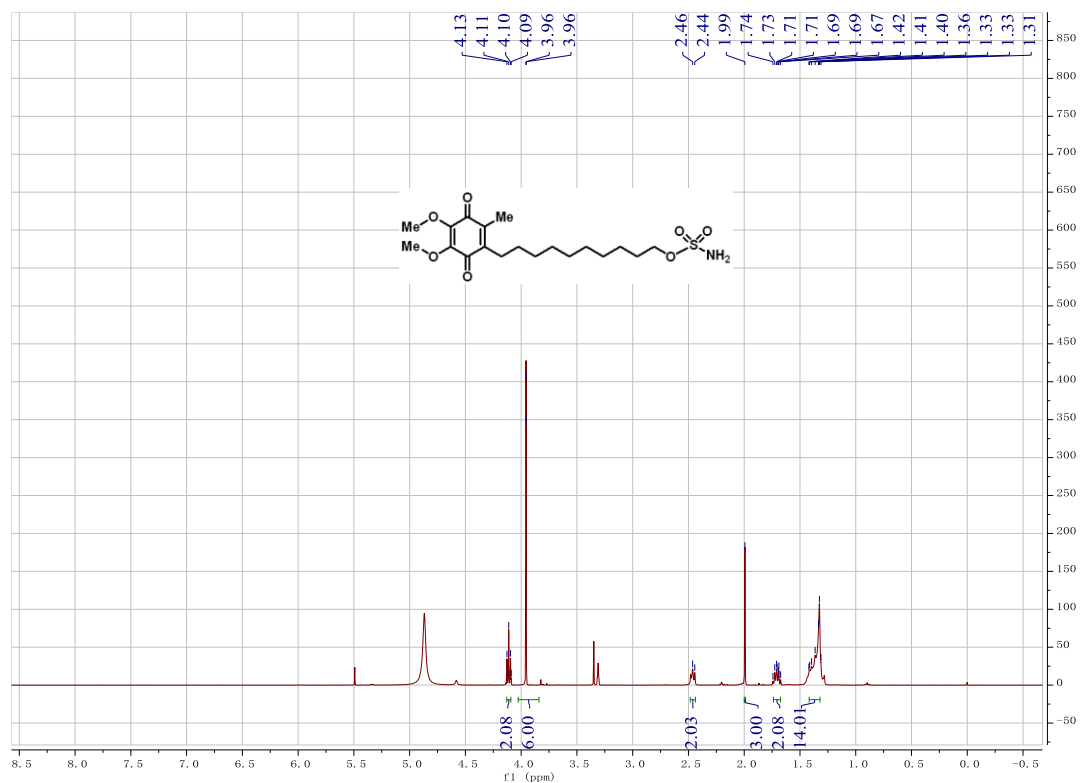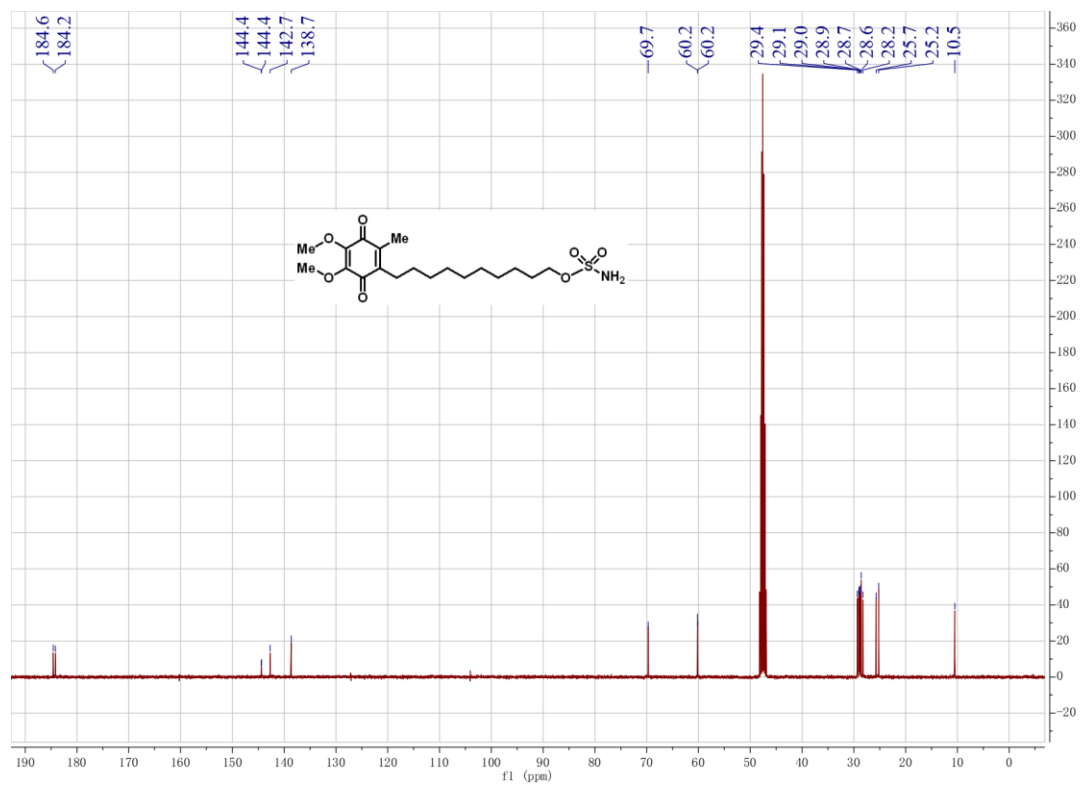

**$^1\text{H}$  (400 MHz, Methanol- $d_4$ ) and  $^{13}\text{C}$  (101 MHz, Methanol- $d_4$ ) spectra of compound 5b**

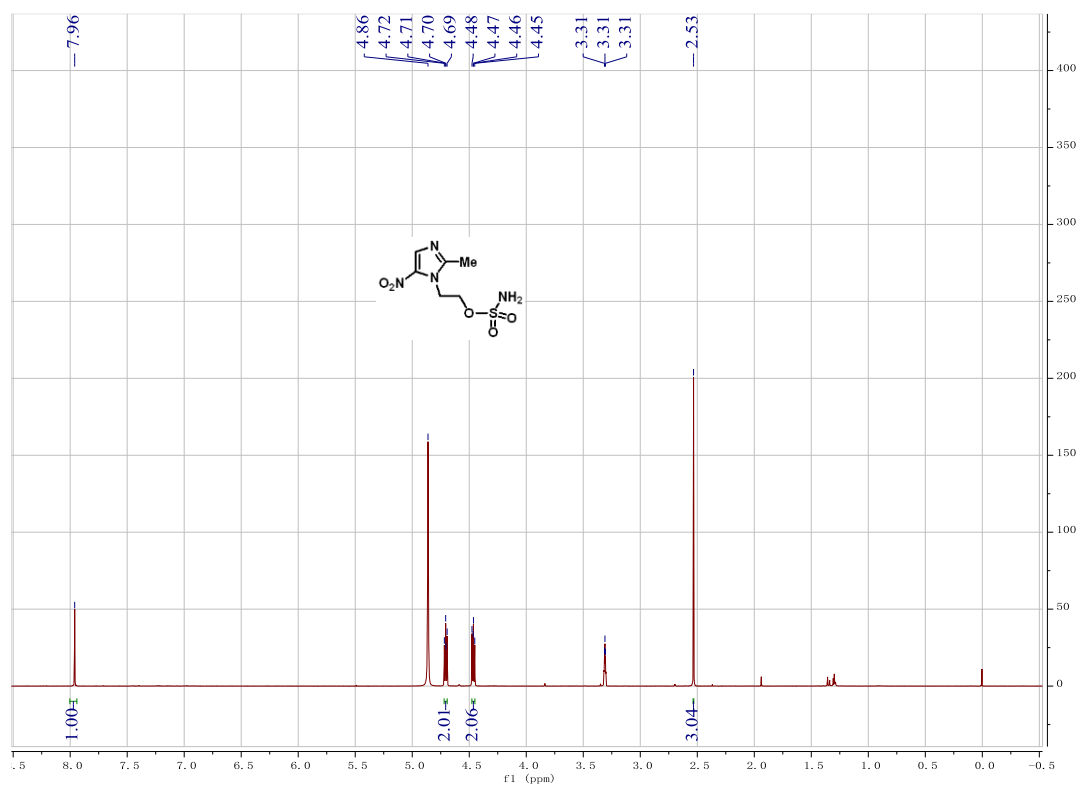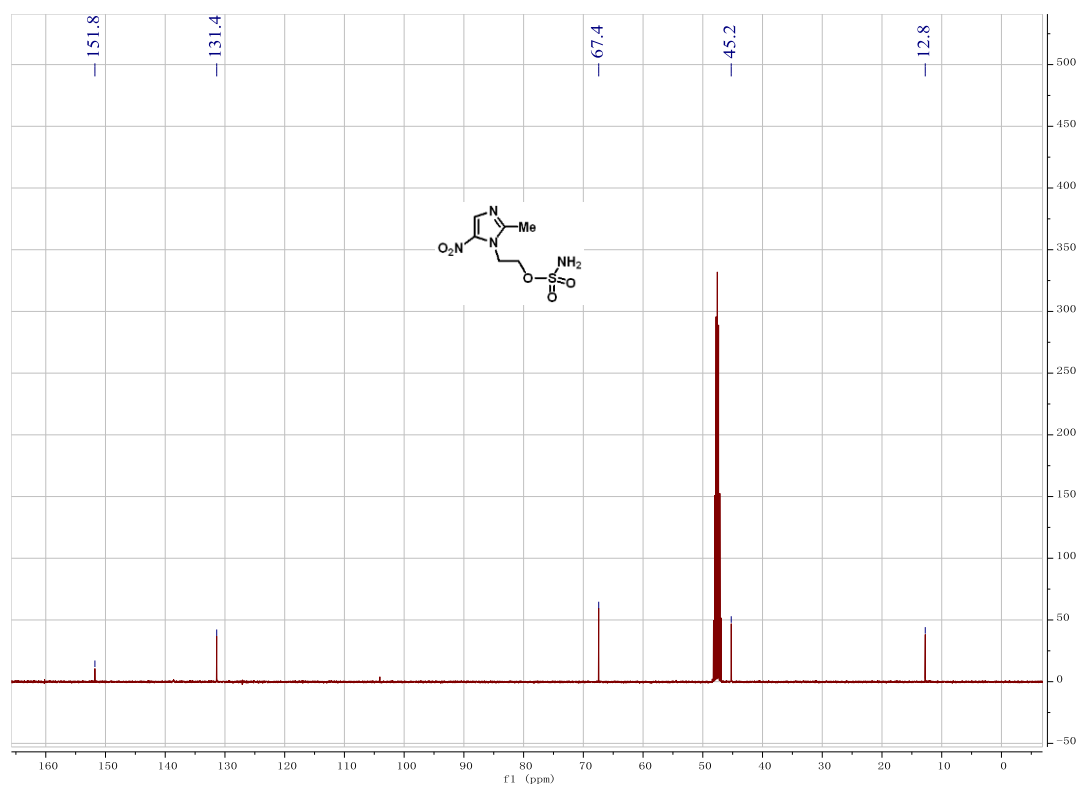

**$^1\text{H}$  (400 MHz, Methanol- $d_4$ ) and  $^{13}\text{C}$  (101 MHz, Methanol- $d_4$ ) spectra of compound 5c**

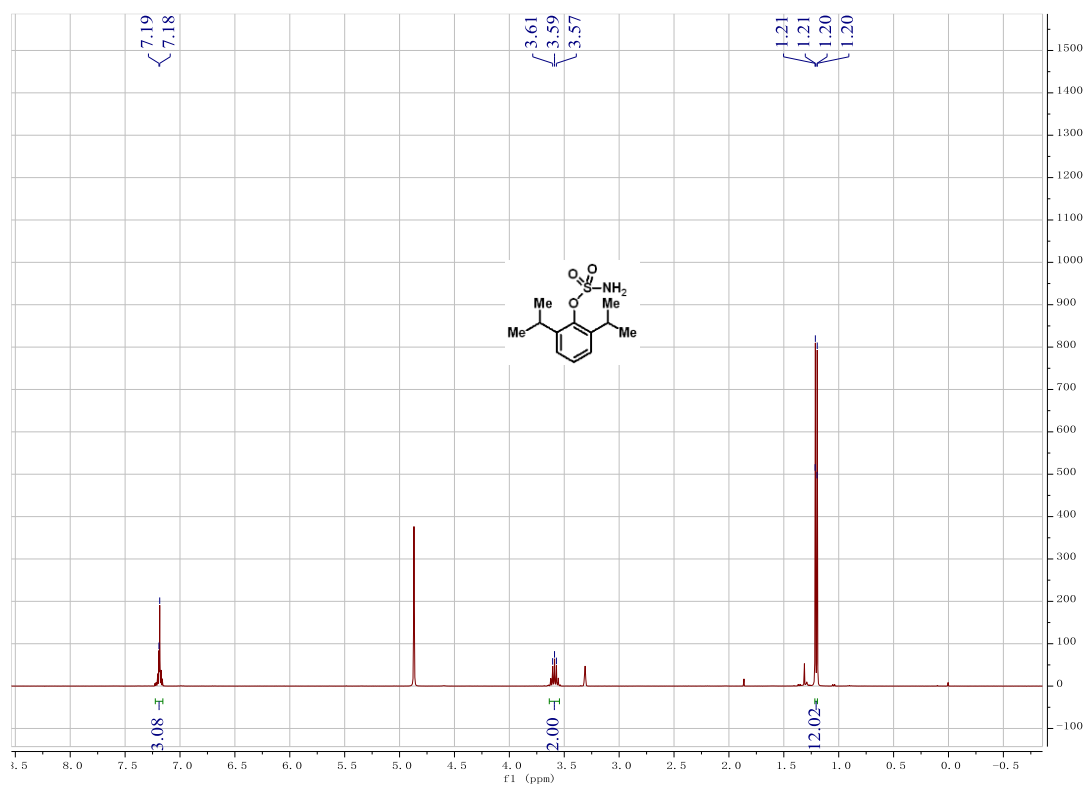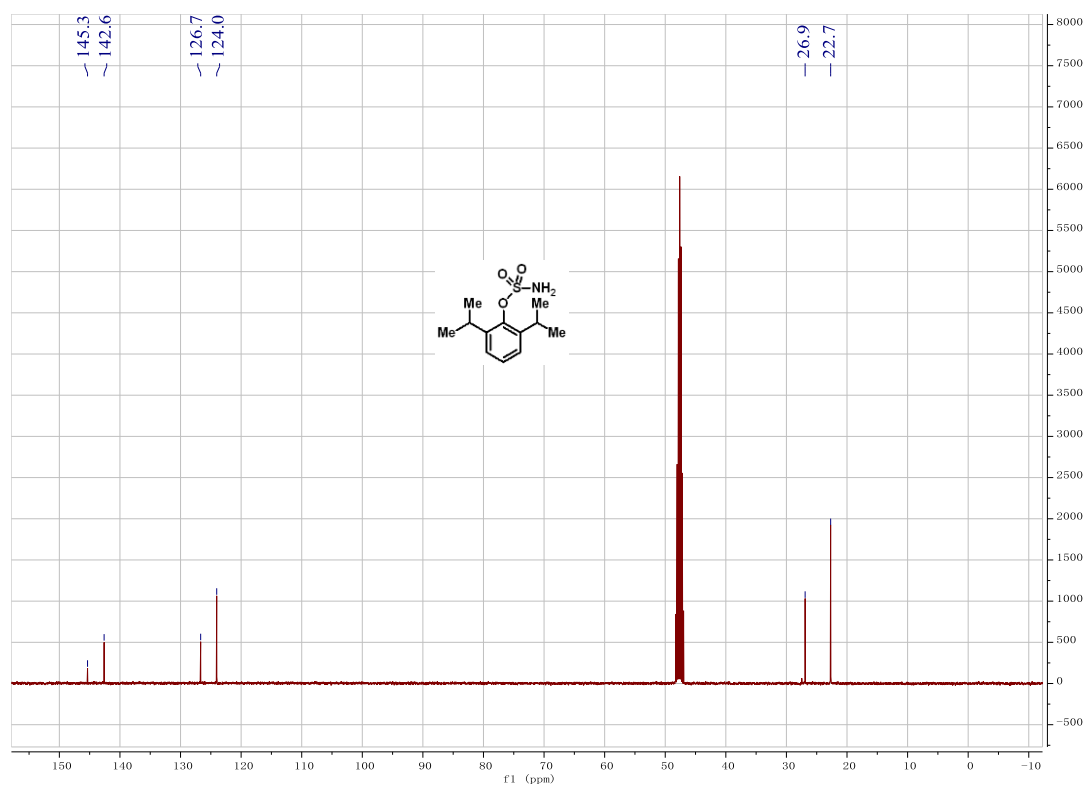

**$^1\text{H}$  (400 MHz, Methanol- $d_4$ ) and  $^{13}\text{C}$  (101 MHz, Methanol- $d_4$ ) spectra of compound 5d**

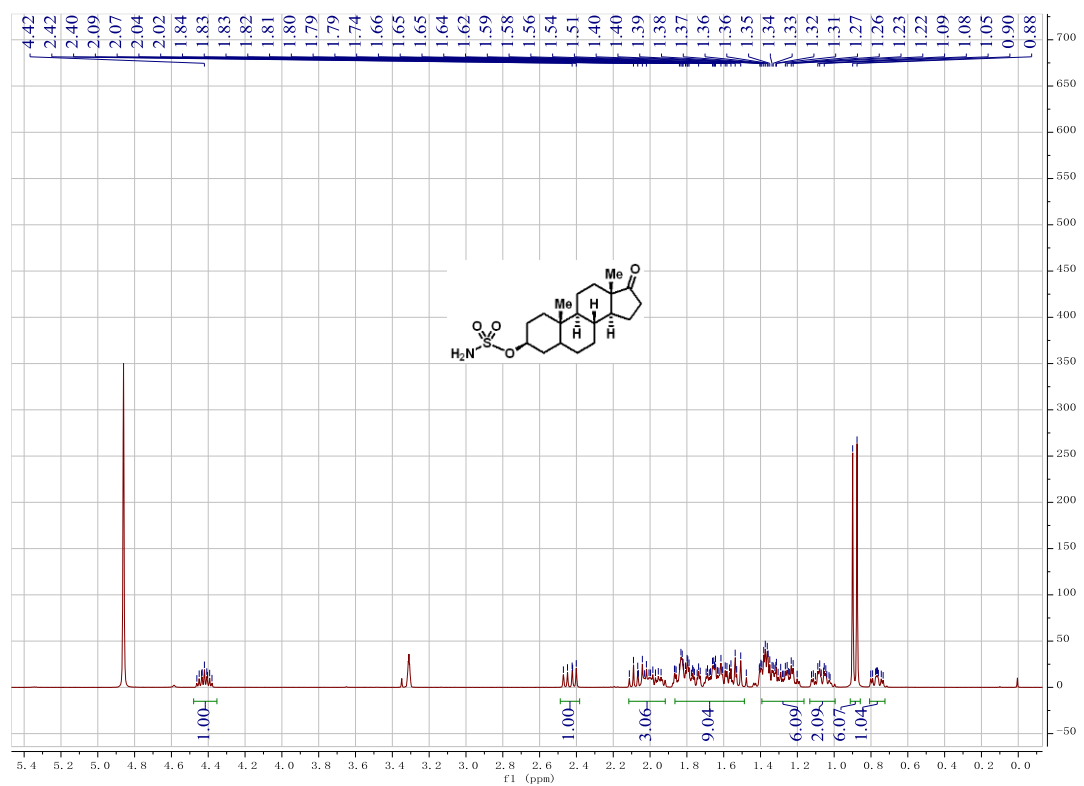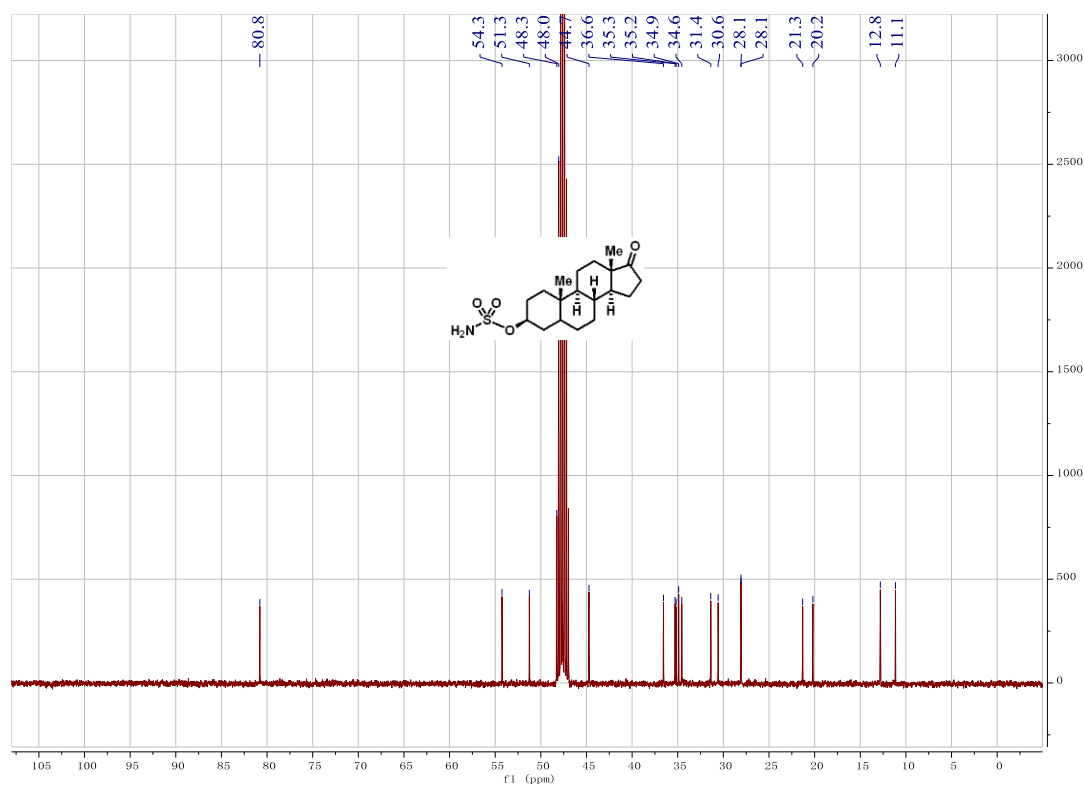



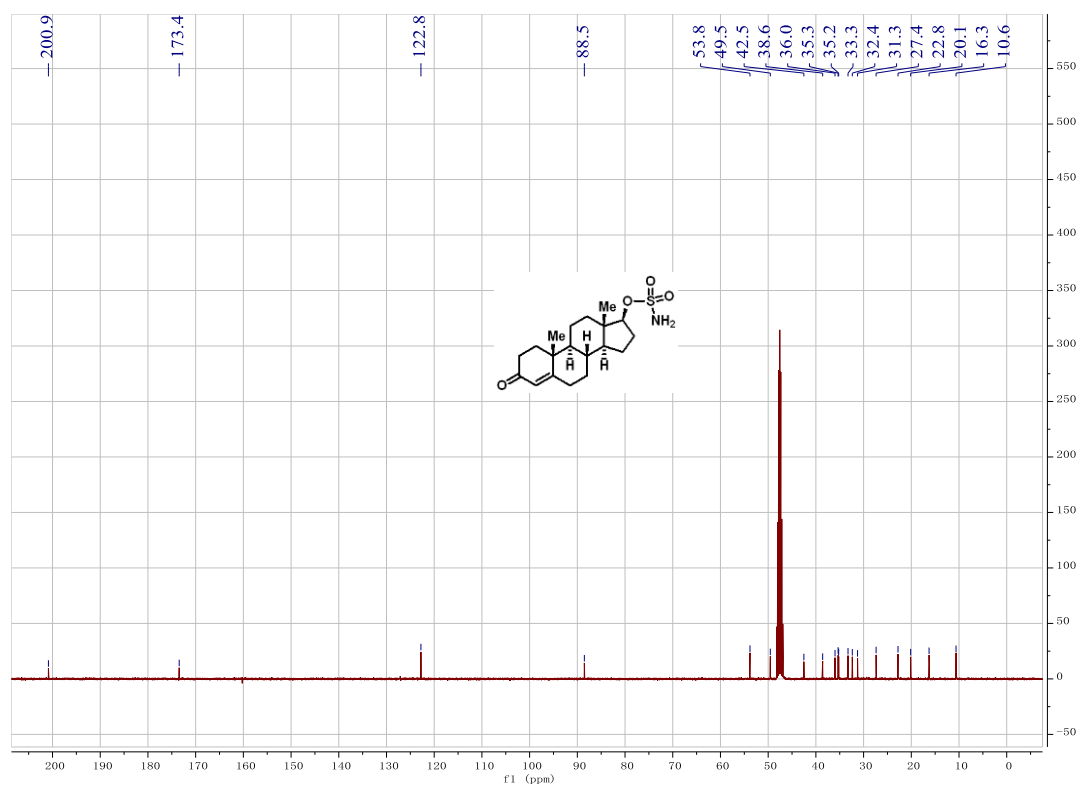

**$^1\text{H}$  (400 MHz, Methanol- $d_4$ ) and  $^{13}\text{C}$  (101 MHz, Methanol- $d_4$ ) spectra of compound 5f**

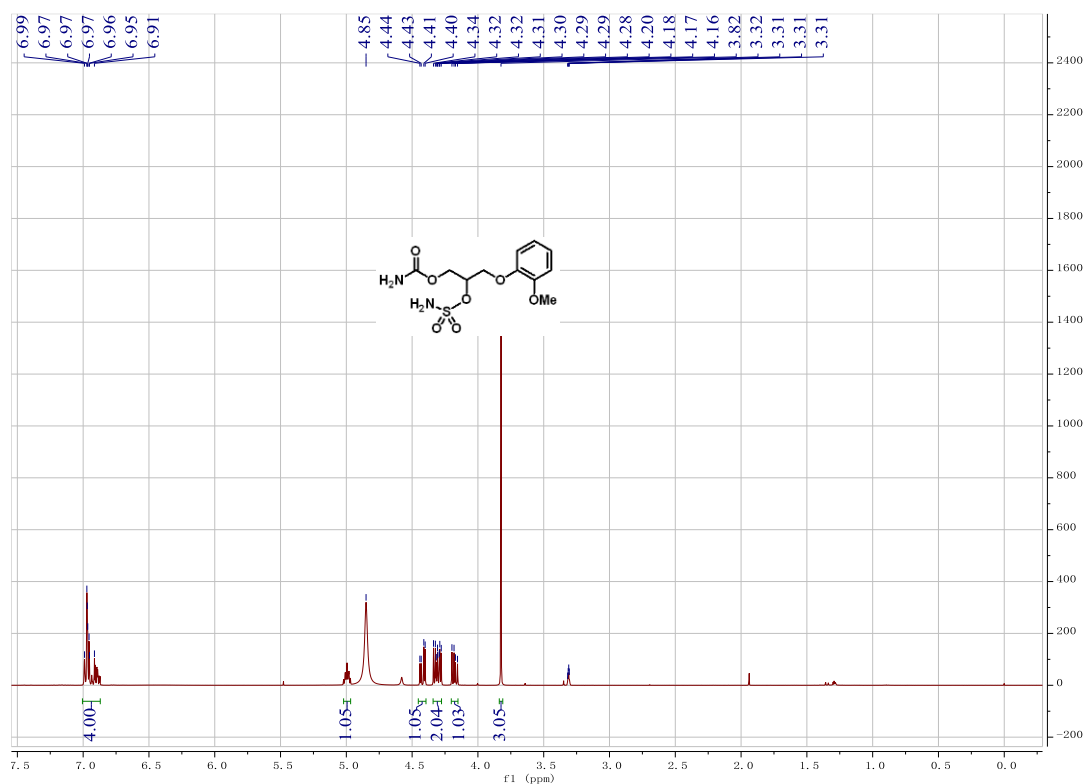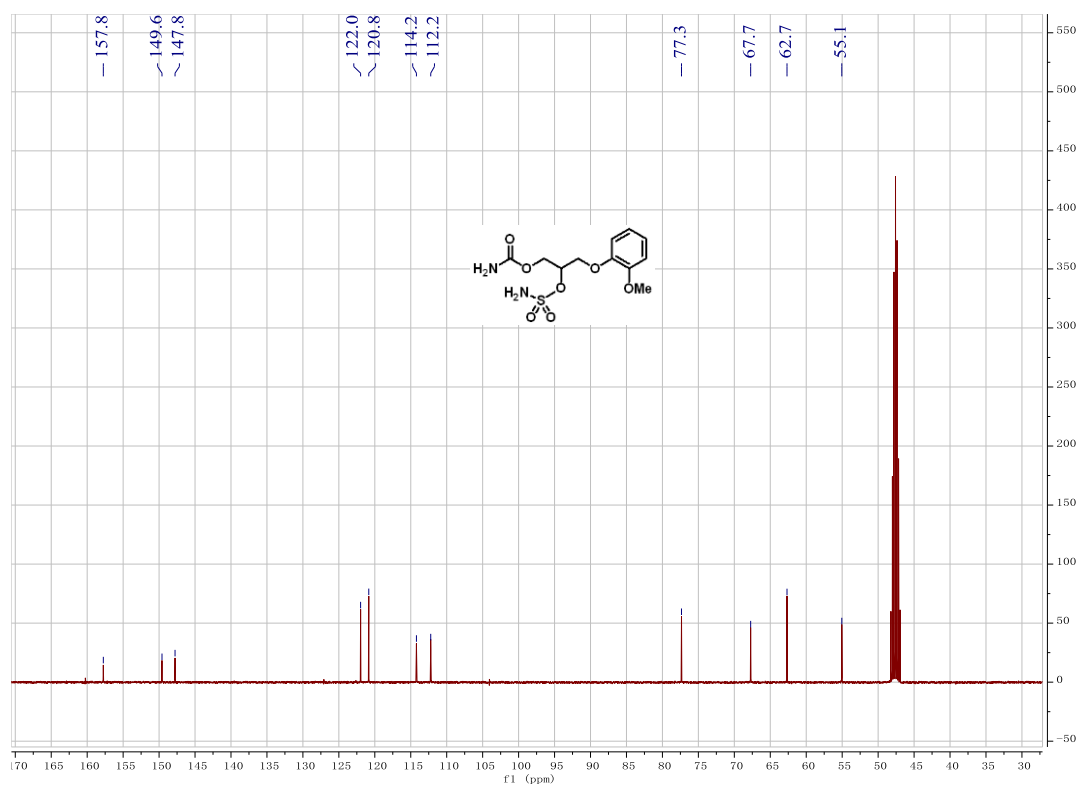

**$^1\text{H}$  (400 MHz, Methanol- $d_4$ ) and  $^{13}\text{C}$  (101 MHz, Methanol- $d_4$ ) spectra of compound 5g**

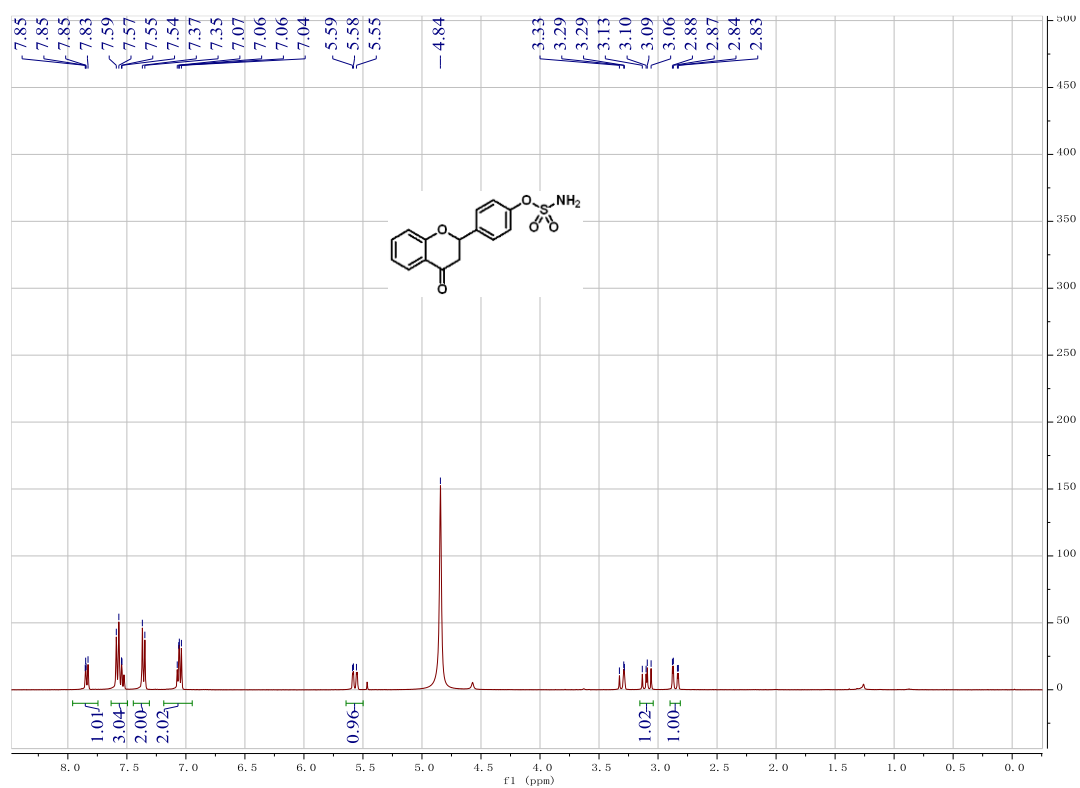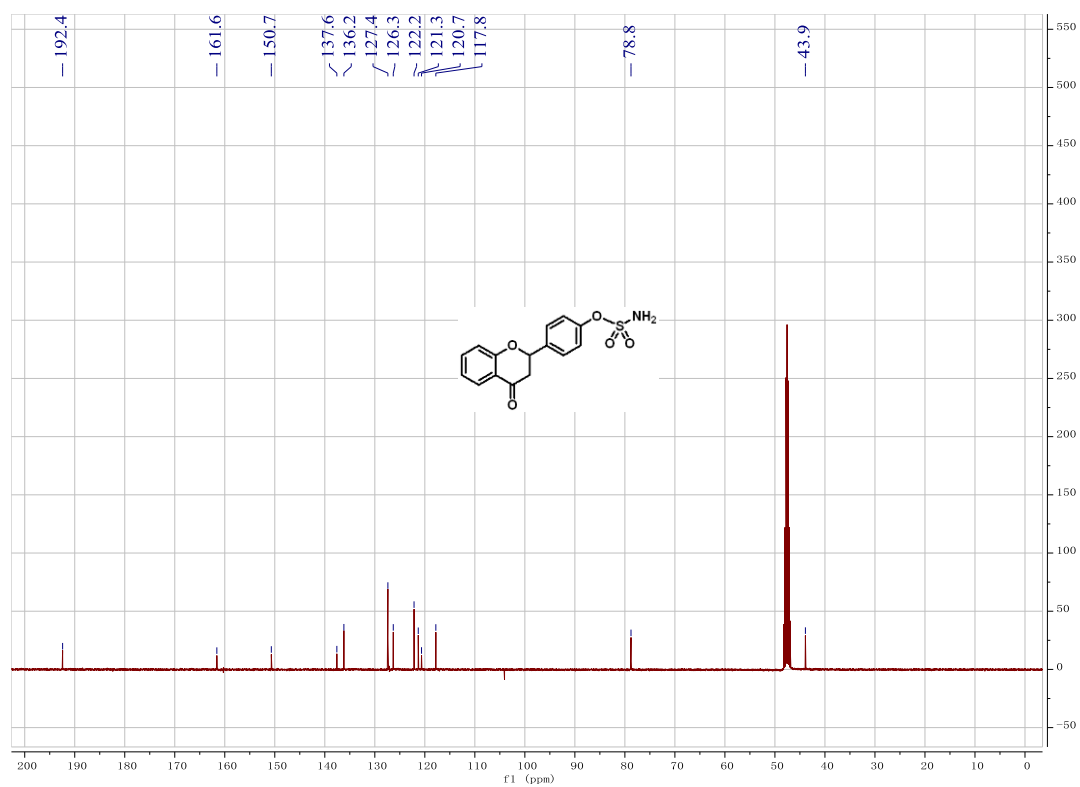

**$^1\text{H}$  (400 MHz, Methanol- $d_4$ ) and  $^{13}\text{C}$  (101 MHz, Methanol- $d_4$ ) spectra of compound 5h**

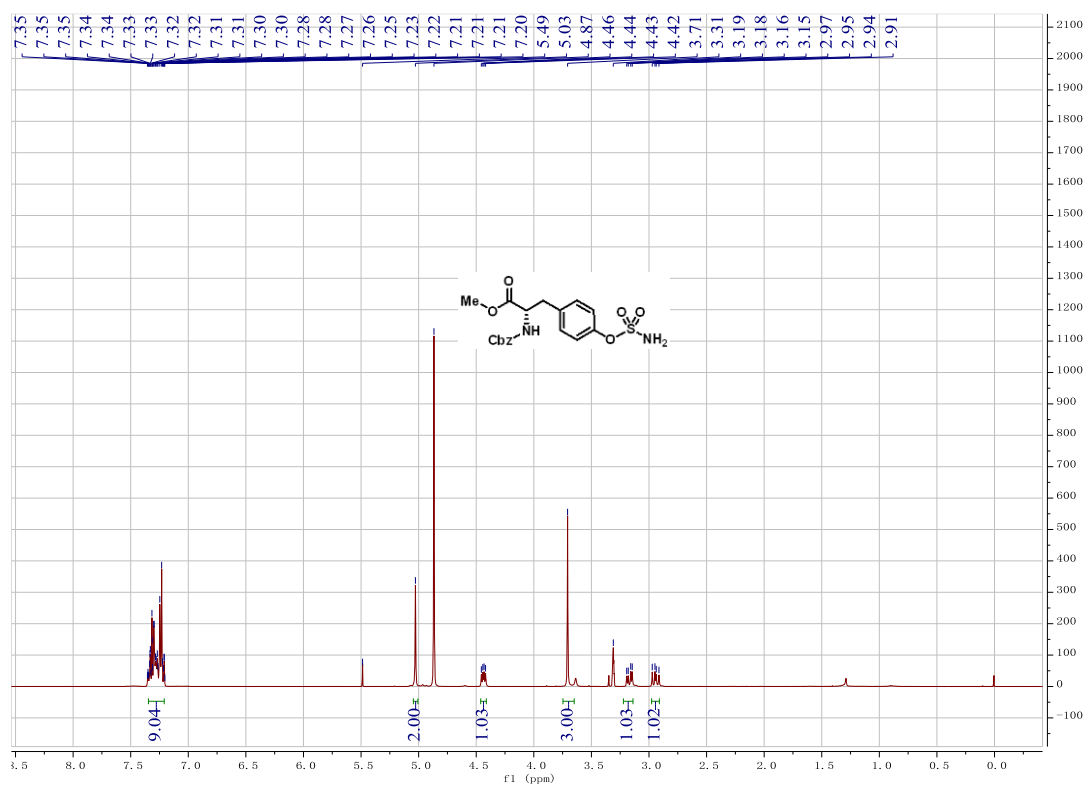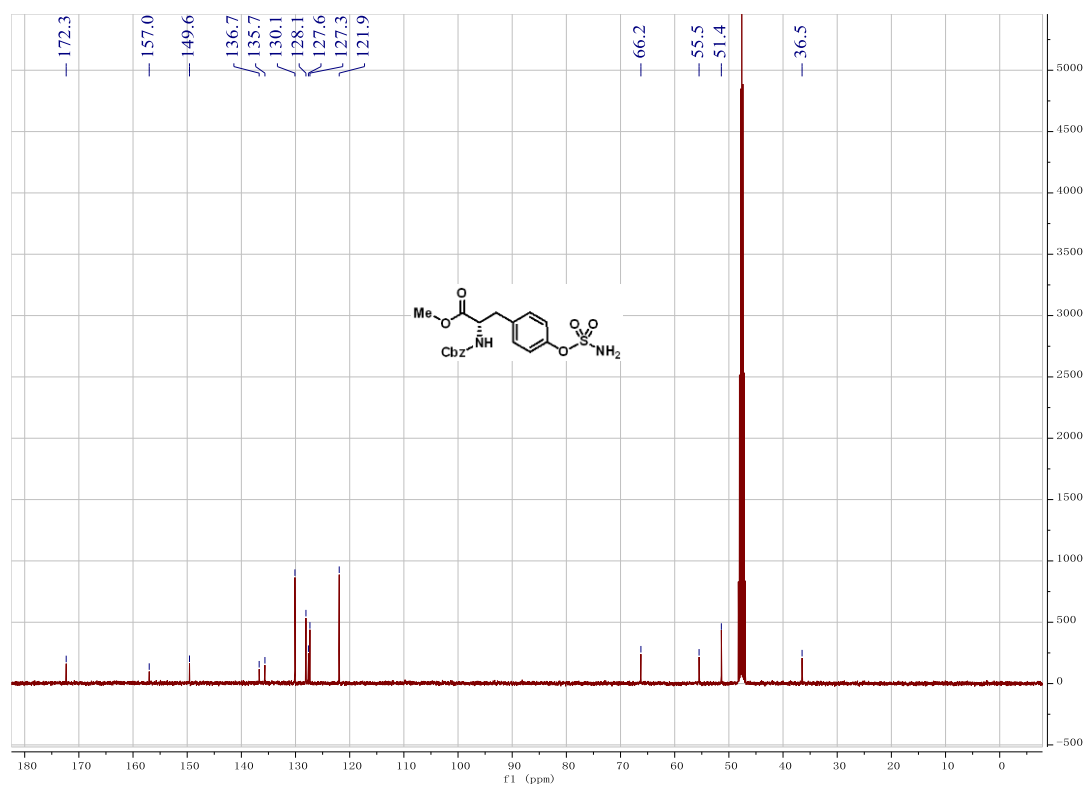

**$^1\text{H}$  (400 MHz, Methanol- $d_4$ ) and  $^{13}\text{C}$  (101 MHz, Methanol- $d_4$ ) spectra of compound 5i**

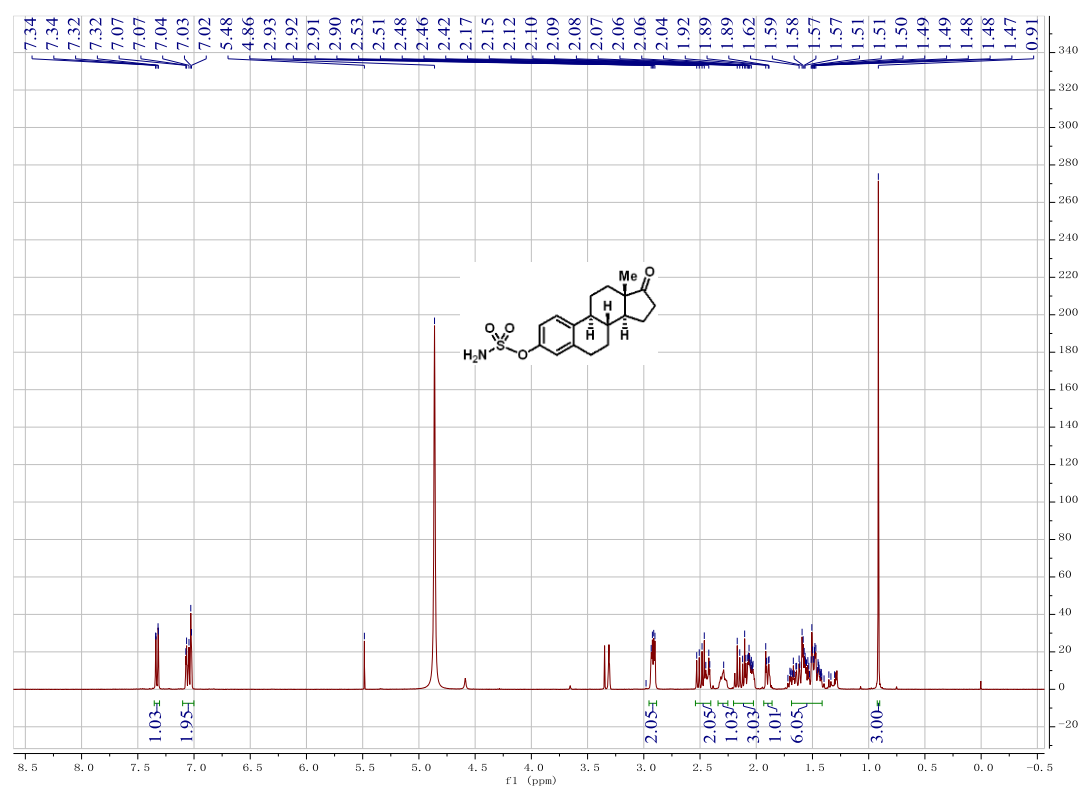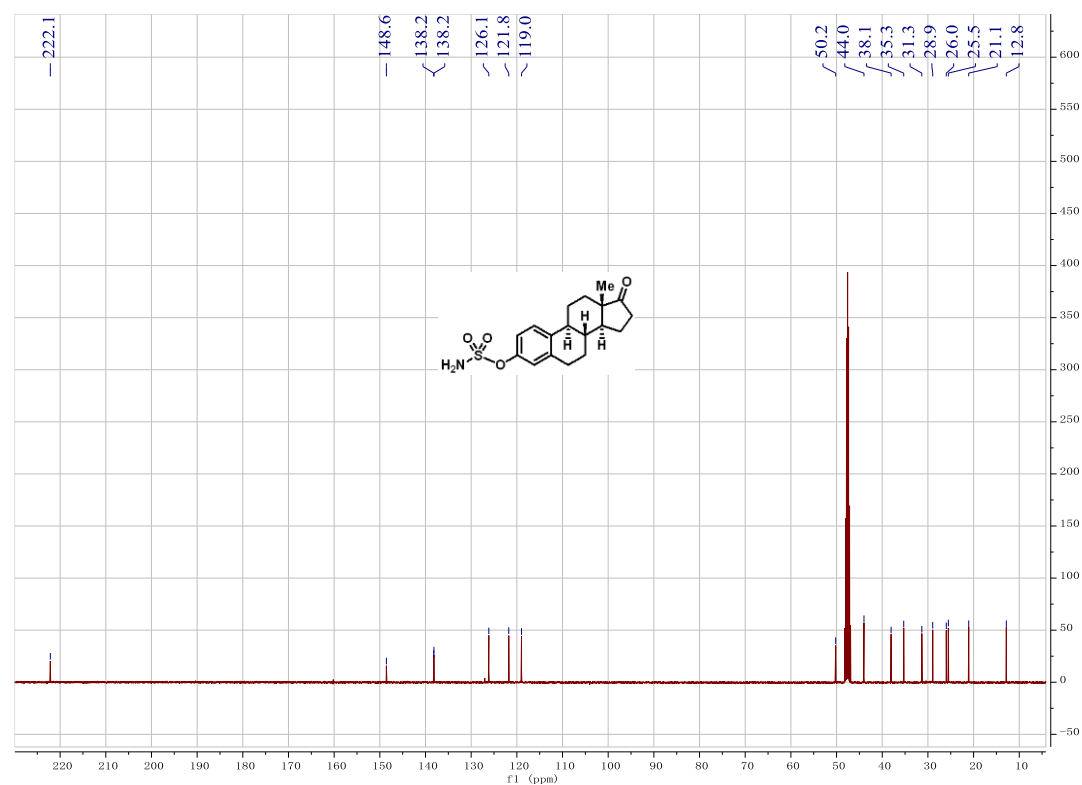

**$^1\text{H}$  (400 MHz, Methanol- $d_4$ ) and  $^{13}\text{C}$  (101 MHz, Methanol- $d_4$ ) spectra of compound 7a**

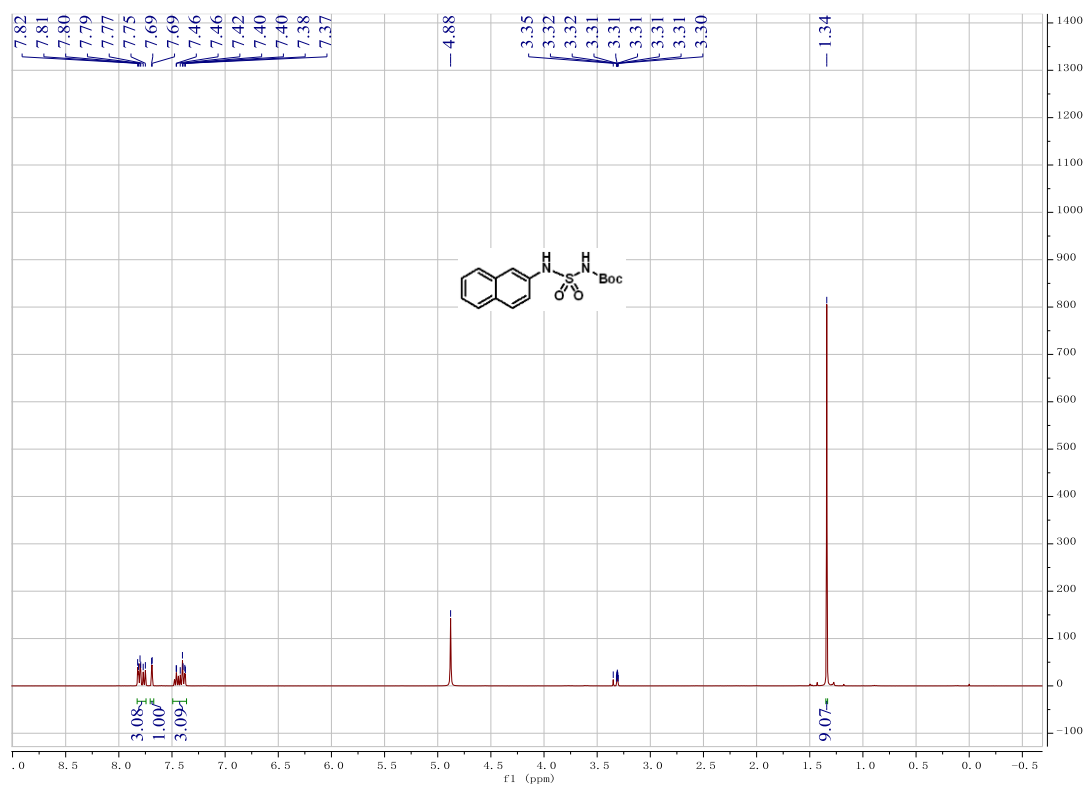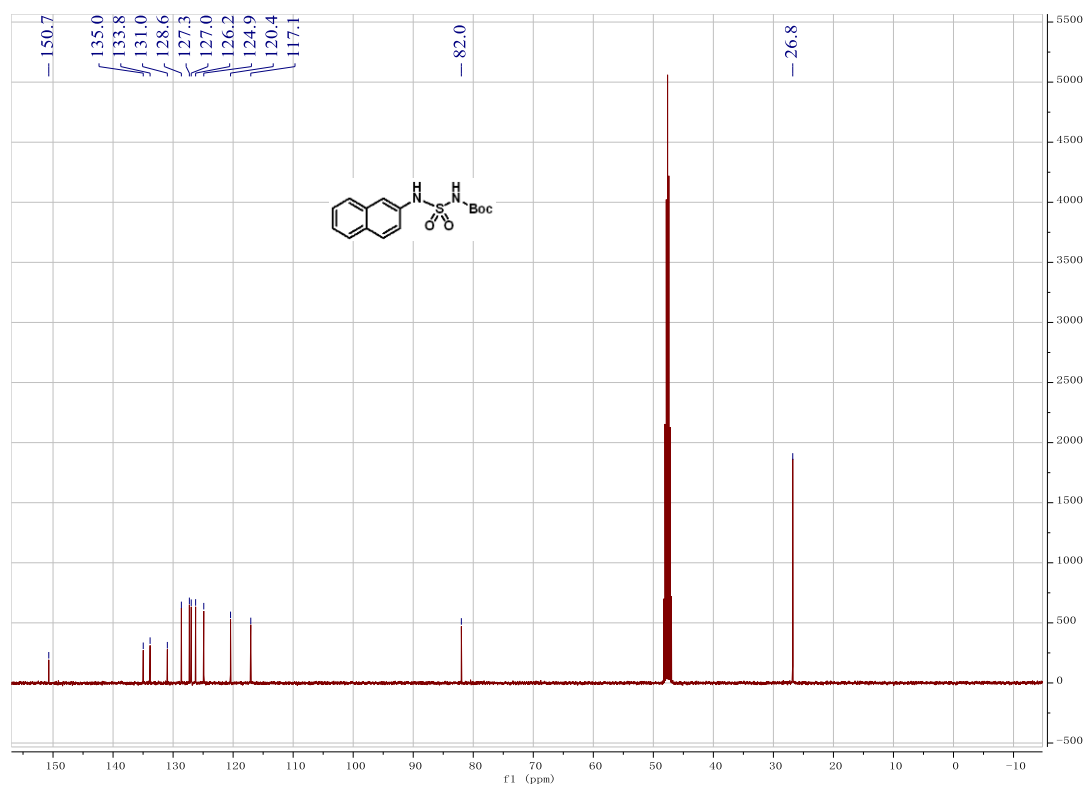

**$^1\text{H}$  (400 MHz, Methanol- $d_4$ ) and  $^{13}\text{C}$  (101 MHz, Methanol- $d_4$ ) spectra of compound 7b**

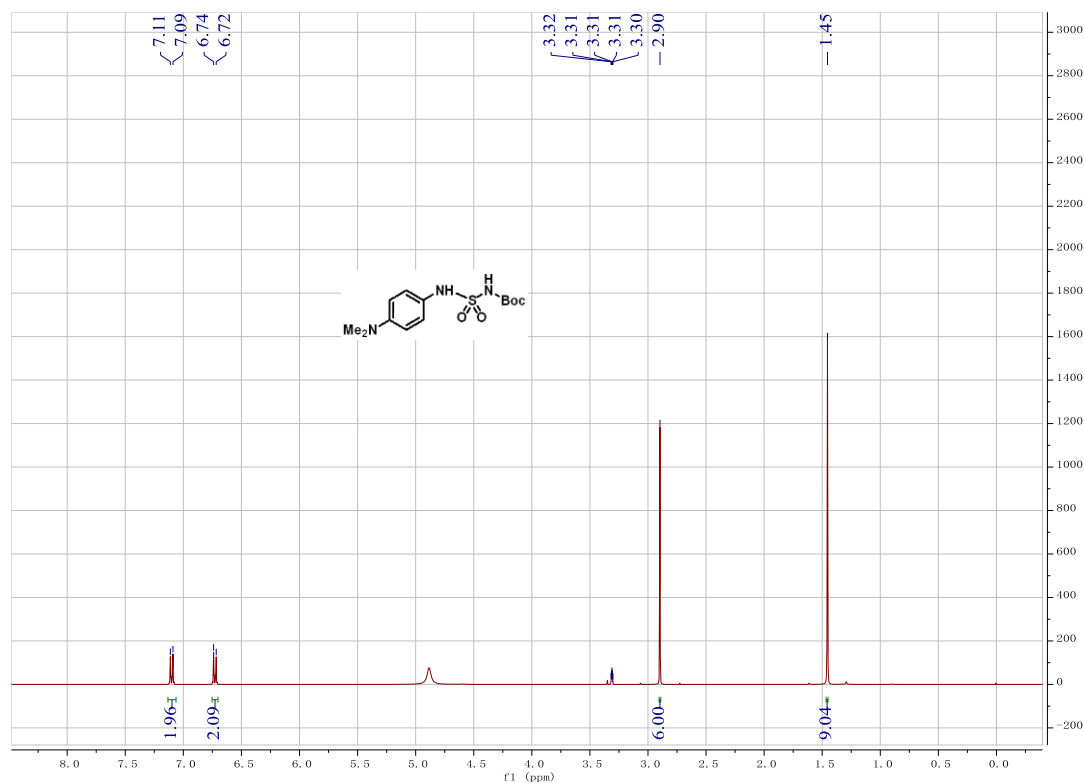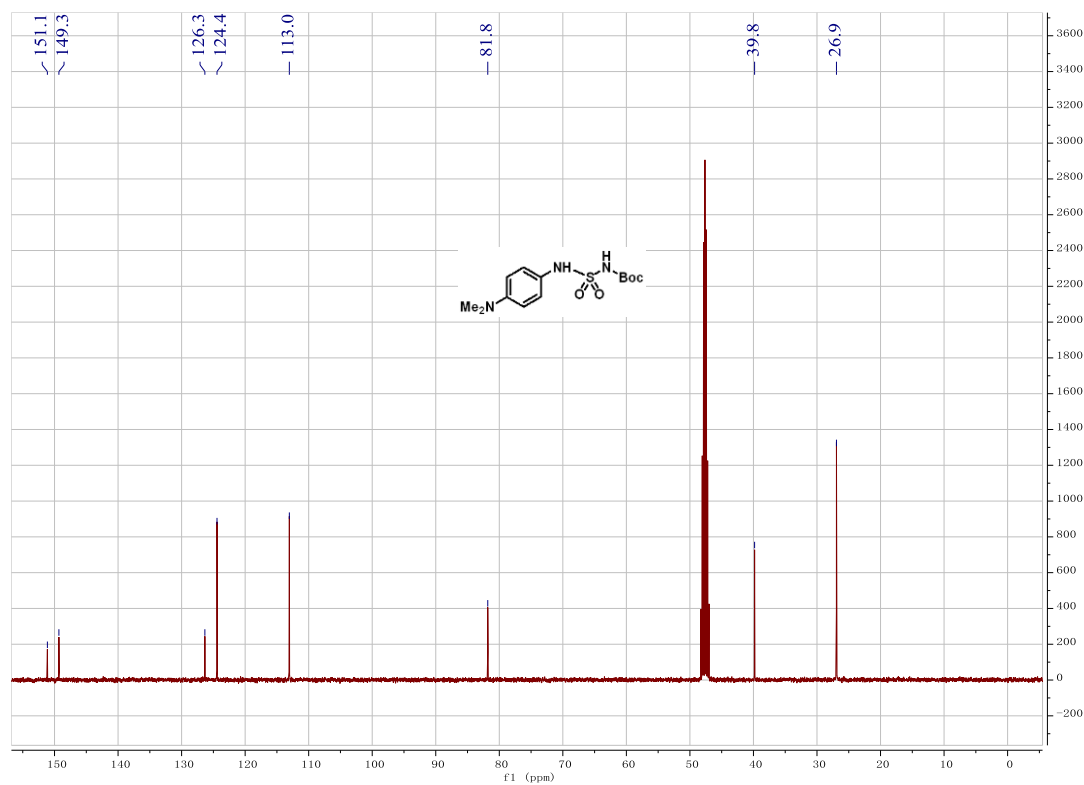

**$^1\text{H}$  (400 MHz, Methanol- $d_4$ ) and  $^{13}\text{C}$  (101 MHz, Methanol- $d_4$ ) spectra of compound 7c**

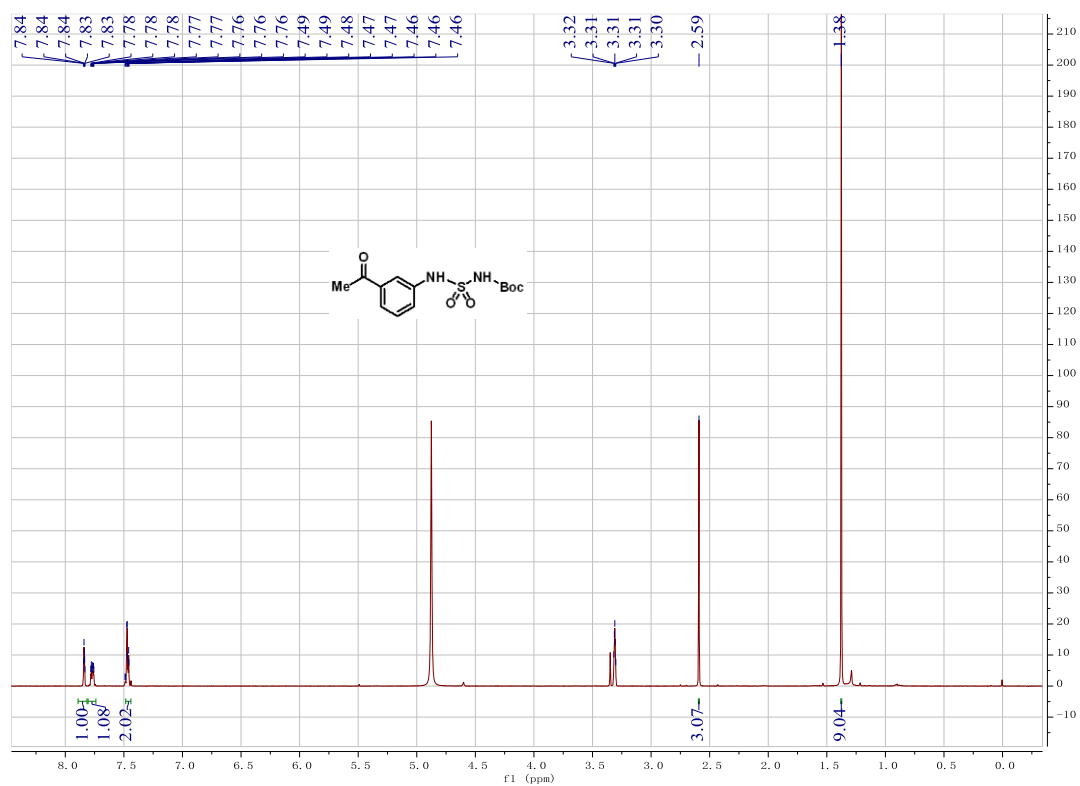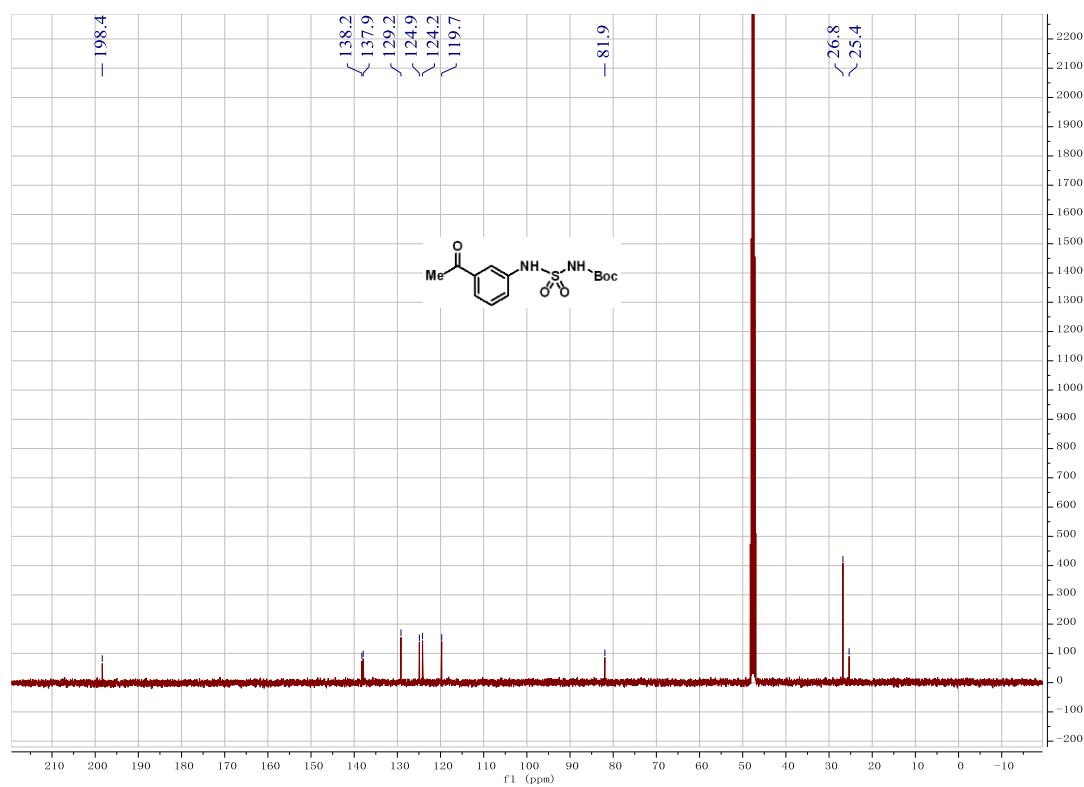



**$^1\text{H}$  (400 MHz, Methanol- $d_4$ ) and  $^{13}\text{C}$  (101 MHz, Methanol- $d_4$ ) spectra of compound 7d**

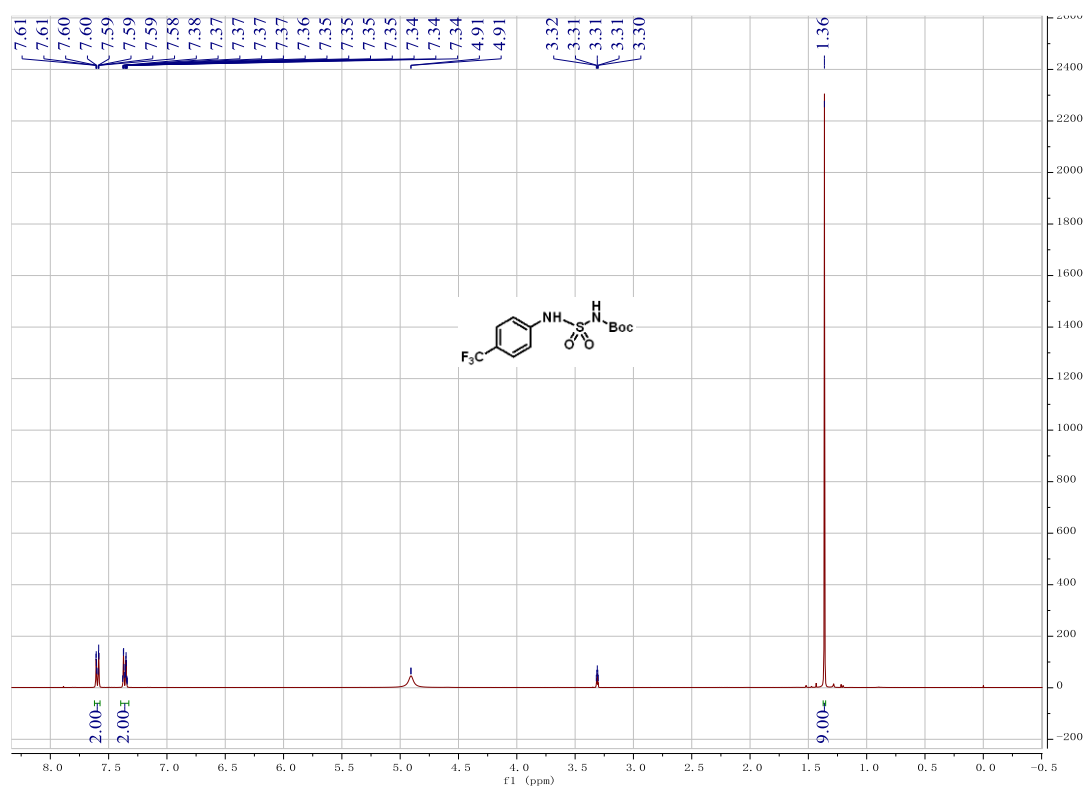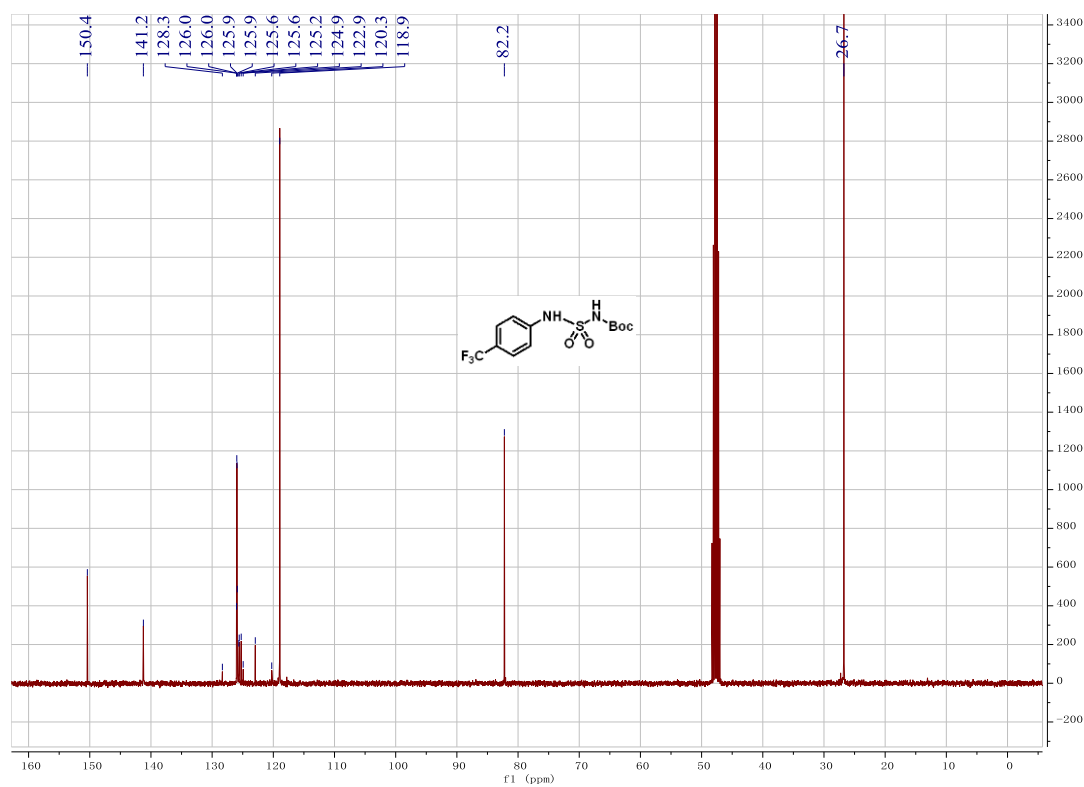

**$^1\text{H}$  (400 MHz, Methanol- $d_4$ ) and  $^{13}\text{C}$  (101 MHz, Methanol- $d_4$ ) spectra of compound 7e**

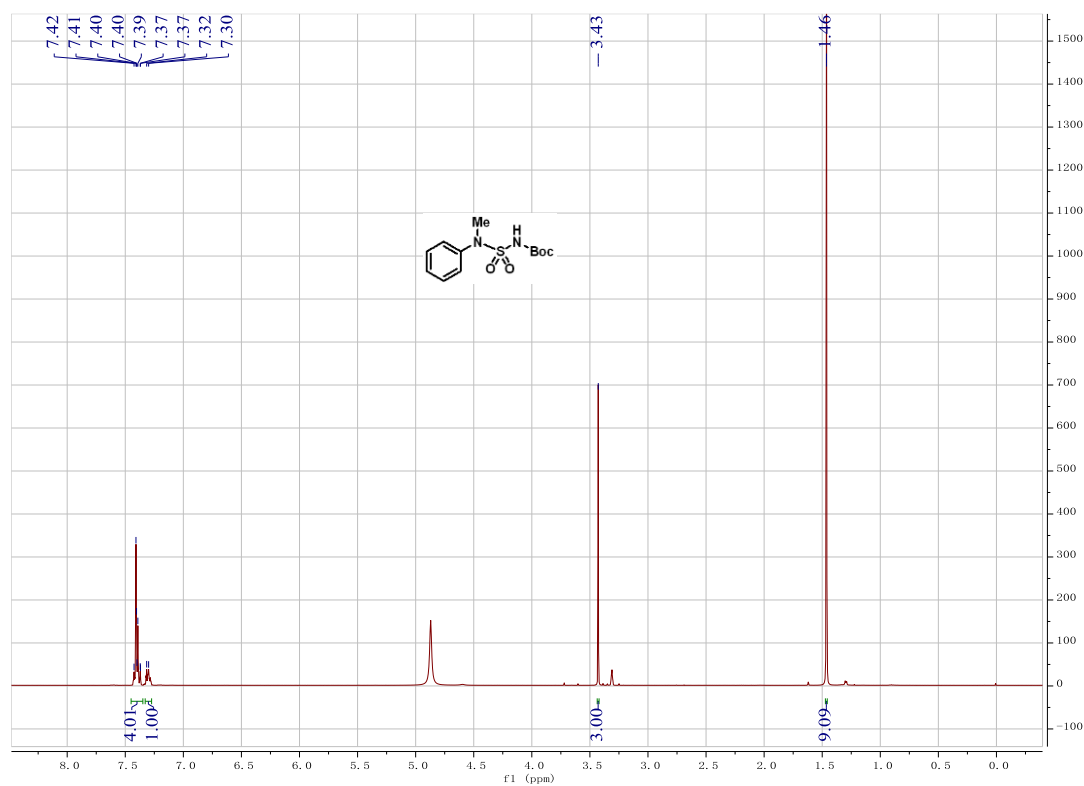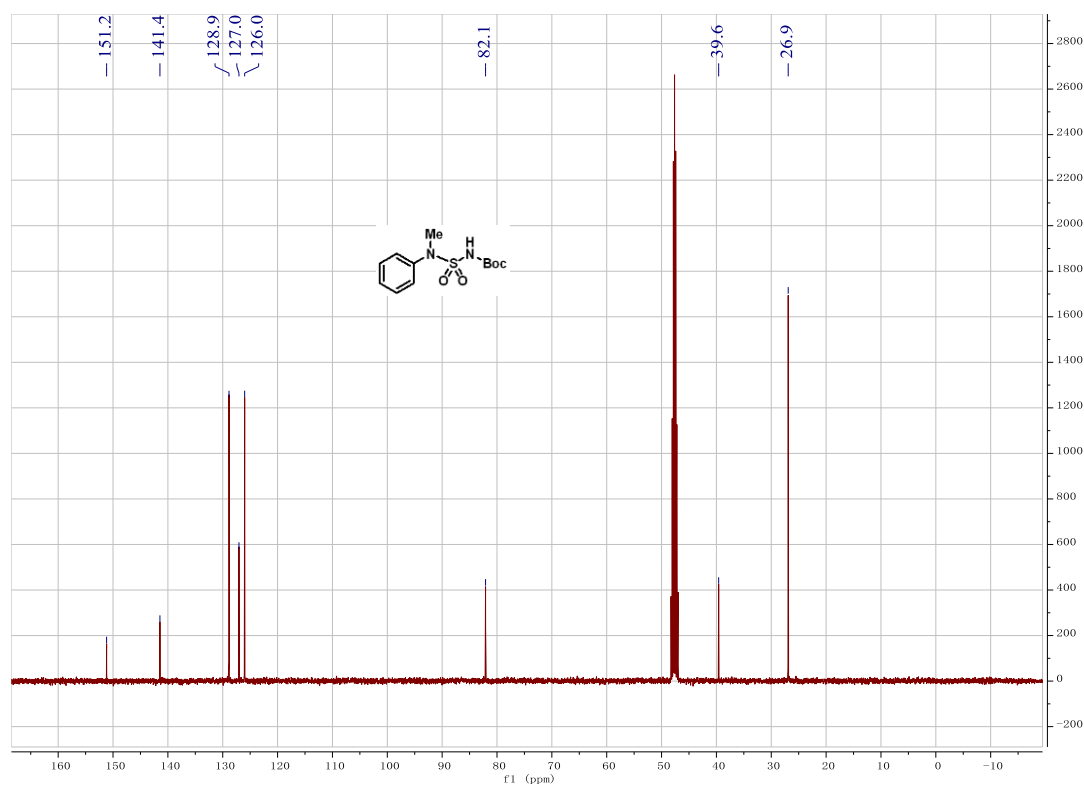

**$^1\text{H}$  (400 MHz, Methanol- $d_4$ ) and  $^{13}\text{C}$  (101 MHz, Methanol- $d_4$ ) spectra of compound 7f**

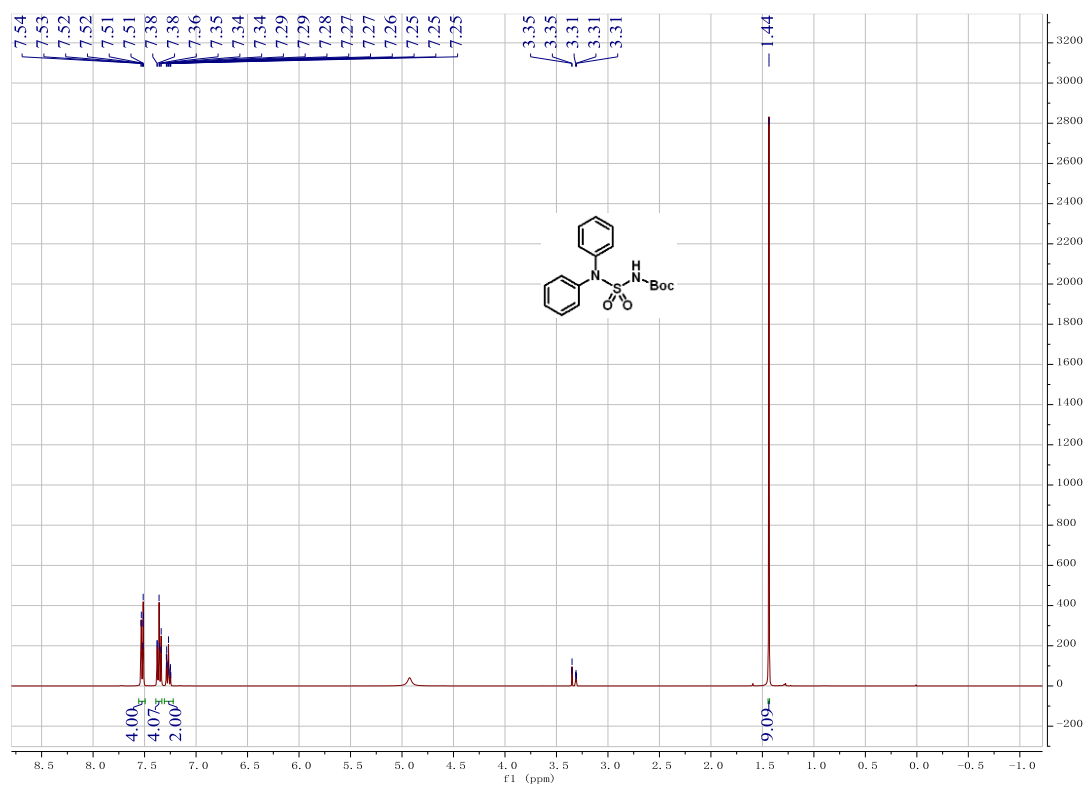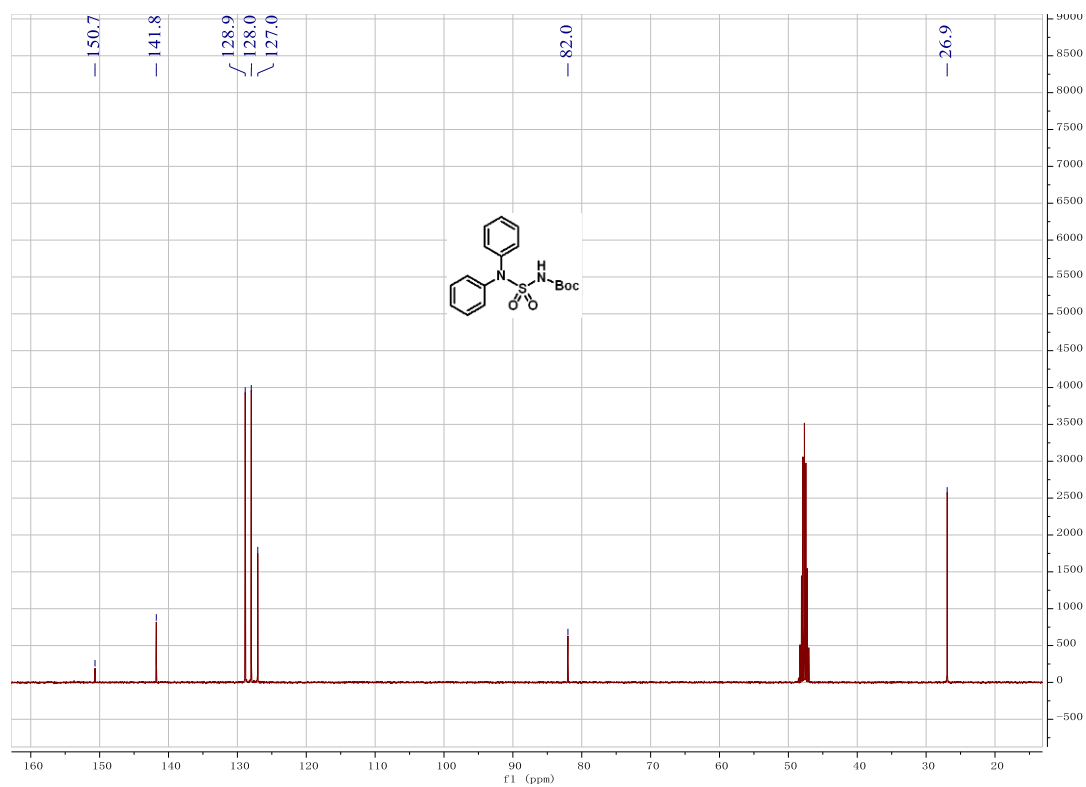

**$^1\text{H}$  (400 MHz, Methanol- $d_4$ ) and  $^{13}\text{C}$  (101 MHz, Methanol- $d_4$ ) spectra of compound 7g**

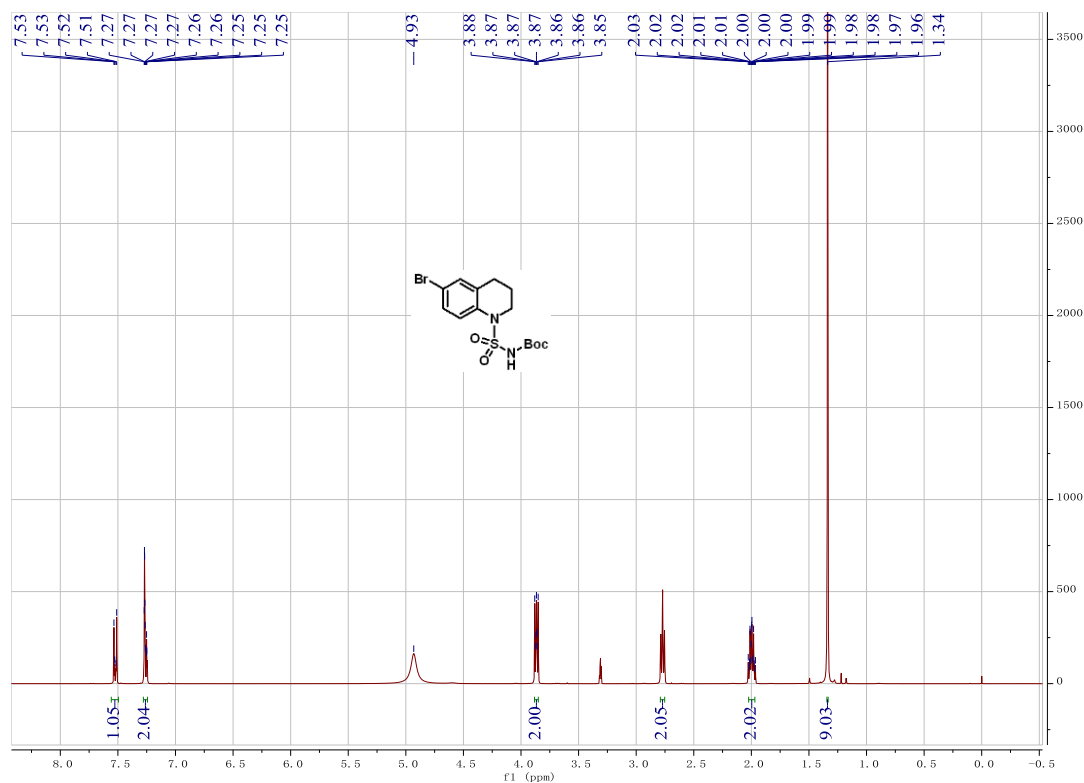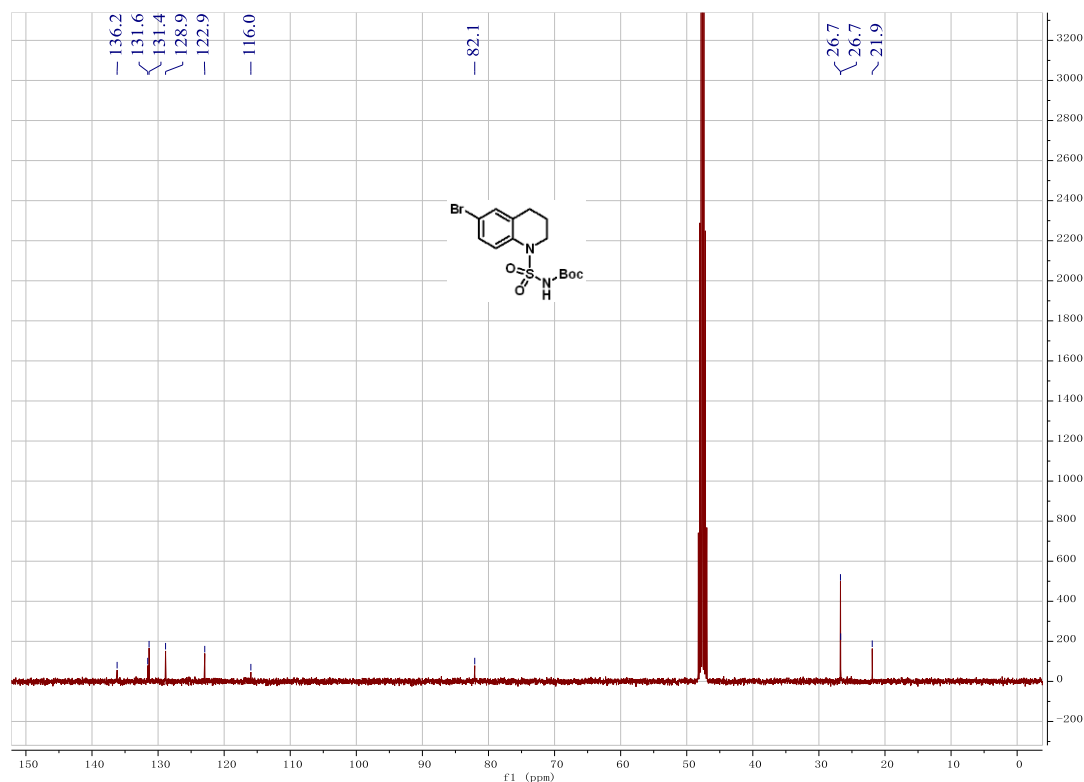

**$^1\text{H}$  (400 MHz, Chloroform-*d*) and  $^{13}\text{C}$  (101 MHz, Chloroform-*d*) spectra of compound 7h**

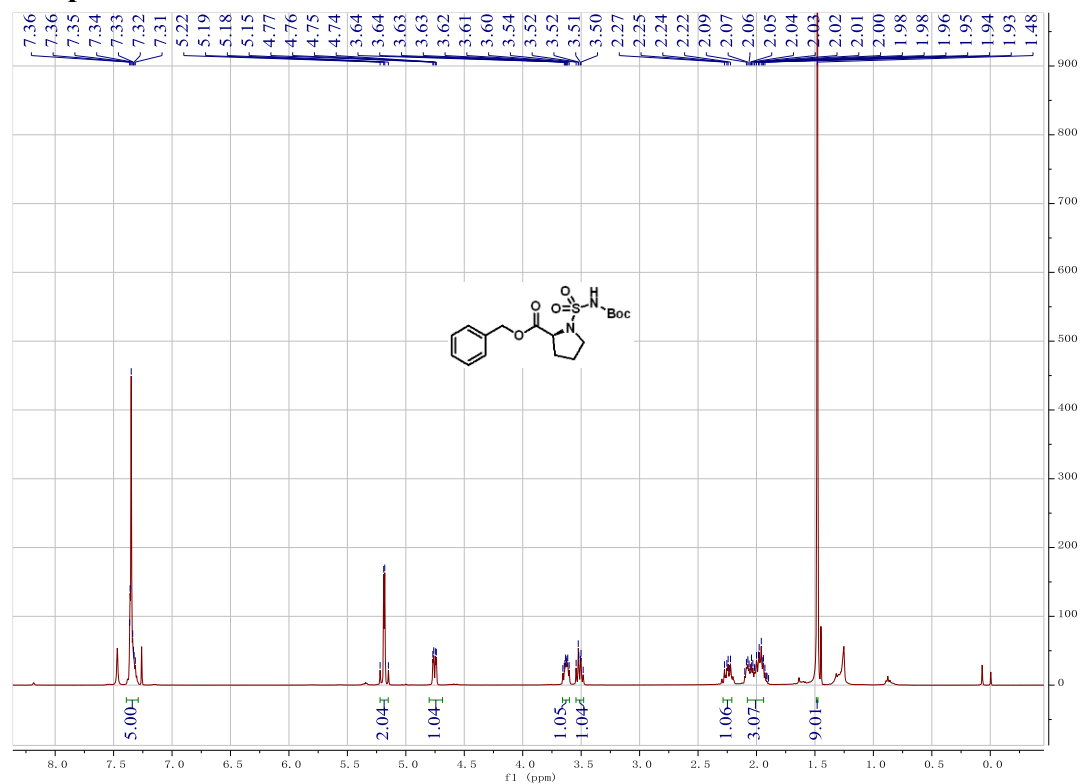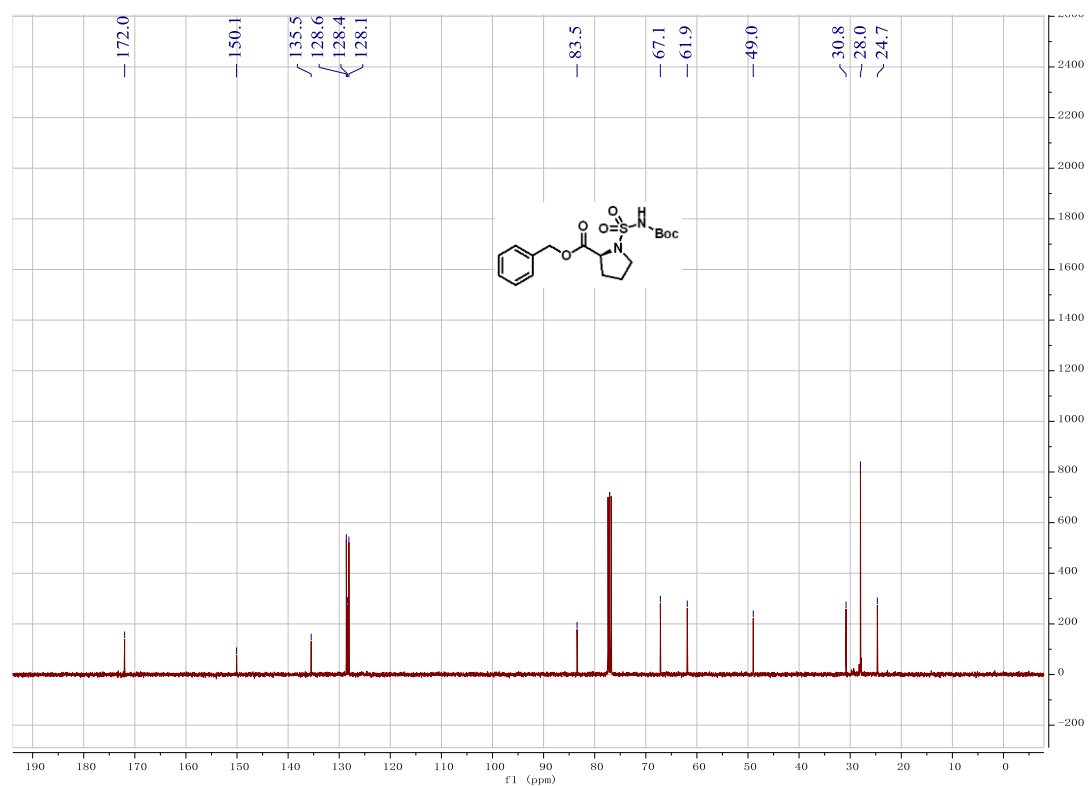

**$^1\text{H}$  (400 MHz, Methanol- $d_4$ ) and  $^{13}\text{C}$  (101 MHz, Methanol- $d_4$ ) spectra of compound 7i**

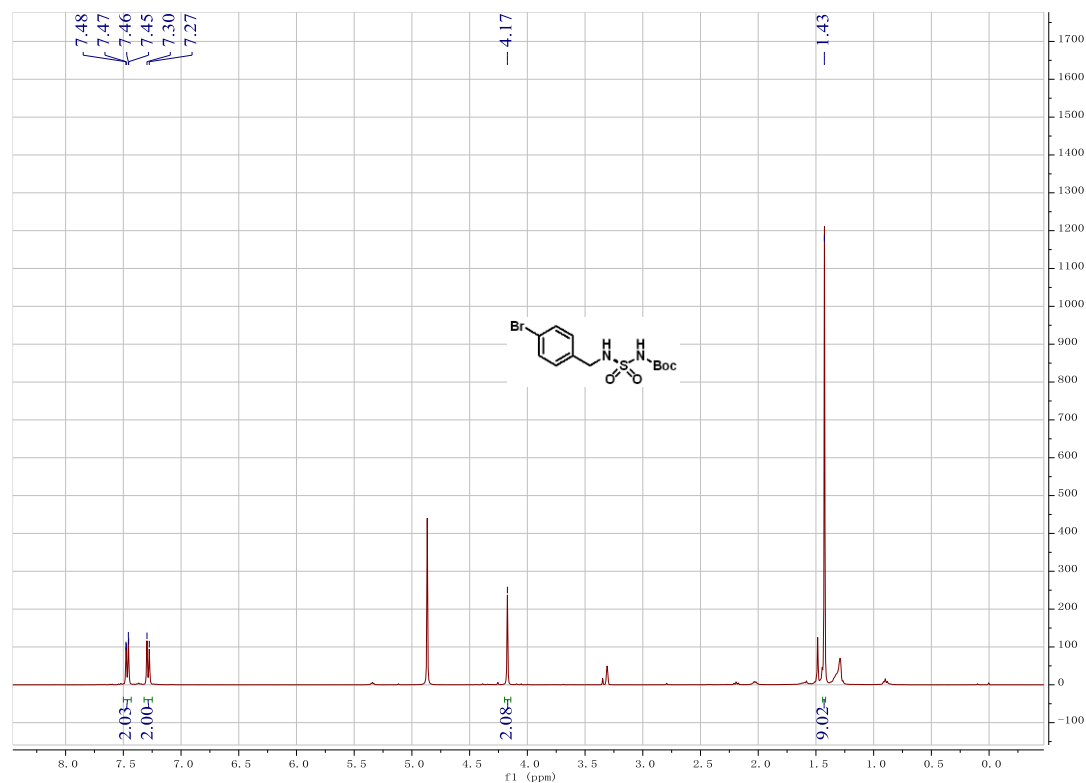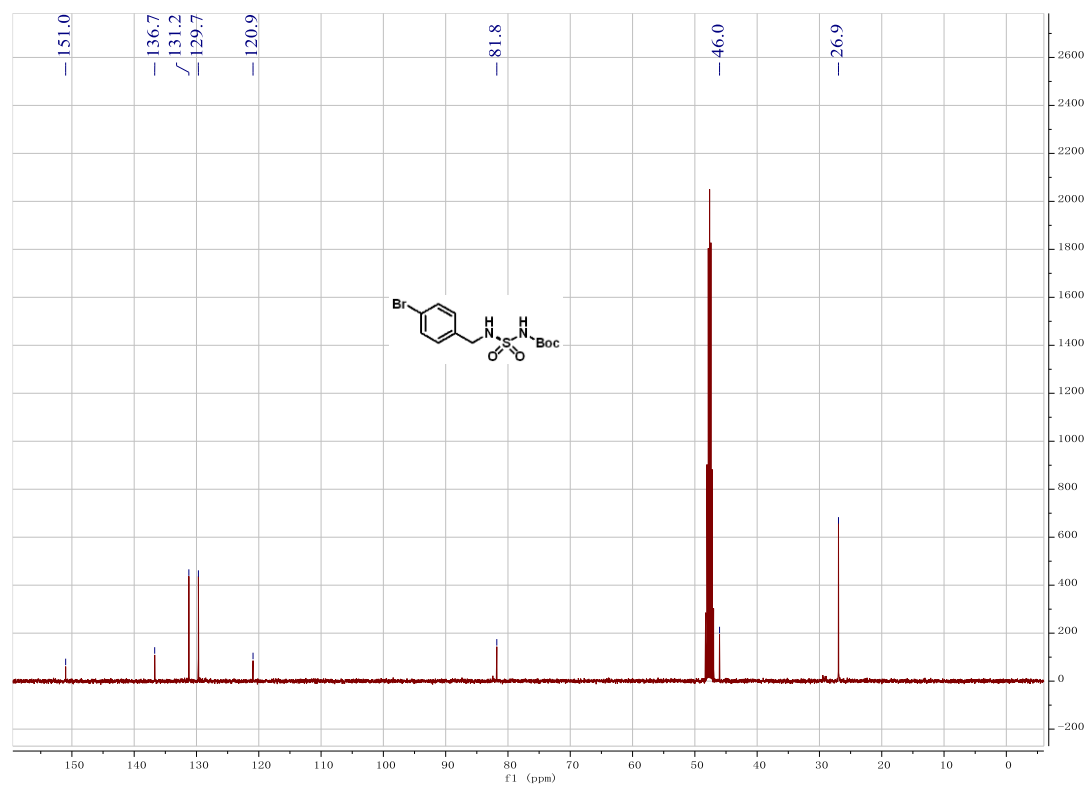

**$^1\text{H}$  (400 MHz, Methanol- $d_4$ ) and  $^{13}\text{C}$  (101 MHz, Methanol- $d_4$ ) spectra of compound 7j**

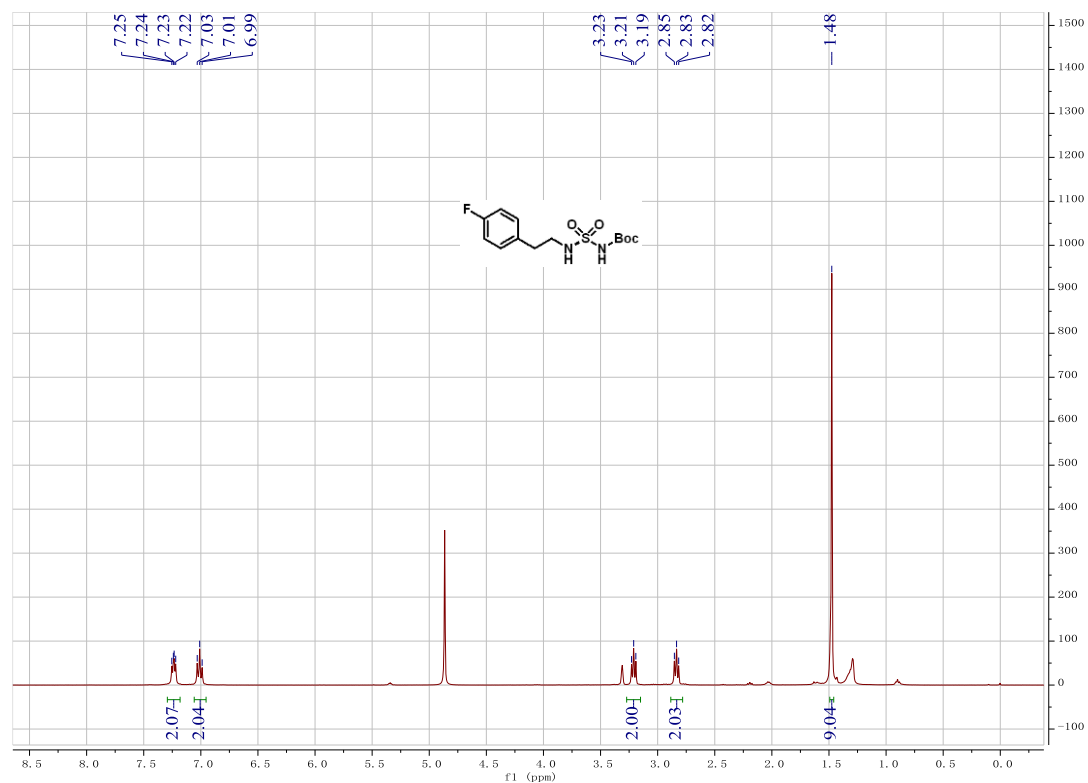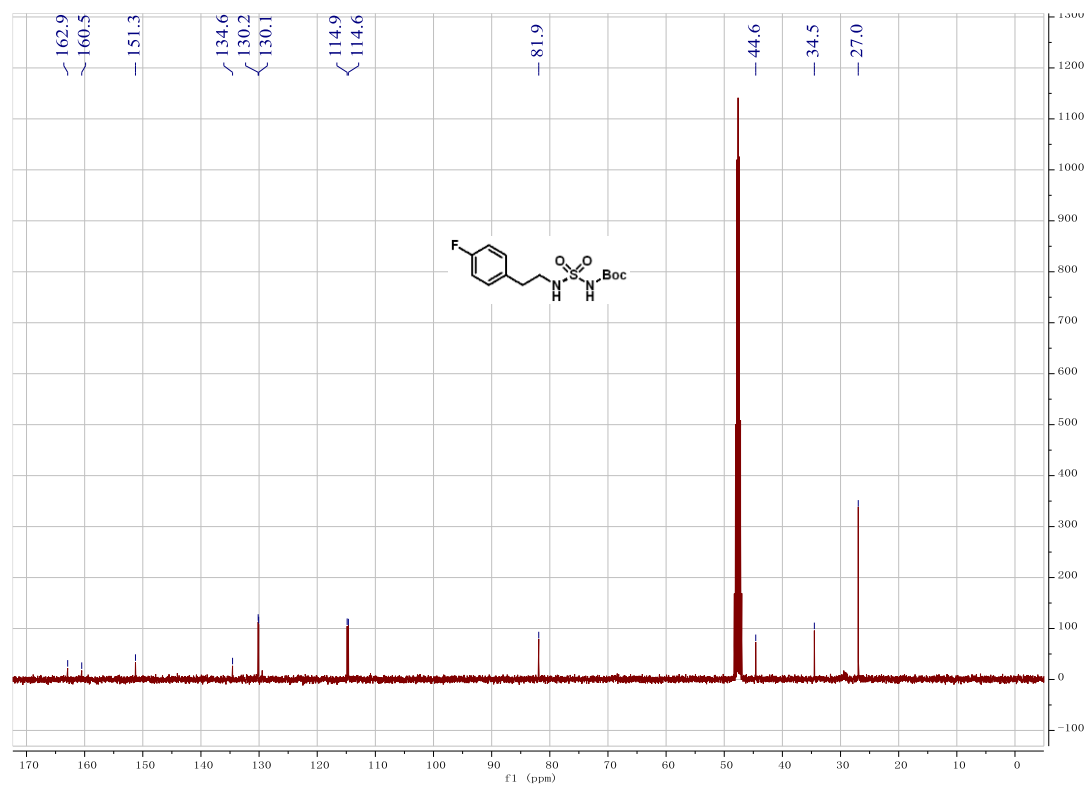

**$^1\text{H}$  (400 MHz, Methanol- $d_4$ ) and  $^{13}\text{C}$  (101 MHz, Methanol- $d_4$ ) spectra of compound 9a**

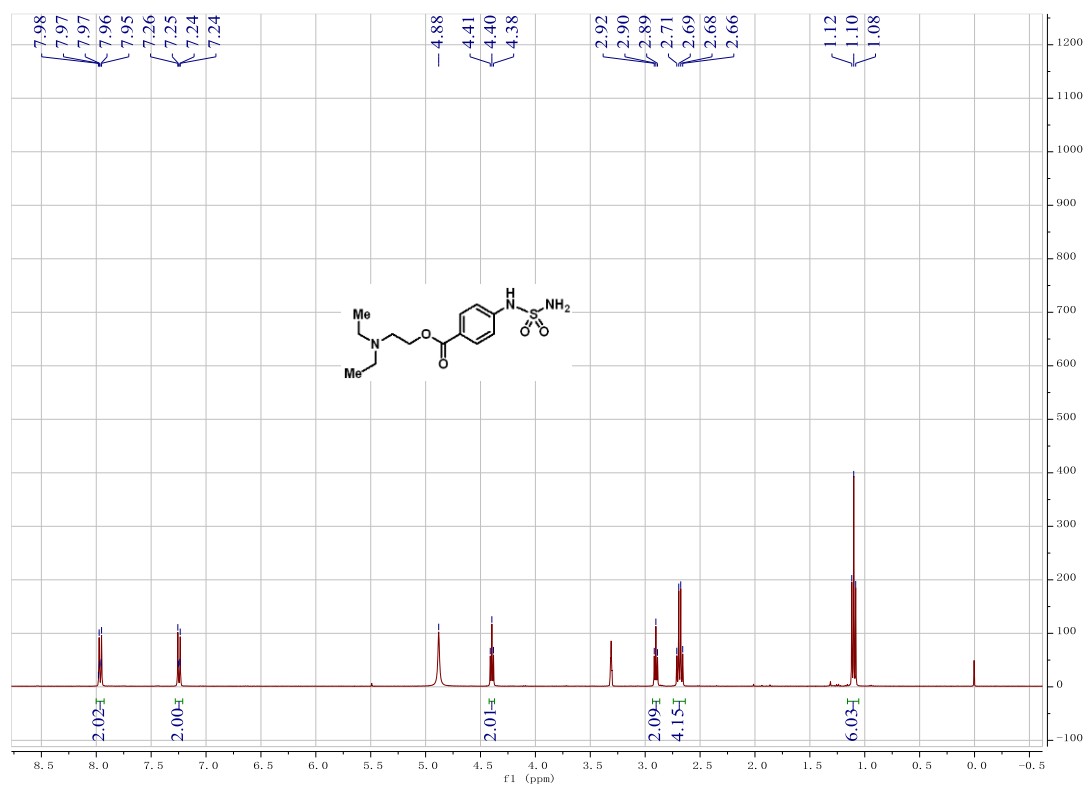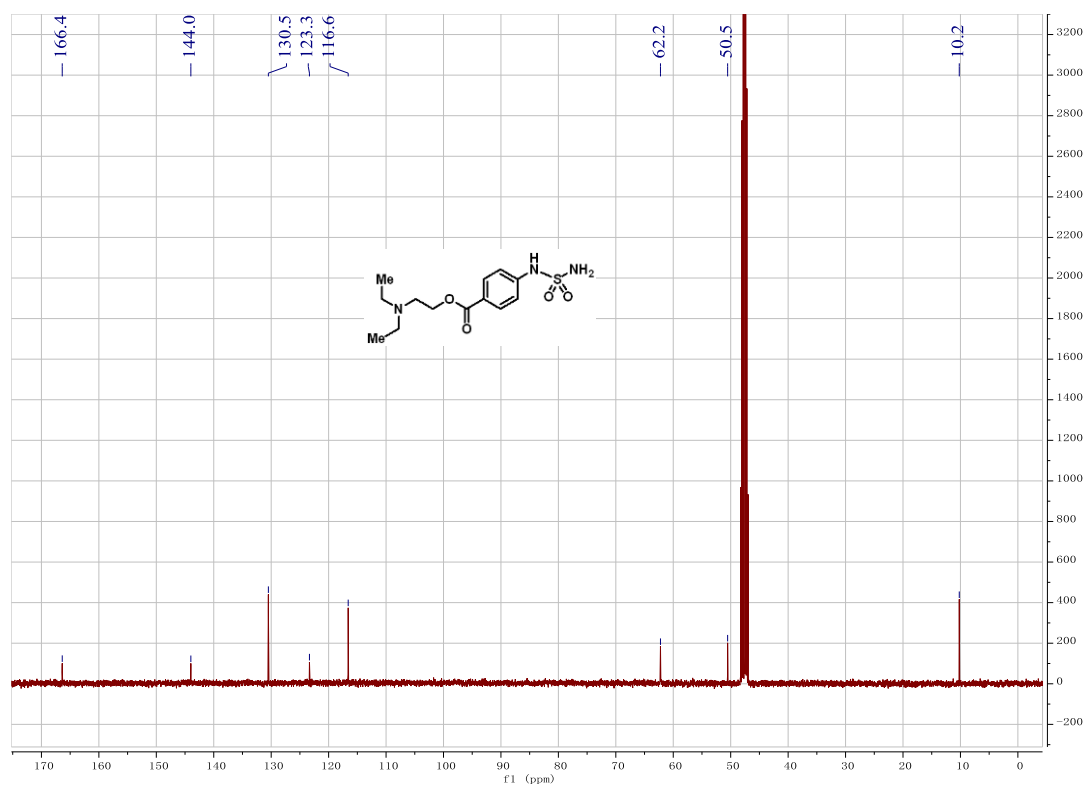



**$^1\text{H}$  (400 MHz, Methanol- $d_4$ ) and  $^{13}\text{C}$  (101 MHz, Methanol- $d_4$ ) spectra of compound 9b**

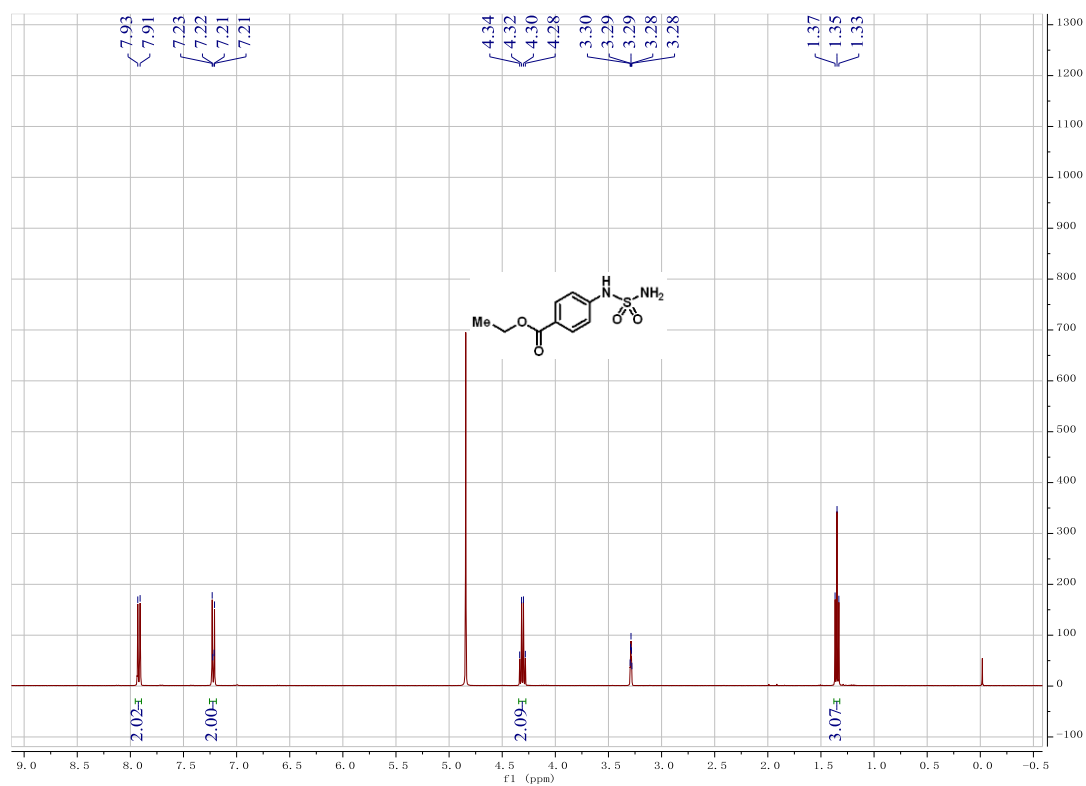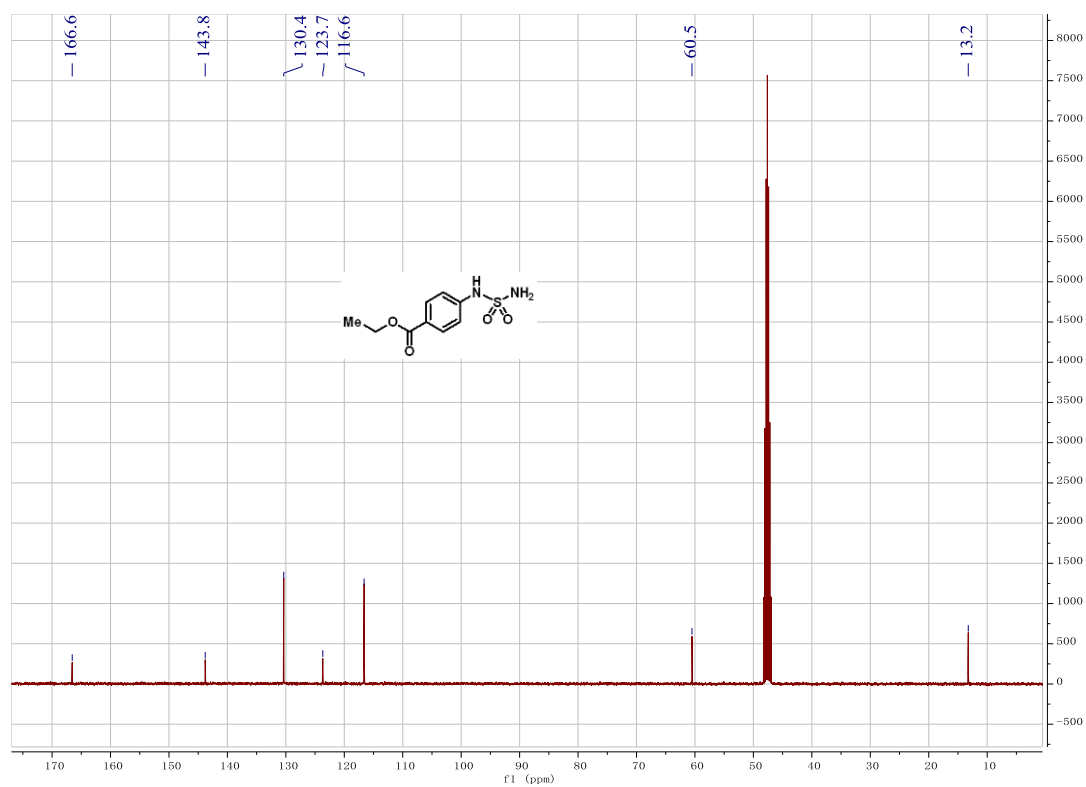

**$^1\text{H}$  (400 MHz, Methanol- $d_4$ ) and  $^{13}\text{C}$  (101 MHz, Methanol- $d_4$ ) spectra of compound 9c**

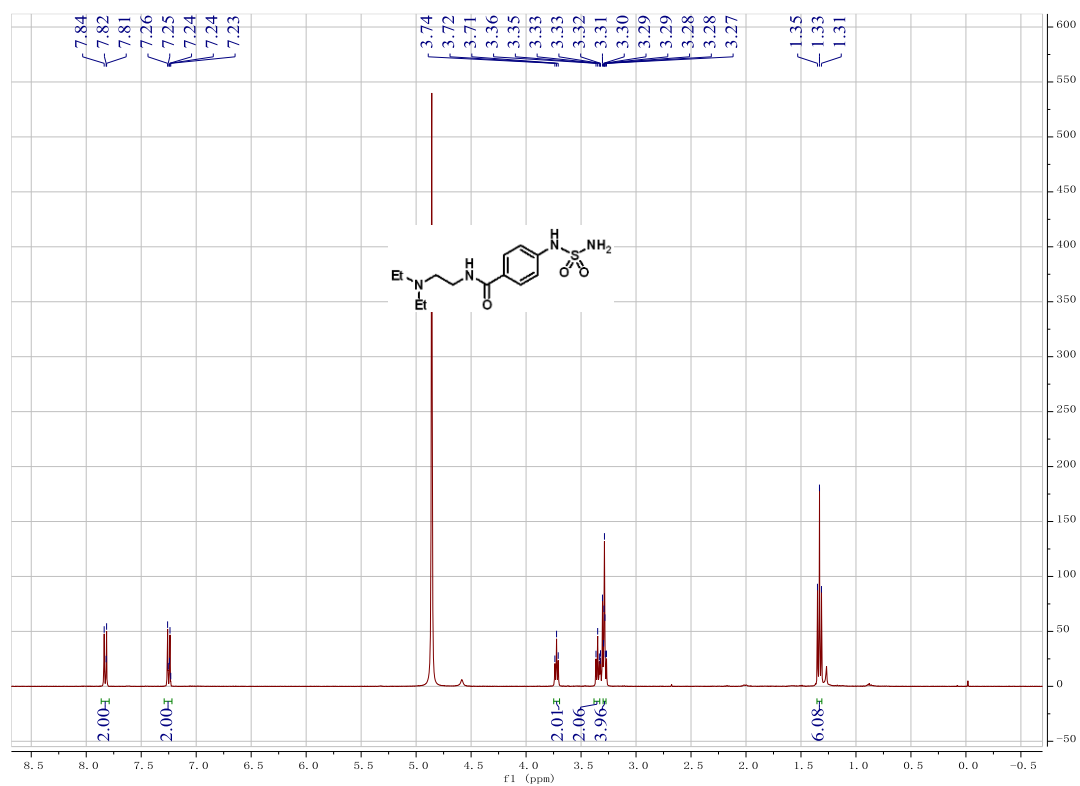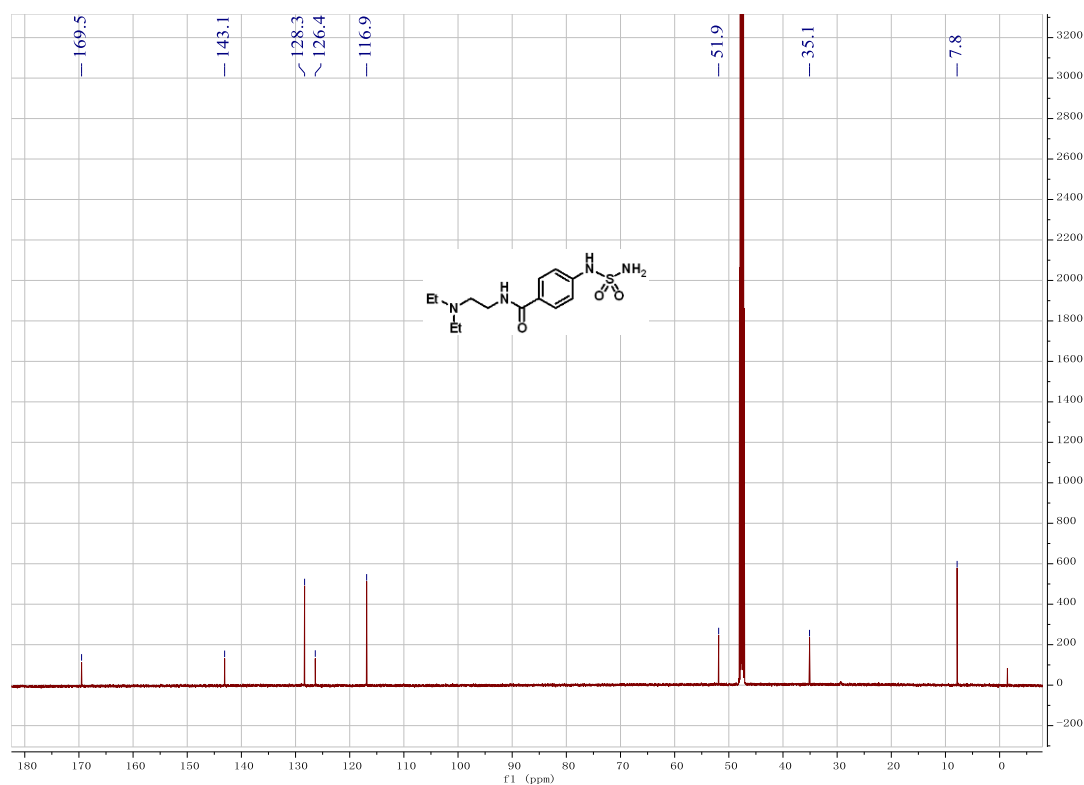

**$^1\text{H}$  (400 MHz, Methanol- $d_4$ ) and  $^{13}\text{C}$  (101 MHz, Methanol- $d_4$ ) spectra of compound 9d**

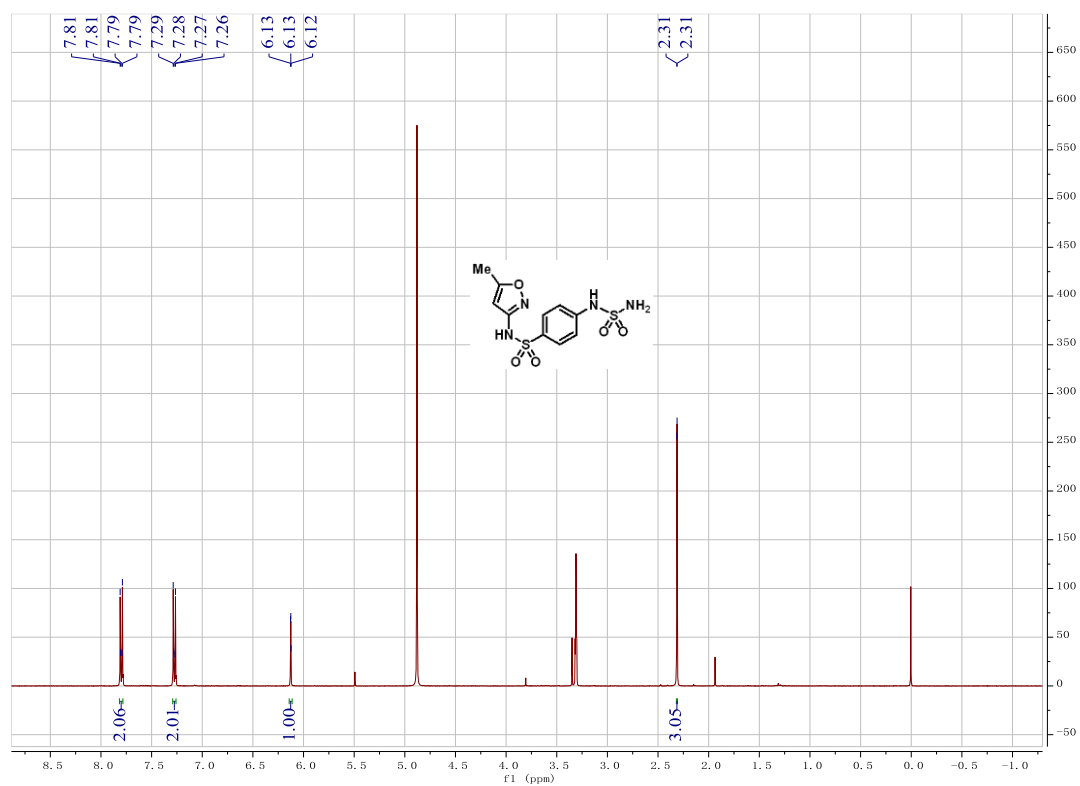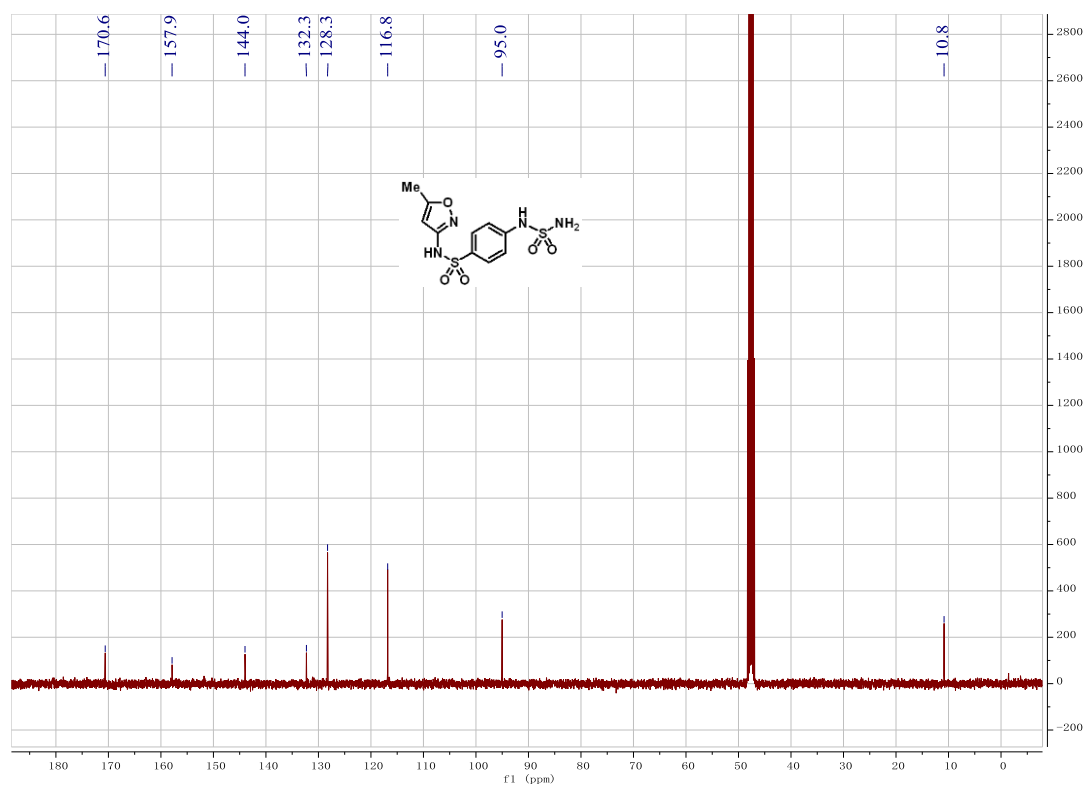

**$^1\text{H}$  (400 MHz, Methanol- $d_4$ ) and  $^{13}\text{C}$  (101 MHz, Methanol- $d_4$ ) spectra of compound 9e**

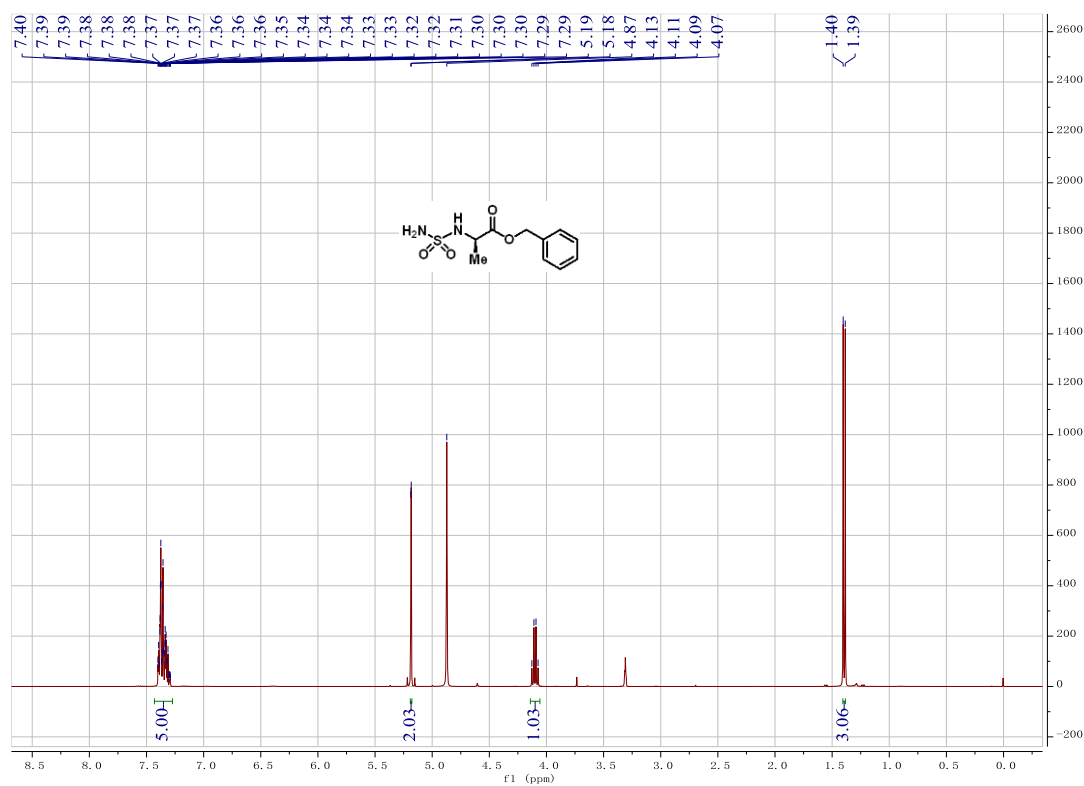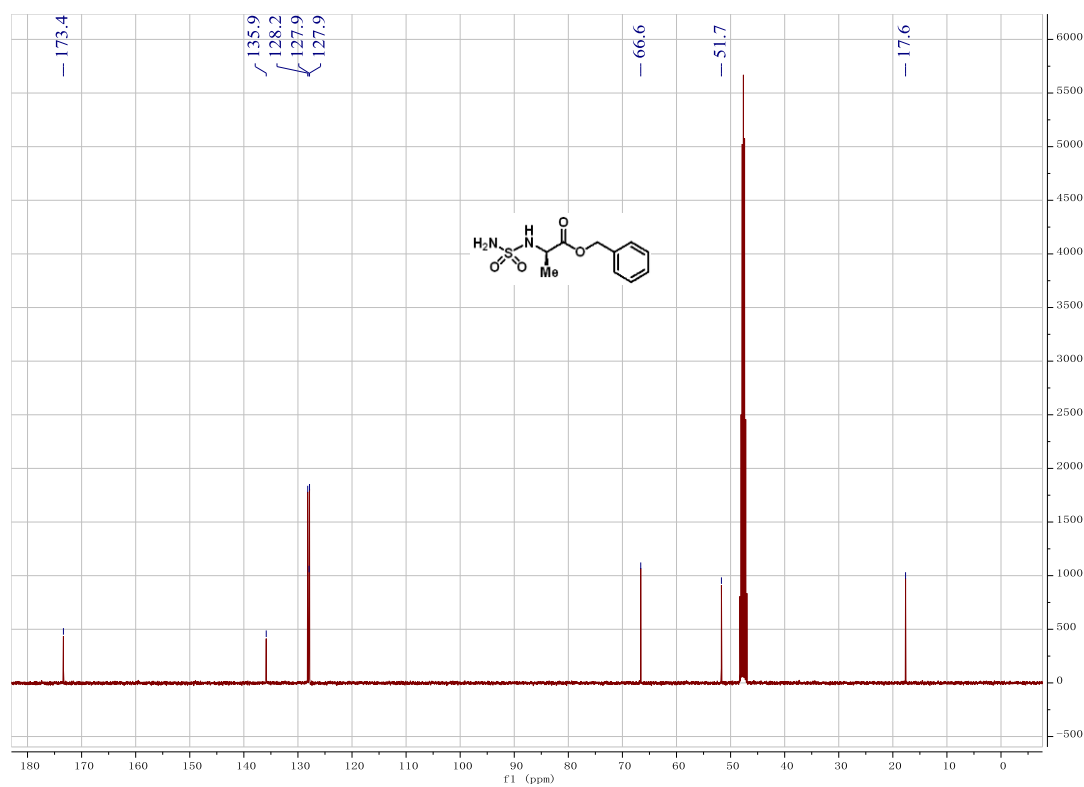

**$^1\text{H}$  (400 MHz, Methanol- $d_4$ ) and  $^{13}\text{C}$  (101 MHz, Methanol- $d_4$ ) spectra of compound 9f**

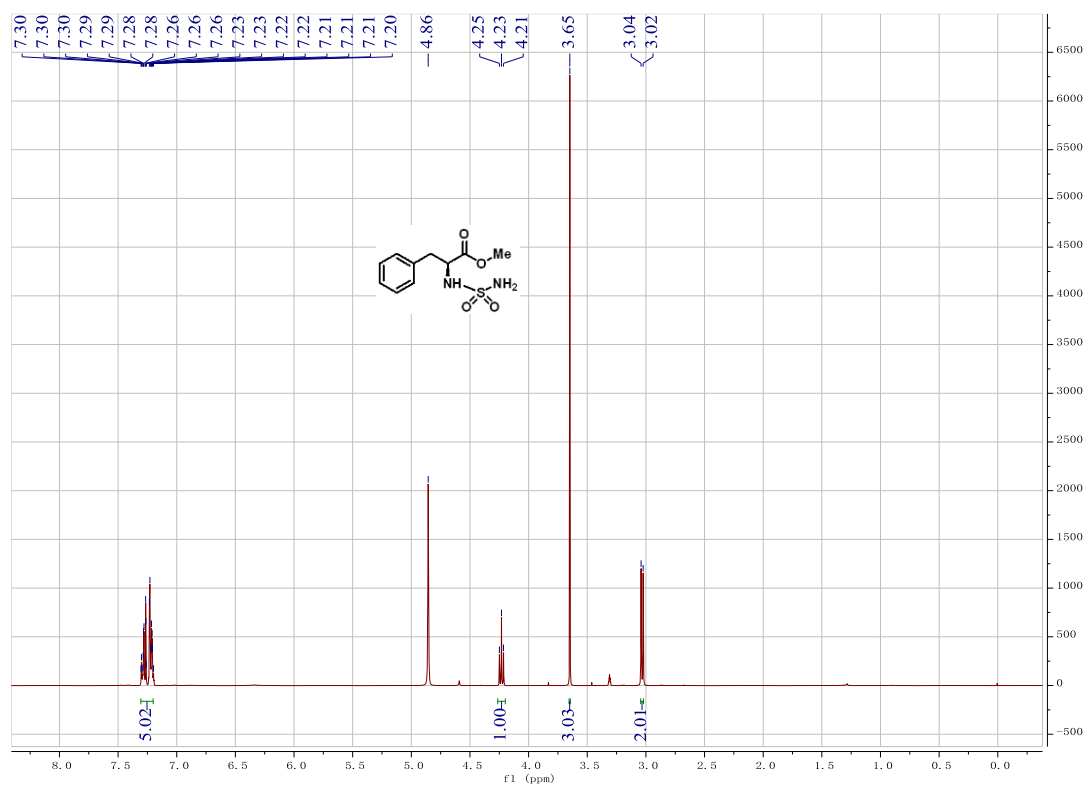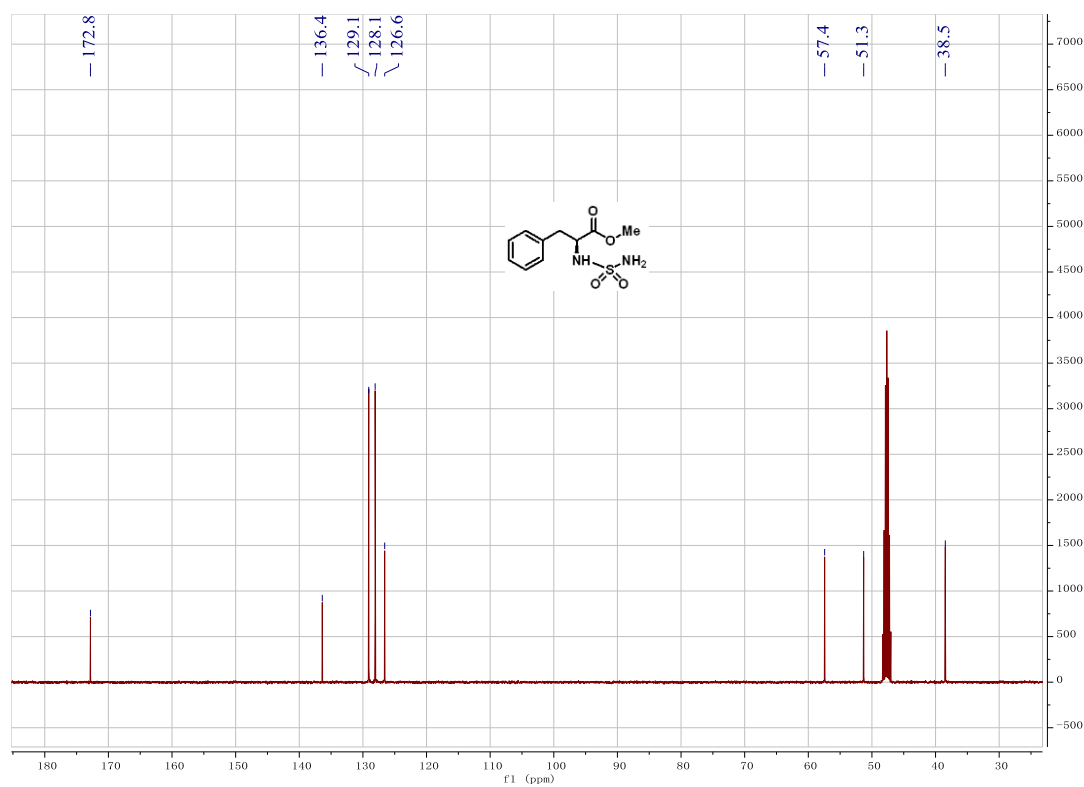

**$^1\text{H}$  (400 MHz, Methanol- $d_4$ ) and  $^{13}\text{C}$  (101 MHz, Methanol- $d_4$ ) spectra of compound 11a**

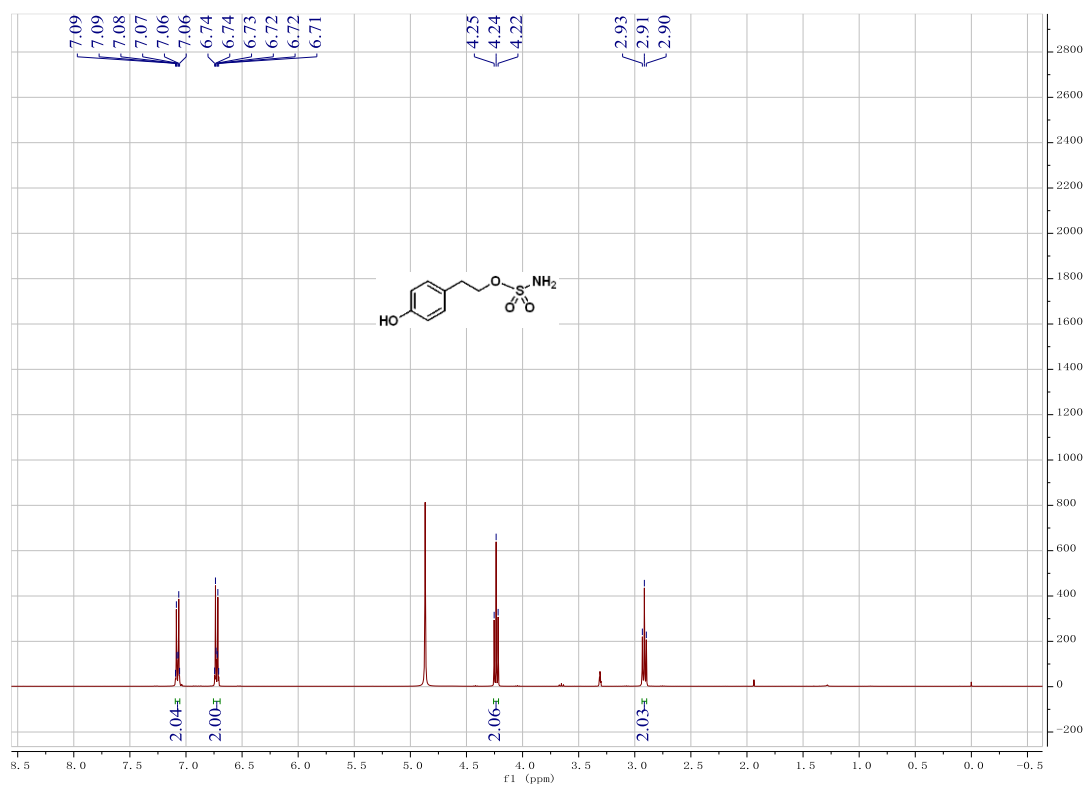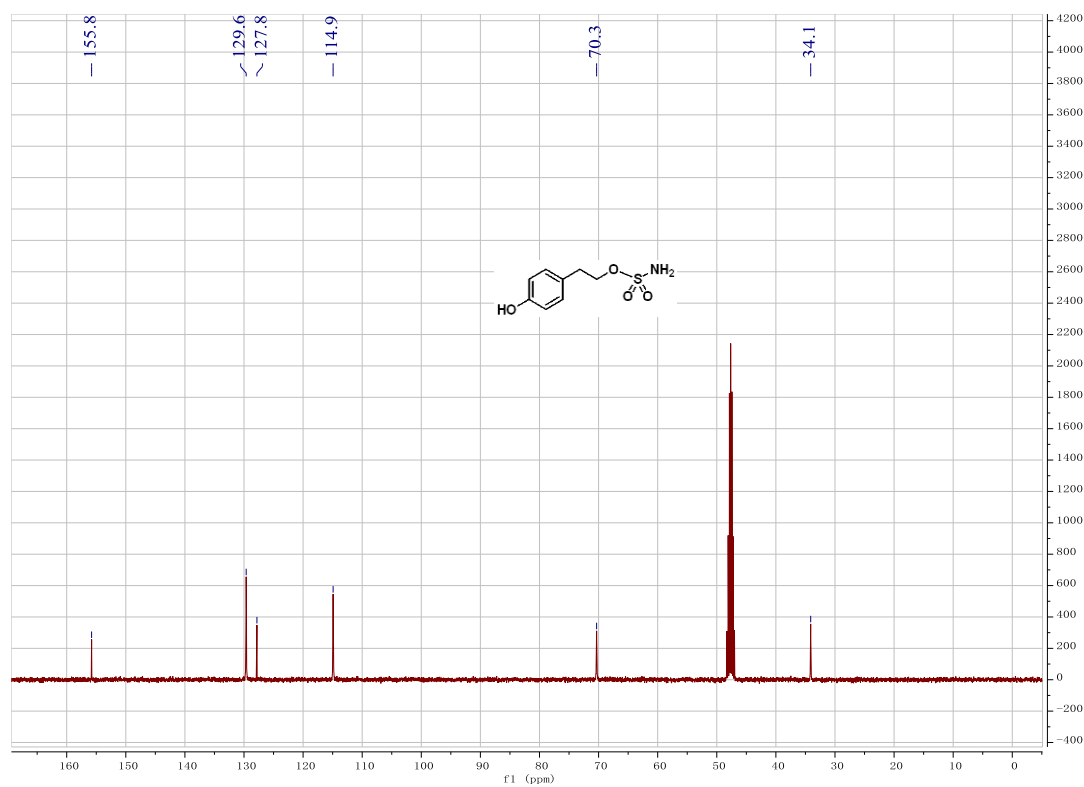

**$^1\text{H}$  (400 MHz, Methanol- $d_4$ ) and  $^{13}\text{C}$  (101 MHz, Methanol- $d_4$ ) spectra of compound 11b**

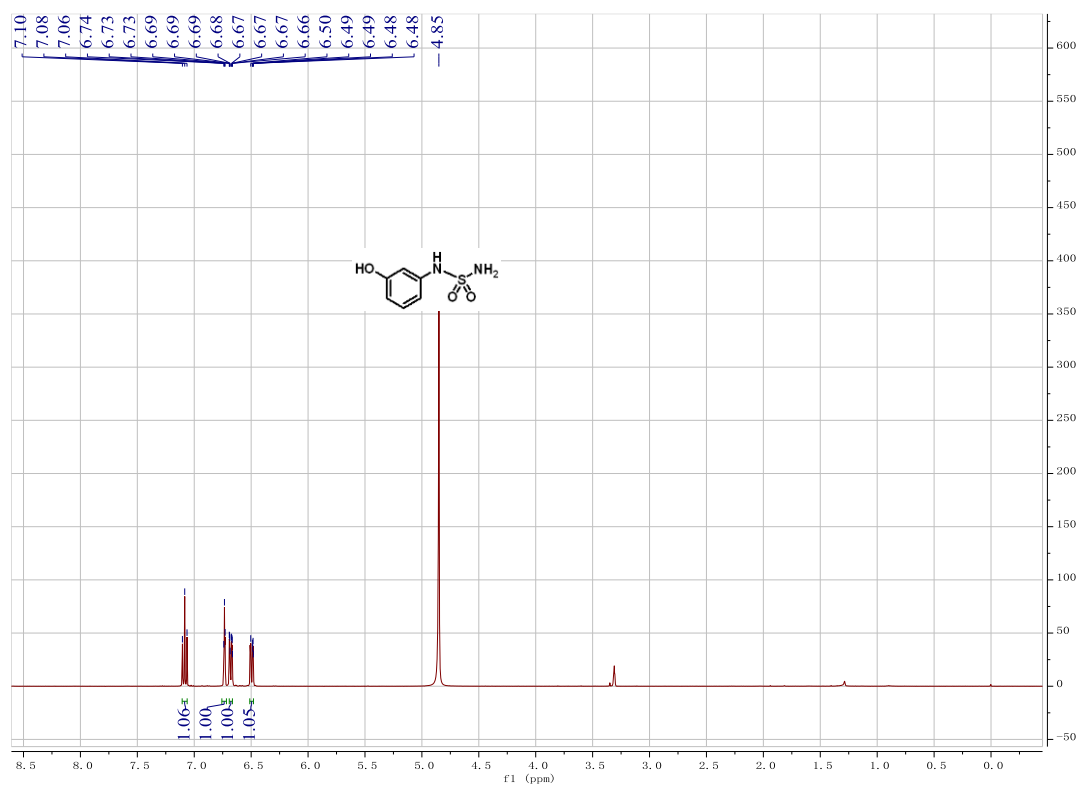

**$^1\text{H}$  (400 MHz, Methanol- $d_4$ ) and  $^{13}\text{C}$  (101 MHz, Methanol- $d_4$ ) spectra of compound 11c**

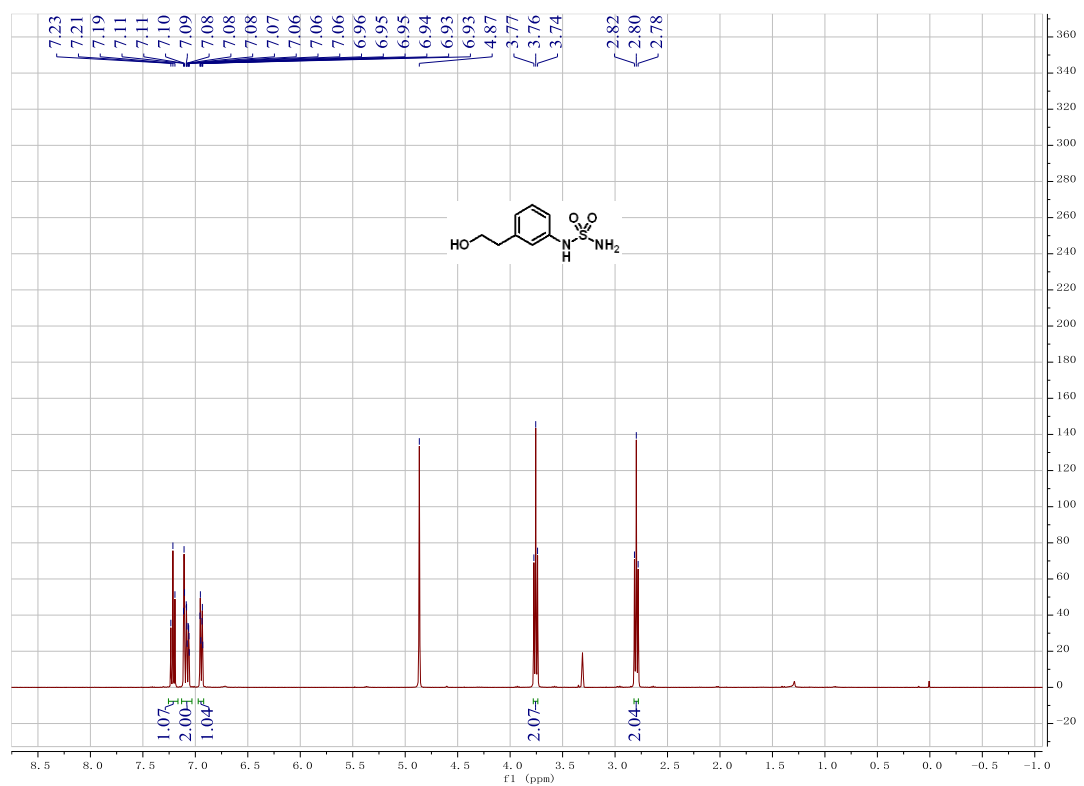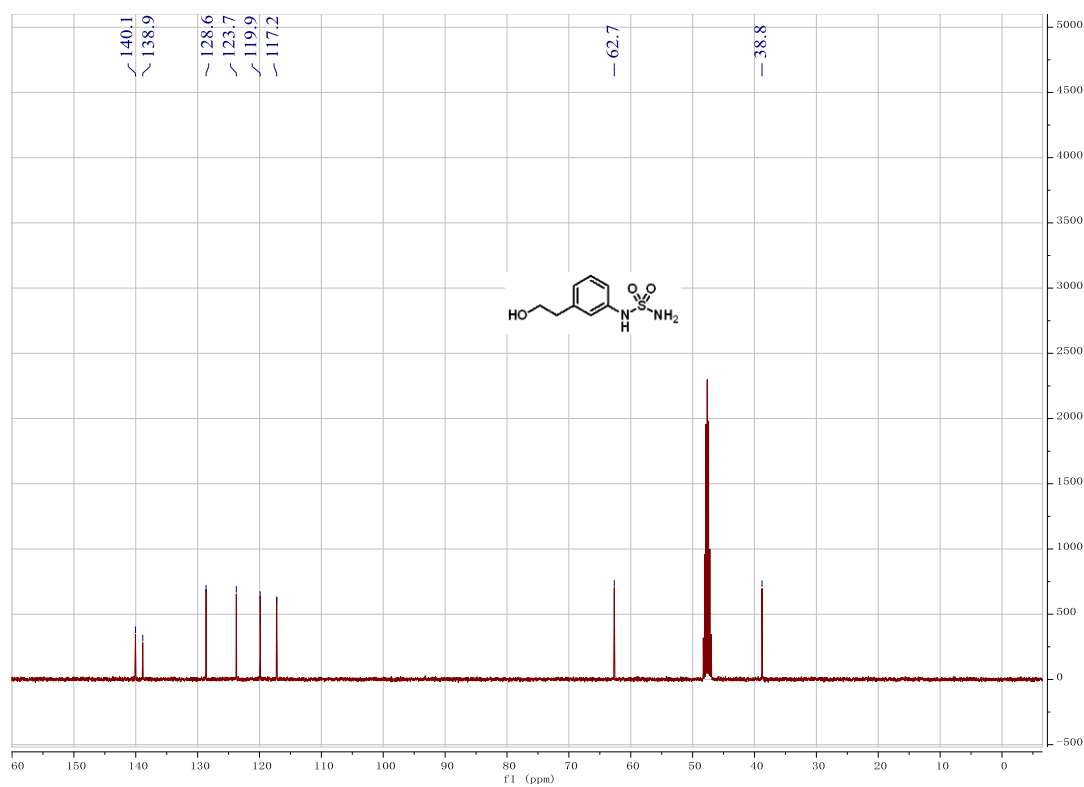



**$^1\text{H}$  (400 MHz, Methanol- $d_4$ ) and  $^{13}\text{C}$  (101 MHz, Methanol- $d_4$ ) spectra of compound 11d**

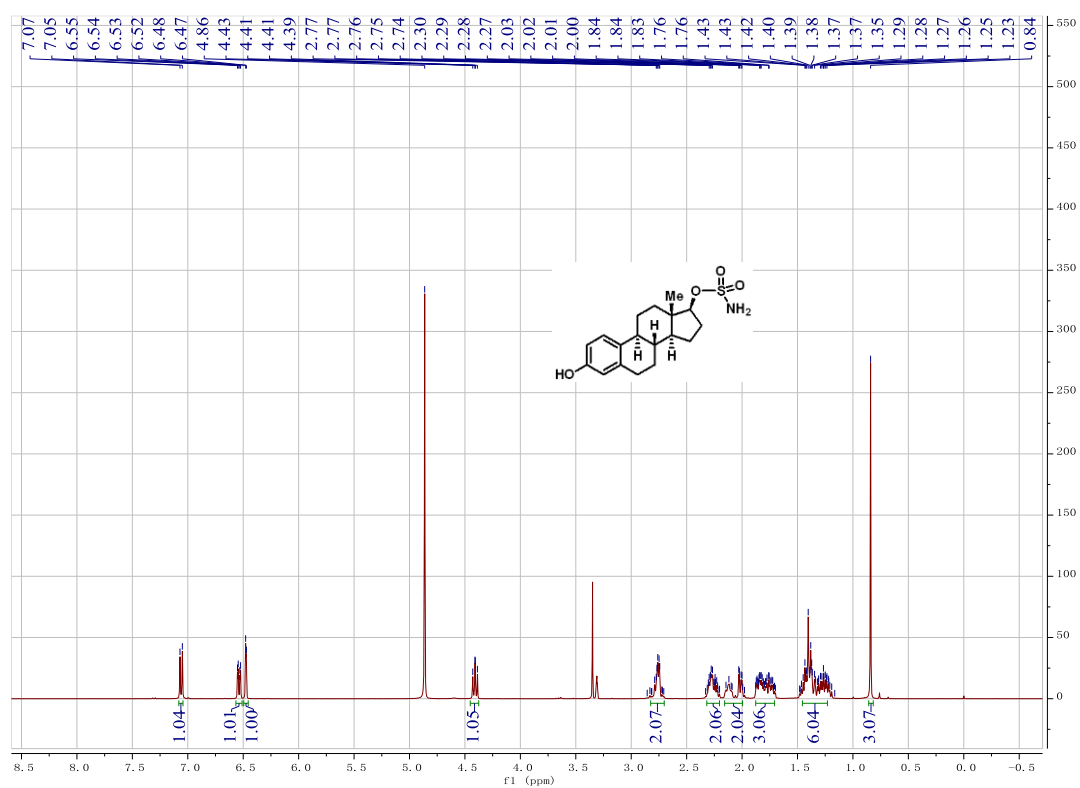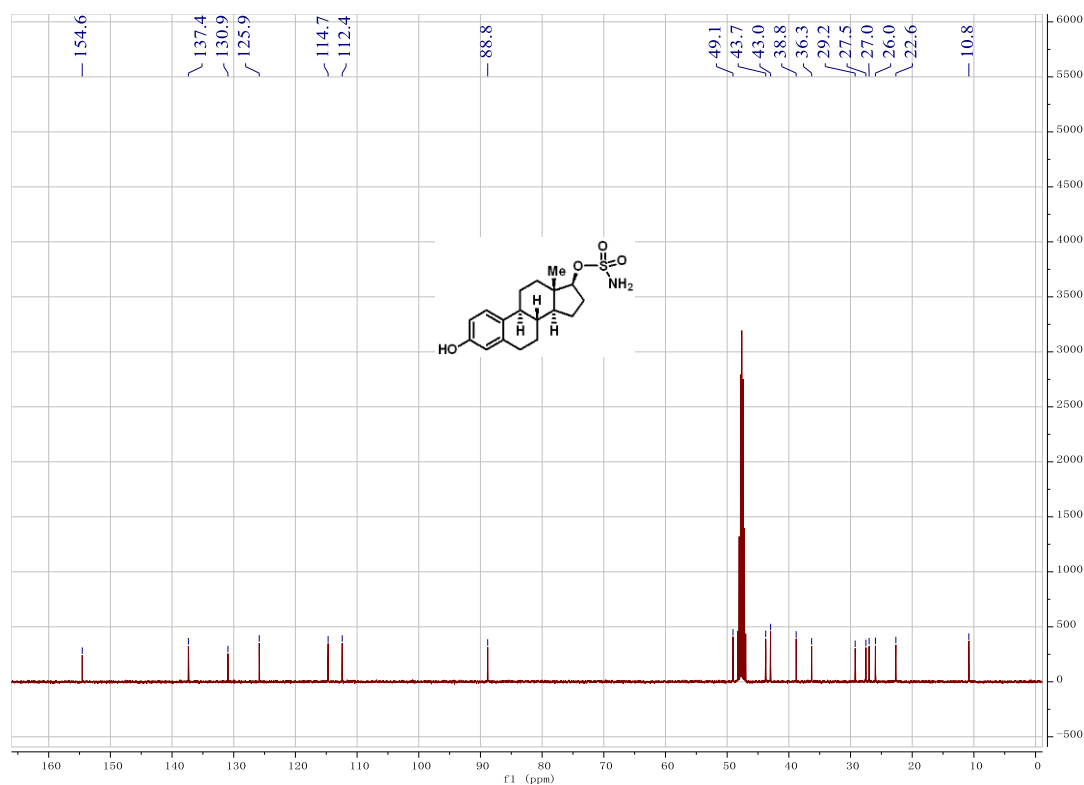

**Chemical structure of compound 10:**

CC1(C)CC2(C)C(C1)C(C(C2)C)C(C(C3C(C4C(C3)C(C4)C)C)C)C(C(C5C(C4)C(C5)C)C)C(C(C6C(C5)C(C6)C)C)C(C(C7C(C6)C(C7)C)C)C(C(C8C(C7)C(C8)C)C)C(C(C9C(C8)C(C9)C)C)C(C(C10C(C9)C(C10)C)C)C(C(C11C(C10)C(C11)C)C)C(C(C12C(C11)C(C12)C)C)C(C(C13C(C12)C(C13)C)C)C(C(C14C(C13)C(C14)C)C)C(C(C15C(C14)C(C15)C)C)C(C(C16C(C15)C(C16)C)C)C(C(C17C(C16)C(C17)C)C)C(C(C18C(C17)C(C18)C)C)C(C(C19C(C18)C(C19)C)C)C(C(C20C(C19)C(C20)C)C)C(C(C21C(C20)C(C21)C)C)C(C(C22C(C21)C(C22)C)C)C(C(C23C(C22)C(C23)C)C)C(C(C24C(C23)C(C24)C)C)C(C(C25C(C24)C(C25)C)C)C(C(C26C(C25)C(C26)C)C)C(C(C27C(C26)C(C27)C)C)C(C(C28C(C27)C(C28)C)C)C(C(C29C(C28)C(C29)C)C)C(C(C30C(C29)C(C30)C)C)C(C(C31C(C30)C(C31)C)C)C(C(C32C(C31)C(C32)C)C)C(C(C33C(C32)C(C33)C)C)C(C(C34C(C33)C(C34)C)C)C(C(C35C(C34)C(C35)C)C)C(C(C36C(C35)C(C36)C)C)C(C(C37C(C36)C(C37)C)C)C(C(C38C(C37)C(C38)C)C)C(C(C39C(C38)C(C39)C)C)C(C(C40C(C39)C(C40)C)C)C(C(C41C(C40)C(C41)C)C)C(C(C42C(C41)C(C42)C)C)C(C(C43C(C42)C(C43)C)C)C(C(C44C(C43)C(C44)C)C)C(C(C45C(C44)C(C45)C)C)C(C(C46C(C45)C(C46)C)C)C(C(C47C(C46)C(C47)C)C)C(C(C48C(C47)C(C48)C)C)C(C(C49C(C48)C(C49)C)C)C(C(C50C(C49)C(C50)C)C)C(C(C51C(C50)C(C51)C)C)C(C(C52C(C51)C(C52)C)C)C(C(C53C(C52)C(C53)C)C)C(C(C54C(C53)C(C54)C)C)C(C(C55C(C54)C(C55)C)C)C(C(C56C(C55)C(C56)C)C)C(C(C57C(C56)C(C57)C)C)C(C(C58C(C57)C(C58)C)C)C(C(C59C(C58)C(C59)C)C)C(C(C60C(C59)C(C60)C)C)C(C(C61C(C60)C(C61)C)C)C(C(C62C(C61)C(C62)C)C)C(C(C63C(C62)C(C63)C)C)C(C(C64C(C63)C(C64)C)C)C(C(C65C(C64)C(C65)C)C)C(C(C66C(C65)C(C66)C)C)C(C(C67C(C66)C(C67)C)C)C(C(C68C(C67)C(C68)C)C)C(C(C69C(C68)C(C69)C)C)C(C(C70C(C69)C(C70)C)C)C(C(C71C(C70)C(C71)C)C)C(C(C72C(C71)C(C72)C)C)C(C(C73C(C72)C(C73)C)C)C(C(C74C(C73)C(C74)C)C)C(C(C75C(C74)C(C75)C)C)C(C(C76C(C75)C(C76)C)C)C(C(C77C(C76)C(C77)C)C)C(C(C78C(C77)C(C78)C)C)C(C(C79C(C78)C(C79)C)C)C(C(C80C(C79)C(C80)C)C)C(C(C81C(C80)C(C81)C)C)C(C(C82C(C81)C(C82)C)C)C(C(C83C(C82)C(C83)C)C)C(C(C84C(C83)C(C84)C)C)C(C(C85C(C84)C(C85)C)C)C(C(C86C(C85)C(C86)C)C)C(C(C87C(C86)C(C87)C)C)C(C(C88C(C87)C(C88)C)C)C(C(C89C(C88)C(C89)C)C)C(C(C90C(C89)C(C90)C)C)C(C(C91C(C90)C(C91)C)C)C(C(C92C(C91)C(C92)C)C)C(C(C93C(C92)C(C93)C)C)C(C(C94C(C93)C(C94)C)C)C(C(C95C(C94)C(C95)C)C)C(C(C96C(C95)C(C96)C)C)C(C(C97C(C96)C(C97)C)C)C(C(C98C(C97)C(C98)C)C)C(C(C99C(C98)C(C99)C)C)C(C(C100C(C99)C(C100)C)C)C(C(C101C(C100)C(C101)C)C)C(C(C102C(C101)C(C102)C)C)C(C(C103C(C102)C(C103)C)C)C(C(C104C(C103)C(C104)C)C)C(C(C105C(C104)C(C105)C)C)C(C(C106C(C105)C(C106)C)C)C(C(C107C(C106)C(C107)C)C)C(C(C108C(C107)C(C108)C)C)C(C(C109C(C108)C(C109)C)C)C(C(C110C(C109)C(C110)C)C)C(C(C111C(C110)C(C111)C)C)C(C(C112C(C111)C(C112)C)C)C(C(C113C(C112)C(C113)C)C)C(C(C114C(C113)C(C114)C)C)C(C(C115C(C114)C(C115)C)C)C(C(C116C(C115)C(C116)C)C)C(C(C117C(C116)C(C117)C)C)C(C(C118C(C117)C(C118)C)C)C(C(C119C(C118)C(C119)C)C)C(C(C120C(C119)C(C120)C)C)C(C(C121C(C120)C(C121)C)C)C(C(C122C(C121)C(C122)C)C)C(C(C123C(C122)C(C123)C)C)C(C(C124C(C123)C(C124)C)C)C(C(C125C(C124)C(C125)C)C)C(C(C126C(C125)C(C126)C)C)C(C(C127C(C126)C(C127)C)C)C(C(C128C(C127)C(C128)C)C)C(C(C129C(C128)C(C129)C)C)C(C(C130C(C129)C(C130)C)C)C(C(C131C(C130)C(C131)C)C)C(C(C132C(C131)C(C132)C)C)C(C(C133C(C132)C(C133)C)C)C(C(C134C(C133)C(C134)C)C)C(C(C135C(C134)C(C135)C)C)C(C(C136C(C135)C(C136)C)C)C(C(C137C(C136)C(C137)C)C)C(C(C138C(C137)C(C138)C)C)C(C(C139C(C138)C(C139)C)C)C(C(C140C(C139)C(C140)C)C)C(C(C141C(C140)C(C141)C)C)C(C(C142C(C141)C(C142)C)C)C(C(C143C(C142)C(C143)C)C)C(C(C144C(C143)C(C144)C)C)C(C(C145C(C144)C(C145)C)C)C(C(C146C(C145)C(C146)C)C)C(C(C147C(C146)C(C147)C)C)C(C(C148C(C147)C(C148)C)C)C(C(C149C(C148)C(C149)C)C)C(C(C150C(C149)C(C150)C)C)C(C(C151C(C150)C(C151)C)C)C(C(C152C(C151)C(C152)C)C)C(C(C153C(C152)C(C153)C)C)C(C(C154C(C153)C(C154)C)C)C(C(C155C(C154)C(C155)C)C)C(C(C156C(C155)C(C156)C)C)C(C(C157C(C156)C(C157)C)C)C(C(C158C(C157)C(C158)C)C)C(C(C159C(C158)C(C159)C)C)C(C(C160C(C159)C(C160)C)C)C(C(C161C(C160)C(C161)C)C)C(C(C162C(C161)C(C162)C)C)C(C(C163C(C162)C(C163)C)C)C(C(C164C(C163)C(C164)C)C)C(C(C165C(C164)C(C165)C)C)C(C(C166C(C165)C(C166)C)C)C(C(C167C(C166)C(C167)C)C)C(C(C168C(C167)C(C168)C)C)C(C(C169C(C168)C(C169)C)C)C(C(C170C(C169)C(C170)C)C)C(C(C171C(C170)C(C171)C)C)C(C(C172C(C171)C(C172)C)C)C(C(C173C(C172)C(C173)C)C)C(C(C174C(C173)C(C174)C)C)C(C(C175C(C174)C(C175)C)C)C(C(C176C(C175)C(C176)C)C)C(C(C177C(C176)C(C177)C)C)C(C(C178C(C177)C(C178)C)C)C(C(C179C(C178)C(C179)C)C)C(C(C180C(C179)C(C180)C)C)C(C(C181C(C180)C(C181)C)C)C(C(C182C(C181)C(C182)C)C)C(C(C183C(C182)C(C183)C)C)C(C(C184C(C183)C(C184)C)C)C(C(C185C(C184)C(C185)C)C)C(C(C186C(C185)C(C186)C)C)C(C(C187C(C186)C(C187)C)C)C(C(C188C(C187)C(C188)C)C)C(C(C189C(C188)C(C189)C)C)C(C(C190C(C189)C(C190)C)C)C(C(C191C(C190)C(C191)C)C)C(C(C192C(C191)C(C192)C)C)C(C(C193C(C192)C(C193)C)C)C(C(C194C(C193)C(C194)C)C)C(C(C195C(C194)C(C195)C)C)C(C(C196C(C195)C(C196)C)C)C(C(C197C(C196)C(C197)C)C)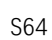

**$^1\text{H}$  (400 MHz, Methanol- $d_4$ ) and  $^{13}\text{C}$  (101 MHz, Methanol- $d_4$ ) spectra of compound 11f**

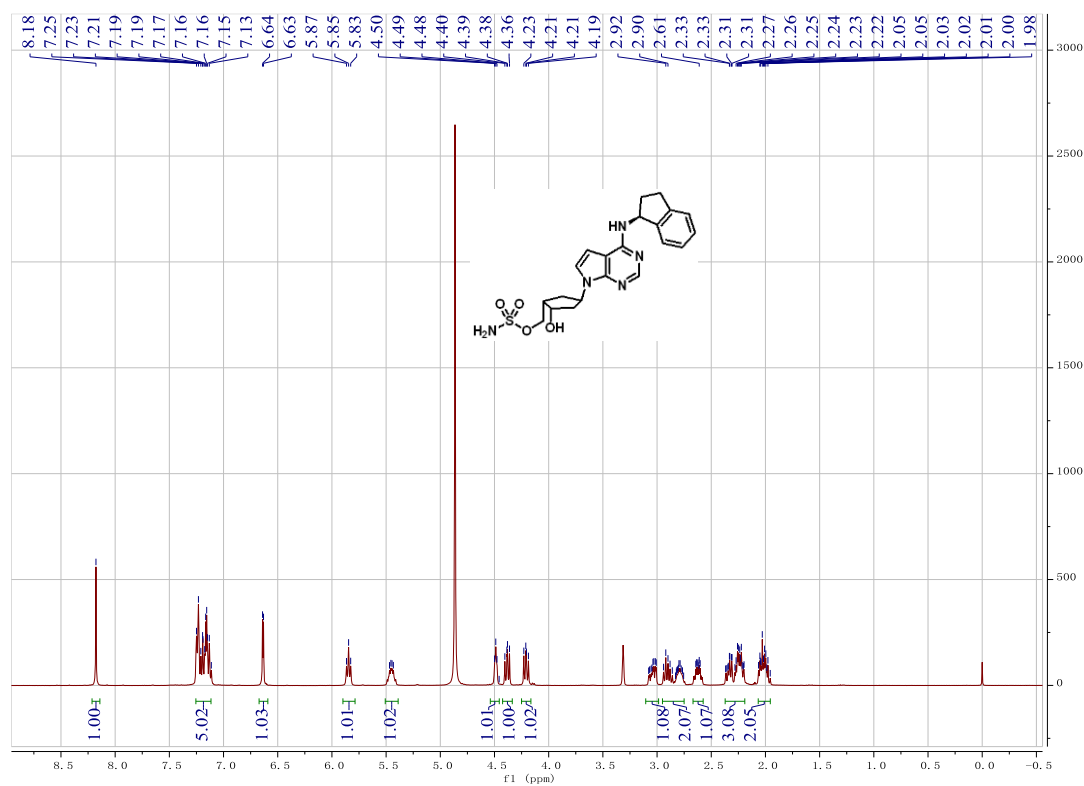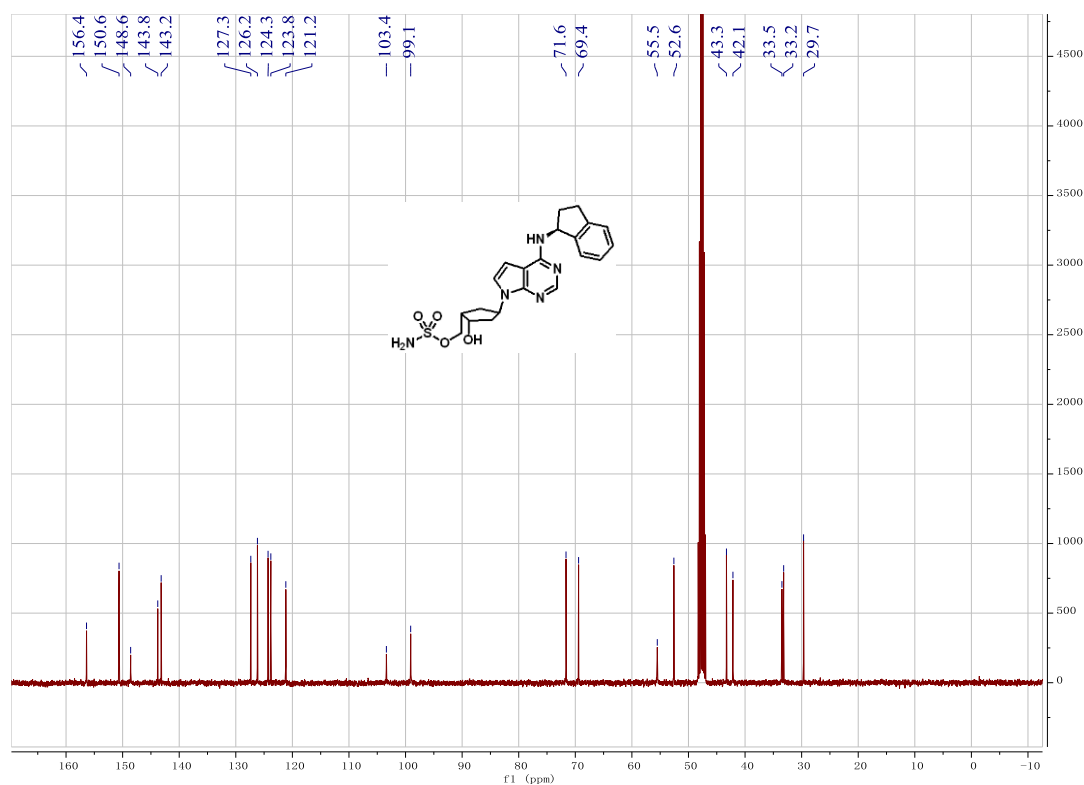

---

## References

- (1) Soucy, T. A.; Smith, P. G.; Milhollen, M. A.; Berger, A. J.; Gavin, J. M.; Adhikari, S.; Brownell, J. E.; Burke, K. E.; Cardin, D. P.; Critchley, S.; Cullis, C. A.; Doucette, A.; Garnsey, J. J.; Gaulin, J. L.; Gershman, R. E.; Lublinsky, A. R.; McDonald, A.; Mizutani, H.; Narayanan, U.; Olhava, E. J.; Peluso, S.; Rezaei, M.; Sintchak, M. D.; Talreja, T.; Thomas, M. P.; Traore, T.; Vyskocil, S.; Weatherhead, G. S.; Yu, J.; Zhang, J.; Dick, L. R.; Claiborne, C. F.; Rolfe, M.; Bolen, J. B.; Langston, S. P. An inhibitor of NEDD8-activating enzyme as a new approach to treat cancer. *Nature*. **2009**, *458*, 732-736.
